# Supplementary material for: What are the physical and psychological health effects of suicide bereavement on family members? An observational and interview mixed-methods study in Ireland
Source: PubMed Central journal article supplement — BMJ Open. 2018 Jan 13;8(1):e019472. doi: 10.1136/bmjopen-2017-019472 (PMC5781012; doi:10.1136/bmjopen-2017-019472), 2018-01-13
Supplement: bmjopen-2017-019472.draft_revisions.pdf [file bmjopen-2017-019472.draft_revisions.pdf]

# BMJ Open

BMJ Open is committed to open peer review. As part of this commitment we make the peer review history of every article we publish publicly available.

When an article is published we post the peer reviewers' comments and the authors' responses online. We also post the versions of the paper that were used during peer review. These are the versions that the peer review comments apply to.

The versions of the paper that follow are the versions that were submitted during the peer review process. They are not the versions of record or the final published versions. They should not be cited or distributed as the published version of this manuscript.

BMJ Open is an open access journal and the full, final, typeset and author-corrected version of record of the manuscript is available on our site with no access controls, subscription charges or pay-per-view fees (<http://bmjopen.bmj.com>).

If you have any questions on BMJ Open's open peer review process please email [editorial.bmjopen@bmj.com](mailto:editorial.bmjopen@bmj.com)

# BMJ Open

## What are the physical and psychological health effects of suicide bereavement on family members? An observational and interview mixed-methods study

|                               |                                                                                                                                                                                                                                                                                                                                                                                                                                                                                                                                                                                                                                                                                                                                                                                  |
|-------------------------------|----------------------------------------------------------------------------------------------------------------------------------------------------------------------------------------------------------------------------------------------------------------------------------------------------------------------------------------------------------------------------------------------------------------------------------------------------------------------------------------------------------------------------------------------------------------------------------------------------------------------------------------------------------------------------------------------------------------------------------------------------------------------------------|
| Journal:                      | <i>BMJ Open</i>                                                                                                                                                                                                                                                                                                                                                                                                                                                                                                                                                                                                                                                                                                                                                                  |
| Manuscript ID                 | bmjopen-2017-019472                                                                                                                                                                                                                                                                                                                                                                                                                                                                                                                                                                                                                                                                                                                                                              |
| Article Type:                 | Research                                                                                                                                                                                                                                                                                                                                                                                                                                                                                                                                                                                                                                                                                                                                                                         |
| Date Submitted by the Author: | 04-Sep-2017                                                                                                                                                                                                                                                                                                                                                                                                                                                                                                                                                                                                                                                                                                                                                                      |
| Complete List of Authors:     | <p>Spillane, Ailbhe; University College Cork National University of Ireland, Department of Epidemiology and Public Health; National Suicide Research Foundation</p> <p>Matvienko-Sikar, Karen; University College Cork National University of Ireland, Department of Epidemiology and Public Health</p> <p>Larkin, Celine; University of Massachusetts Medical School Department of Medicine, Department of Emergency Medicine</p> <p>Corcoran, Paul; University College Cork, Department of Epidemiology and Public Health; Cork University Maternity Hospital, Department of Obstetrics and Gynaecology</p> <p>Arensman, Ella ; University College Cork National University of Ireland, Department of Epidemiology and Public Health; National Suicide Research Foundation</p> |
| Keywords:                     | Mixed-methods, Suicide bereavement, Family members, Morbidity, Health                                                                                                                                                                                                                                                                                                                                                                                                                                                                                                                                                                                                                                                                                                            |
|                               |                                                                                                                                                                                                                                                                                                                                                                                                                                                                                                                                                                                                                                                                                                                                                                                  |

SCHOLARONE™  
Manuscripts

Only

1  
2  
3 **What are the physical and psychological health effects of suicide bereavement on family**  
4 **members? An observational and interview mixed-methods study**  
5  
6  
7

8  
9 Ailbhe Spillane<sup>1,2\*</sup>, Karen Matvienko-Sikar<sup>1</sup>, Celine Larkin<sup>3</sup>, Paul Corcoran<sup>2,4</sup>, Ella Arensman<sup>1,2</sup>  
10  
11

12  
13  
14 \*Corresponding author: Ms Ailbhe Spillane ([ailbhe.spillane@ucc.ie](mailto:ailbhe.spillane@ucc.ie); 00353 21 4205544)  
15

- 16  
17  
18 1. Department of Epidemiology and Public Health, 4<sup>th</sup> Floor Western Gateway Building,  
19 Western Road, Cork, Ireland  
20  
21  
22 2. National Suicide Research Foundation, Room 4.28, Western Gateway Building,  
23 Western Road, Cork, Ireland  
24  
25  
26  
27 3. Department of Emergency Medicine, University of Massachusetts Medical School,  
28 Worcester, MA, USA  
29  
30  
31 4. Department of Obstetrics and Gynaecology, Cork University Maternity Hospital, 5th  
32 Floor, Wilton, Cork, Ireland  
33  
34  
35

36 **Keywords:** mixed-methods, suicide bereavement, family members, morbidity, health  
37  
38

39  
40 **Word count:** 6,122  
41  
42  
43  
44  
45  
46  
47  
48  
49  
50  
51  
52  
53  
54  
55  
56  
57  
58  
59  
60

## ABSTRACT

**Objectives:** Research focussing on the impact of suicide bereavement on family members' physical and psychological health is scarce. The aim of this study was to examine how family members have been physically and psychologically affected following suicide bereavement. A secondary objective of the study was to describe the needs of family members bereaved by suicide.

**Design:** A mixed-methods study was conducted, using qualitative semi-structured interviews and additional quantitative self-report measures of depression, anxiety and stress (DASS-21).

**Setting:** Consecutive suicide cases and next-of-kin were identified by examining coroner's records in Cork City and County, Ireland from October 2014 to May 2016.

**Participants:** Eighteen family members bereaved by suicide took part in a qualitative interview. They were recruited from the Suicide Support and Information System: A Case-Control Study (SSIS-ACE) where family members bereaved by suicide (n = 33) completed structured measures of their wellbeing.

**Results:** Qualitative findings indicated four superordinate themes in relation to experiences following suicide bereavement: (1) immediate grief reactions and its consequences; (2) enduring physical, psychological and psychosomatic difficulties; (3) range of support needs required and its influencers; and (4) reconstructing life after deceased's suicide. Initial feelings of guilt, blame, shame and anger often manifested in enduring physical, psychological and psychosomatic difficulties. Support needs were diverse and were often related to the availability or absence of informal support by family or friends. Quantitative results indicated that the proportion of respondents above the DASS-21 cut-offs respectively were 24% for depression, 18% for anxiety and 27% for stress.

**Conclusions:** Healthcare professionals' awareness of the adverse physical and psychosomatic health difficulties experienced by family members bereaved by suicide is essential. Pro-actively facilitating support for this group could help to reduce the negative health sequelae. The effects of suicide bereavement are wide-ranging, including high levels of stress, depression, anxiety, and physical health difficulties.

### Strengths and limitations of the study

- This study addressed a specific knowledge gap by examining the physical and psychological health effects of suicide bereavement on family members in Ireland
- The study covered consecutive cases of suicide, which increases the external validity of the outcomes
- This study screened open verdict deaths with validated screening criteria to identify probable suicides. Therefore, this study benefits from the inclusion of probable suicide cases that would otherwise have not been included in the study
- Physical health issues were self-reported and were not objectively measured

### INTRODUCTION

Suicide is a significant global concern, with approximately 800,000 people taking their own lives every year[1]. Consequently, for every suicide, up to 60 people are intimately affected[2]. Recent research also indicates that 1 in 20 people have experienced a suicide in the past year, and 1 in 5 during their lifetime[3]. Quantitative research has highlighted adverse mental health outcomes of suicide bereavement, including heightened risk of suicide[4-6], attempted suicide[6-9], depression[10 11], psychiatric morbidity[7] and psychiatric admission[11]. However, qualitative research examining physical and psychosomatic health morbidity in the aftermath of suicide bereavement is sparse.

To date, several quantitative studies have been conducted to investigate whether suicide bereavement confers a higher risk of physical morbidity compared to other causes of death [4 6 12-15]. People bereaved by suicide had poorer general health[16 17], reported more pain[17], reported more physical illnesses[18] and disorders including cardiovascular disease, chronic obstructive pulmonary disease, hypertension and diabetes[11]. In addition, suicide-bereaved family members visited a GP more often[18] and had significantly higher rates of outpatient physician visits for physical illnesses[11] than non-suicide bereaved individuals. These negative health outcomes illustrate the importance of timely and effective health services and psychosocial supports for those bereaved by suicide, many of whom may carry existing health adversities prior to the death[11].

1  
2  
3 Previous research has emphasised the importance of access to support for people  
4 bereaved by suicide [19 20]. Feelings of depression, anxiety, guilt, extreme sadness, anger  
5 and nightmares motivate help-seeking in people bereaved by suicide[21 22]. Some research  
6 has been conducted into explore the perceived needs of family members bereaved by  
7 suicide. Both formal support, in the form of health service use, and informal support help  
8 from friends, families or other non-medical sources, were found to be important. It is critical  
9 to consider that each type of support addresses different needs[23-25]. A quarter of those  
10 bereaved by sudden natural death that they were most affected by the death in the first  
11 week[20]. One third of those bereaved by unnatural causes of death reported that they  
12 were most affected in the first six months following the death[20]. One study noted that  
13 first-degree relatives had greater need for formal support than second-degree and non-  
14 relatives[26]. Compared to those bereaved by sudden natural causes of death, people  
15 bereaved by suicide were less likely to receive informal support and immediate support  
16 following the death, and were more likely to experience a delay in receiving support [20].  
17  
18  
19  
20  
21  
22  
23  
24  
25  
26

27 Although a significant number of quantitative studies have examined the association  
28 between suicide bereavement and subsequent physical health outcomes, the topic has  
29 rarely been examined from an experiential perspective using qualitative research involving a  
30 non-selective sample[27 28]. Researchers are beginning to identify the need for further  
31 qualitative research in this area[29], to take into account the inherent complexity of grieving  
32 and social processes[12]. A recent qualitative systematic review identified three areas that  
33 are important for those bereaved by suicide; feelings experienced by those bereaved by  
34 suicide, the meaning-making process following bereavement, and the social context[30].  
35 Specifically, the authors note that those bereaved by suicide experienced a range of grief  
36 reactions, including shame, stigma, blame, guilt, emptiness and a lack of social supports  
37 following the bereavement[30]. In addition, other common feelings included anger and  
38 depression[28]. However, this review only included studies on the thematic processes of  
39 suicide bereavement and did not report on health outcomes following suicide bereavement.  
40  
41  
42  
43  
44  
45  
46  
47  
48  
49

50 While the mental and physical health effects of suicide bereavement have been  
51 examined in quantitative studies, they lack the detailed unique insight into the physical  
52 health experiences of people bereaved by suicide. The primary aim of this research is to  
53 examine how people have been physically and psychologically affected by a family  
54  
55  
56  
57

1  
2  
3 member's suicide. A secondary objective of the study is to describe the support needs  
4 required by family members bereaved by suicide. The current mixed-methods approach  
5 benefits from leveraging the advantages of both quantitative and qualitative methodological  
6 approaches[31], while being able to provide a more comprehensive and in-depth  
7 consideration of the research problem under investigation[32].  
8  
9

## 11 **METHODS**

### 13 **Study design and setting**

14  
15  
16 This study applied a mixed-methods approach. The qualitative study was linked to a larger  
17 case-control study, the Suicide Support and Information System: A Case-Control Study (SSIS-  
18 ACE, January 2014-March 2017). Qualitative interviews were supplemented with  
19 quantitative data of suicide-bereaved family members' wellbeing, which was collected as  
20 part of the larger case-control study. Further information on the study design has been  
21 reported elsewhere[33] and is available as a supplementary file.  
22  
23  
24  
25  
26

### 27 **Sample and recruitment**

#### 28 *Qualitative study*

29  
30  
31 A subset of the 33 participants over the age of eighteen who took part in the SSIS-ACE study  
32 and who consented for further follow-up were approached to take part in the qualitative  
33 study. At the time of the qualitative study recruitment, there were 29 participants in the  
34 larger study to sample from. Three of these did not provide written consent for further  
35 follow-up and one only wanted to be contacted again by the researcher that conducted the  
36 initial psychological autopsy interview. Therefore, 25 individuals were initially contacted via  
37 a letter. Nineteen participants agreed to the interview but one participant did not consent  
38 for the interview to be audio-recorded and was therefore excluded from the qualitative  
39 analysis. This yielded a response rate of 75%. In one instance, two family members were  
40 interviewed together at their request. No repeat interviews were conducted. Full details of  
41 the recruitment process are illustrated in figure 1. Mean time since bereavement during the  
42 qualitative interviews was 27.6 months (range: 15- 38 months). Half of all family members  
43 interviewed (n = 9) found the deceased's body, while the other half (n = 9) were informed of  
44 the death by other family members or a member of the police force.  
45  
46  
47  
48  
49  
50  
51  
52  
53  
54  
55  
56  
57  
58  
59  
60

### *Quantitative study*

The quantitative data outlined in this paper was collected as part of a larger case-control study (SSIS-ACE). In SSIS-ACE, a senior researcher reviewed records of consecutive suicides and open verdict files from inquests held by all coroners in Cork, Ireland over a 19-month period. Open verdict files that met the Rosenberg criteria[34] for the determination of suicide[34] were eligible for inclusion in the study as probable suicides[33]. Relatives were eligible to participate in an interview for the case-control study if they were well-acquainted enough with the deceased to provide detailed information with respect to the deceased's life and were over the age of 14 years. Family members were contacted by letter and then by telephone and invited to participate in the psychological autopsy interview. 'Psychological autopsy' is a specific research method which involves retrospectively collecting information on aspects of a suicide decedents life, including socio-demographics, previous self-harm, mental health, physical health, personality traits and treatment provided by health care professionals before the suicide[35]. This information is primarily gathered via structured interviews with family or friends of the deceased and also information obtained by health professionals who treated the deceased[35]. The study took into account elements of the psychological autopsy approach according to Conner and colleagues[36]. Thirty-four family members agreed to take part but one interview was not fully completed and was excluded from analyses. Therefore, full interviews were completed with 33 family members (44%). This response rate is similar to other psychological autopsy studies[37 38]. The mean time since bereavement during the psychological autopsy interviews was 10.2 months (range: 6 – 21 months).



1  
2  
3  
4  
5  
6  
7  
8  
9  
10  
11  
12  
13  
14  
15  
16  
17  
18  
19  
20  
21  
22  
23  
24  
25  
26  
27  
28  
29  
30  
31  
32  
33  
34  
35  
36  
37  
38  
39  
40  
41  
42  
43  
44  
45  
46  
47  
48  
49  
50  
51  
52  
53  
54  
55  
56  
57  
58  
59  
60

For peer review only

**Insert Figure 1 here**

1  
2  
3 **Figure 1:** Flowchart of recruitment process for SSIS-ACE study  
4

5 **Measures**  
6

7 *Qualitative study*  
8

9  
10 Semi-structured interviews (n = 18) were conducted with the aid of a topic guide[33]  
11 in order to explore the experiences of people bereaved by the suicide. Participants'  
12 permission to audio-record the interview was obtained. Thirteen interviews took place in  
13 the participant's home, two in university research offices and three at a neutral location  
14 selected by participants. All interviews took place in a single session. Mean length of  
15 interviews was 97.5 minutes (range 42-180 minutes).  
16  
17  
18  
19

20  
21 *Quantitative study*  
22

23 Family members' wellbeing was assessed using the 21-item version of the Depression,  
24 Anxiety, and Stress Scale (DASS-21) [39]. This scale assesses a participant's wellbeing in the  
25 past week. The scale successfully differentiates between the three affective states while also  
26 demonstrating consistency between clinical and non-clinical samples[39]. Median scores of  
27 depression, anxiety and stress, together with dichotomised variables were presented.  
28 Recommended cut-off scores to generate severity level ranges from normal, mild,  
29 moderate, severe and extremely severe categories[40]. However, due to small numbers in  
30 the study, it was not possible to subdivide the sample by these five categories. Therefore,  
31 participants who met the criteria for depression, anxiety and/or stress at the levels between  
32 mild and extremely severe were collapsed into a category of above the "normal" cut-off and  
33 those below these scores were classified as "normal". Scores of  $\geq 10$  for depression,  $\geq 8$  for  
34 anxiety and  $\geq 15$  for stress were considered indicative of the presence of depression, anxiety,  
35 or stress respectively. These cut-off points have been used previously [39 41] and are  
36 considered diagnostic indicators of potential diagnoses of depression, anxiety and/or stress  
37 [40 42]. All statistical analyses were conducted using SPSS Version 22.  
38  
39  
40  
41  
42  
43  
44  
45  
46  
47  
48  
49  
50  
51  
52  
53  
54  
55  
56  
57  
58  
59  
60

## Data analysis

### *Qualitative study*

Qualitative data were analysed using thematic analysis, which is a flexible method that allows for a variety of ontological and epistemological stances[43]. Thematic analysis involves a number of steps, including familiarising oneself with the data, generating initial codes, searching, reviewing and finally, defining themes[43]. Two authors (AS and KMS) coded the data and all stages of coding and development of themes were discussed with the research team. NVIVO 11 software facilitated the organisation of the data. In the absence of standardised guidelines to report mixed-methods research, the Consolidated Criteria for Reporting Qualitative Research (COREQ) checklist was used and is available as a supplementary file.

### *Quantitative study*

Descriptive statistics were used to present information on the age, gender and marital status of the suicide decedents, the method of suicide, if a suicide note was present and if there was a history of self-harm prior to the death. The age and gender of the family members and their relationship to the deceased were also presented using descriptive statistics. The characteristics of those interviewed for the follow-up qualitative study was compared with those who were not interviewed using Chi-Square and T-tests. Tests of normality indicated the data was non-normal and therefore non-parametric tests were utilised. Median scores and inter-quartile ranges were computed to describe the DASS-21 sub-scales and total score. A Mann-Whitney U test was used to test for differences in wellbeing for males and females and for people bereaved by a hanging or non-hanging suicide.

## RESULTS

### *Qualitative results*

The 18 participants interviewed for the qualitative study did not significantly differ from those not interviewed regarding their gender ( $p = .42$ ), age ( $p = .56$ ), relationship to the deceased ( $p = .69$ ), method of suicide ( $p = .69$ ), their depression ( $p = .49$ ), anxiety ( $p = .08$ ),

1  
2  
3 stress ( $p = .59$ ) and total score ( $p = .28$ ) on the DASS-21 scale. Four main themes were  
4 identified from the analysis process: 'immediate grief reactions and its consequences',  
5 'enduring physical, psychological and psychosomatic health difficulties', 'range of support  
6 needs required and its influencers', and 'reconstructing life after deceased's death'.  
7  
8  
9

### 10 11 12 *Immediate grief reactions*

13  
14  
15 Participants described a range of immediate physical and psychological reactions when they  
16 found out that their family member took their own life. Initial psychological reactions  
17 included disbelief, shock, devastation, blame, guilt and extreme sadness. Participants often  
18 felt angry, both towards the deceased and also healthcare professionals who cared for the  
19 deceased. Conversely, two participants were not angry with their loved one for taking their  
20 own lives: one participant felt relieved their family member was no longer suffering  
21 psychologically and "felt she had escaped, she got out of it" and revealed it "alleviated some  
22 of the pressure" as "she was going to get worse and worse". Feelings of numbness were  
23 reported, with some participants not wanting to believe that their loved one was dead. One  
24 family member could not believe her sister was dead until she was given the chance to view  
25 her body. The delay in receiving the news about the death and viewing the body appears to  
26 have been especially difficult for her when acknowledging the death:  
27  
28  
29  
30  
31  
32  
33  
34

35  
36 "I went on then for the night like nothing had happened being honest with you, it was just  
37 numb and I didn't want to believe it until I saw it for myself. That was the Wednesday and  
38  
39 we didn't see her until the Friday"  
40  
41

42 Immediate psychosomatic reactions included nausea, vomiting, breathlessness, numbness,  
43 memory loss, and an inability to stand as "my legs had just given way". One participant  
44 noted an immediate physical change to their health, as their heart rate escalated upon  
45 hearing about the death, which resulted in a diagnosis of hypertension the following day:  
46  
47  
48

49 "My heart rate went up straight away, through the roof. Actually, I had to see a doctor on  
50 the next day [sic]...and I'm on blood pressure control pills since then and I will be probably  
51  
52 for the rest of my life".  
53  
54  
55  
56  
57  
58  
59  
60

1  
2  
3 Other psychosomatic health reactions often noted by participants included physical pain,  
4 severe abdominal pains, loss of appetite, low energy levels and inability to sleep in the  
5 immediate aftermath of the suicide. Some participants attributed their low energy levels to  
6 “the emotion” and “turmoil” associated with their grieving, while others felt it was due to  
7 their disrupted sleeping patterns. Reported problems with sleeping in the immediate  
8 aftermath varied in severity and duration. One participant described how they “couldn’t  
9 sleep at all in the beginning” and another described how they attempted to tire themselves  
10 during the day with walks in an attempt to sleep at night. A number of participants  
11 described experiencing distressing nightmares and visions of the deceased:  
12  
13  
14  
15  
16  
17

18  
19 “The son came in like and he was asking me what I was doing...[deceased] was talking to me,  
20 I was talking to him, he was there like, do you know what I’m saying...I thought he  
21 was, I was out of my bed and the whole lot”.

22  
23  
24  
25 Loss of appetite was reported by some participants as a psychosomatic reaction which often  
26 led to weight loss. Reasons for loss of appetite varied, including nausea due to flashbacks of  
27 finding the body, feelings of depression and despondence following the death:  
28  
29

30  
31 “Food-wise, I’m never hungry, I could stay without it all day...if I have a cup of tea and a bit  
32 of bread in the morning, I’m grand...Since himself has gone, you’re just getting up in the  
33 morning doing the odd old thing, sure what’s the point in doing it like”.

34  
35  
36 “the daughter brought up burgers and chips last night, I suppose I took about 8 chips out of  
37 it, that’s it now I said, I’ve had enough of it, mother you’re not eating at all she said, no said  
38 I, I’ve had enough. It’s very hard to explain but you’re not in the mood for eating”.

39  
40  
41  
42 Finding the decedent’s body appeared to induce more severe reactions in some cases which  
43 often extended to longer-term psychological impacts, including depression, anxiety, panic  
44 attacks, post-traumatic stress disorder, suicidal thoughts and suicide attempts.  
45  
46

47  
48 “I was depressed afterwards and I...still have this fuzziness in my head...it’s very hard to  
49 explain. It feels like I’m stressed, stressed, like even small little things I can’t deal with”

50  
51  
52 One participant noted that they were not distressed at finding the body but described the  
53 scene as “calm”, while also providing her with the opportunity to say goodbye to the  
54 deceased. It also allowed her to lay “down on the ground beside him and I put my head  
55  
56  
57

1  
2  
3 down on his chest...he was still warm and everything...I just stayed there for a long...I  
4 suppose it was my way of saying goodbye to him”.

5  
6  
7  
8  
9 *Enduring physical, psychological and psychosomatic difficulties*

10  
11 The initial experiences of the majority of family members bereaved by suicide set the stage  
12 for enduring physical, psychological and psychosomatic difficulties in the months following  
13 the bereavement. Firstly, a number of adverse mental health outcomes were reported by  
14 family members including being more concerned about their own mental health,  
15 experiencing suicidal thoughts, suicide attempts, depression, anxiety, post-traumatic stress  
16 disorder (PTSD), nightmares, memory loss and intrusive images of the deceased. One  
17 participant attempted suicide in the months after the suicide but emphasised they did not  
18 want to die but rather to escape the emotional pain and depression:  
19  
20  
21  
22  
23  
24

25  
26 “The morning that it happened, I just woke up and the feeling was so awful just inside my  
27 head, I thought like I just can’t stick this anymore, so that’s why I done it. It was just like to  
28 get away from this awful feeling”  
29  
30

31  
32 Ongoing intrusive images of the deceased and how they died were also reported by a  
33 number of participants. These images were not restricted to those who found the body but  
34 were also experienced by those who were informed of the death by others. One participant  
35 was preoccupied with the violent and traumatic nature of the death which resulted in her  
36 still being unable to sleep at night:  
37  
38  
39  
40

41 “I’d be awake all night...and then I’m wrecked during the day. In the dead of night in the  
42 dark I think about how she done it...that would make me ill”  
43  
44

45 Additionally, a number of participants reported psychosomatic symptoms including, chronic  
46 feelings of low energy/exhaustion, persistent chest pains, breathlessness and physical pain  
47 which endured in the months after deceased’s death. Their health status was often  
48 influenced by their health behaviours. Some family members noted “everything stopped,  
49 the world stopped that day” and tried but failed to resume their normal physical activity.  
50 For others, negative health behaviours, including excessive alcohol consumption and over-  
51 eating were used as a coping mechanism:  
52  
53  
54  
55  
56  
57

1  
2  
3 “I’d drink I’d say [pauses] a bottle of vodka a day and a few pints as well... it’s [the alcohol  
4 consumption] got a bit worse... I don’t know if it’s directly related to it or whether I’m using  
5 it as an excuse”  
6  
7

8  
9 Importantly, some family members experienced an improvement in health behaviours,  
10 including, increasing their levels of physical activity which benefited fitness levels, healthy  
11 weight loss and aided the grieving process:  
12  
13

14 “I went out to the dancing on a Wednesday night, I said make new friends you know...Ya I’ve  
15 got fitter... That was a big boost for me to chat to people and pass away the week”  
16  
17

18 Participants experienced a number of adverse physical health problems in the months after  
19 the deceased’s suicide, including being diagnosed with hypertension, type 1 diabetes and  
20 diverticulitis. Participants attributed these diagnoses to the stress of the deaths:  
21  
22

23  
24 “I was hospitalised again this week with it...the doctor came in and said “you need to stop,  
25 you really need to stop, it’s not cancer but it’s going to affect you for the rest of your life...I  
26 know that’s a consequence of dealing with [deceased’s death]”  
27  
28

### 29 30 *Range of support needs required and its influencers* 31

32 Participant’s needs for support were complex, with both formal and informal support being  
33 required to address intense psychological, psychosomatic and physical symptoms brought  
34 about by feelings of anger, guilt and blame:  
35  
36

37  
38 “I went to a bereavement information evening one night before I started any counselling,  
39 they put up on a screen physical symptoms and there was about 20 different things and I  
40 could tick at least 10 of them, shortness of breath, panic attacks, headaches, chest pains,  
41 physical chest pains...crippling abdominal pains...it’s the anger that manifests itself in  
42 physical pain”  
43  
44  
45  
46

47 Informal support, in the form of practical and emotional support from family and friends  
48 was as important as formal support to some participants. One participant described how  
49 “every night for so long my parents came over to stay every night”, while another credited  
50 his wife as “the biggest support that I have received”. He went on to say that if he was “just  
51 left to wallow in it”, that he “would have gone into a big black hole over it”. Another  
52  
53  
54  
55  
56  
57

1  
2  
3 participant emphasized the importance of both informal and formal support following a  
4 suicide:

5  
6  
7 “The love of my family...“come home, we’ll mind you” and they did, that was incredible and  
8 if some poor person doesn’t have that, I really pity them. It’s your family and your friends  
9 that gets you through that, and the counselling”  
10  
11

12 Others described how family and friends helped with funeral arrangements, financial  
13 support, preparing or bringing food to the family member and helping with practical jobs  
14 around the house, such as maintaining the house and garden in the weeks and months after  
15 the death:  
16  
17  
18

19  
20 “My friends from down the town would come up every day with food and I would always  
21 forgot they were going to do it [laughs] so they were coming up for about a month with  
22 food, they were so kind... I was embarrassed but I found it helpful”  
23  
24  
25

26 In some instances, fractured family relations impeded the family member receiving informal  
27 support. In those instances, the importance of formal support is paramount:  
28  
29

30 “I have a sister but then we fell out over this, I don’t have any contact with them...My  
31 problem is if I was feeling down, I wouldn’t say it to them... [I’d be] very wary of people  
32 because I’ve said things and it’s gone around town...I know I can trust my counsellor or my  
33 doctor or yourself there now”  
34  
35  
36

37 Another participant sought formal support as they “needed to speak to somebody outside  
38 of my family because I was upsetting everybody when I wanted to talk”. Seeking formal  
39 support was imperative “to get the counselling, just taking time to reflect on everything and  
40 deal with it”. Two participants noted respectively that there was “no pressure with money”  
41 from the counsellor and if they didn’t have “the money that day she’d say give it to me  
42 when you have it”. A number of participants spoke about having to stop formal support due  
43 to financial reasons, with one participant stating that there “should be free counselling for  
44 people bereaved by suicide”:  
45  
46  
47  
48  
49  
50

51  
52 “I hadn’t any steady money coming in, my illness benefit had finished and stuff like that...So  
53 that’s the reason I finished up with him [counsellor]”  
54  
55  
56  
57



1  
2  
3 The understanding and flexibility of some bereavement counsellors following the suicide  
4 were hugely valued by participants. However, not all experiences with formal support were  
5 positive, with one person noting that the counsellors were “too shocked to deal with me”,  
6 while another said the counsellor “had the clock ticking”. Participants noted that nobody  
7 proactively contacted them to offer formal support. This point is particularly salient as many  
8 spoke of being unable to seek help themselves or were unsure of what help was required.  
9 Feeling “so awful” and “you don’t even know what you need” were significant barriers to  
10 seeking help while others had to “make the phone calls” and “run after all of them [the  
11 counselling services]”. One participant spoke about how she didn’t approach her own GP for  
12 help “but he never came with a list of things either to see how I was either, here’s a list of  
13 services you can avail of”. She expected him to contact her and she explained “it’s very hard  
14 yourself because you don’t even know what you need”. As a result, she was searching the  
15 internet “to find anything” and spoke about how “things aren’t readily available I think in  
16 this day and age even though mental health is a really important thing”.

17  
18  
19  
20  
21  
22  
23  
24  
25  
26  
27 Some participants wanted to attend a suicide bereavement support group as they felt  
28 counsellors could not “possibly understand what’s going on in my head, like unless they’ve  
29 been through it”. Others spoke of wanting to talk to others “with similar experiences”  
30 because “I think it’s important for me to feel that I’m not the only one going through this”.  
31 Additionally, one participant felt that she would benefit from it “because I do find I’m alone  
32 in my thoughts of it and I’m interested in getting other peoples stories so I can relate [to it]”.  
33 However, no such support groups were available for any of the participants. A small number  
34 of participants reported that they did not require any formal support. One participant spoke  
35 with their husband about whether they needed counselling and both concluded that they  
36 can “hack this” on their own. Specifically, two participants who noted they did not require  
37 formal support were engaging in over-eating and excessive alcohol consumption as coping  
38 mechanisms.

#### 49 *Reconstructing life after deceased’s suicide*

50  
51 Each participant was confronted with trying to comprehend, make sense of and reconstruct  
52 aspects of their lives following their family member’s suicide. Part of this reconstruction was  
53 reappraising what was important to them and how they thought about life. Some  
54  
55  
56  
57

1  
2  
3 participants chose to make big life changes after the death, including moving homes,  
4 changing jobs or completely disengaging from the work environment:  
5

6  
7 “I haven’t gone back to my old job in [big city], you know life has changed and I was working  
8 long days and didn’t really have a life, now, I’m looking back and saying, there’s a little bit  
9 more to life than that you know?”  
10  
11

12 Two participants moved house soon after the death. One described that she “couldn’t stay  
13 there” as the death occurred in the house. The other participant was forced to sell the  
14 house to pay off the debts the deceased had accumulated but had hidden from his partner.  
15 The participant felt a sense of rejection and betrayal that the deceased didn’t trust her  
16 enough to speak to her about their spiralling debts. She would have “toughed it out and said  
17 to him ok what are we going to do about it” but she feels he was afraid to tell her as “I  
18 suppose he thought I’d leave him”. Three participants were in the process of selling their  
19 properties or had a strong desire to move at the time of the interview as one felt she could  
20 not “move forward while I’m in this house presently” due to her experience of visions of the  
21 deceased in the house.  
22  
23  
24  
25  
26  
27  
28  
29

### 30 **Quantitative results**

#### 31 *Characteristics of decedents and family members*

32  
33 Characteristics of the 33 suicide decedents and family members bereaved by suicide are  
34 presented in Table 1. The majority of suicide decedents were male (72.7%), aged 40-59  
35 years (42.4%), were single (42.4%) at the time of death, and died by hanging (57.6%). While,  
36 just over half of the suicide-bereaved family members were female (54.5%) and aged  
37 between 40-59 years (57.6%). The most commonly represented kinship was partner/spouse  
38 (36.4%). 39.4% of suicide decedents were educated to secondary school level, followed by  
39 one quarter (27.3%) and one fifth (21.2%) were educated to post-leaving certificate and  
40 third level, respectively. The majority of suicide decedents (42.4%) were employed/self-  
41 employed prior to their death. Data for the other educational and employment categories  
42 were not presented to maintain confidentiality. Hanging was the most common method of  
43 suicide (57.6%), with over half of the sample having a history of intentional self-harm prior  
44 to their suicide (54.5%). Just under a half of suicide decedents (45.5%) left a suicide note.  
45  
46  
47  
48  
49  
50  
51  
52  
53  
54  
55  
56  
57  
58  
59  
60

Table 1: Characteristic of suicide decedents and suicide-bereaved family members (n = 33)

|                                               | Suicide decedents N (%) | Family members N (%) |
|-----------------------------------------------|-------------------------|----------------------|
| <b>Sex</b>                                    |                         |                      |
| Male                                          | 24 (72.7)               | 15 (45.5)            |
| Female                                        | 9 (27.3)                | 18 (54.5)            |
| <b>Age</b>                                    |                         |                      |
| 18-39 years                                   | 9 (27.3)                | 7 (21.2)             |
| 40-59 years                                   | 14 (42.2)               | 19 (57.6)            |
| 60+ years                                     | 10 (30.3)               | 7 (21.2)             |
| <b>Interviewee's relationship to deceased</b> |                         |                      |
| Partner/Spouse                                |                         | 12 (36.4)            |
| Parent                                        |                         | 7 (21.2)             |
| Sibling                                       |                         | 9 (27.3)             |
| Child                                         |                         | 5 (15.2)             |
| <b>Marital status</b>                         |                         |                      |
| Single                                        | 14 (42.2)               |                      |
| Married/co-habiting                           | 12 (36.4)               |                      |
| Widowed/divorced/separated                    | 7 (21.2)                |                      |

*Wellbeing outcomes (DASS-21 scale)*

Median scores on the DASS-21 were highest for stress (Mdn = 12.00, IQR = 11.00), followed by depression (Mdn = 4.00, IQR = 8.00) and anxiety (Mdn = 2.00, IQR = 5.00). Nearly one-quarter of the sample (24.2%) had scores that indicated the presence of at least mild levels of depression. One in four suicide-bereaved family members (27.3%) that indicated the presence of at least mild levels of stress. Just under a fifth of participants (18.2%) had scores

that indicated the presence of at least mild levels of anxiety (Table 2). These outcomes refer to participants' wellbeing in the week before the interview.

Table 2: Descriptive statistics of DASS-21 scale scores

|                         | Median (IQR)  | Range | Above "normal" cut-off N (%) <sup>1</sup> |
|-------------------------|---------------|-------|-------------------------------------------|
| <b>Depression score</b> | 4.00 (8.00)   | 0-34  | 8 (24.2)                                  |
| <b>Anxiety score</b>    | 2.00 (5.00)   | 0-24  | 6 (18.2)                                  |
| <b>Stress score</b>     | 12.00 (11.00) | 0-28  | 9 (27.3)                                  |
| <b>Total score</b>      | 18.00 (26.00) | 0-76  |                                           |

A Mann-Whitney U test revealed no significant difference in the levels of depression ( $p = .47$ ), anxiety ( $p = .37$ ) and stress ( $p = .81$ ) between suicide-bereaved males and females (Table 3). A Mann-Whitney U test also revealed no significant differences for levels of depression ( $p = .43$ ), anxiety ( $p = .45$ ) and stress ( $p = .61$ ) between those bereaved by hanging and non-hanging suicides (Table 3).

Table 3: DASS-21 median rank scores by gender and method of suicide

|                  | Males         | Females       | p   | Hanging       | Non-hanging <sup>2</sup> | p   |
|------------------|---------------|---------------|-----|---------------|--------------------------|-----|
|                  | N = 15        | N = 18        |     | N = 19        | N = 14                   |     |
| Variable         | Median (IQR)  |               |     |               |                          |     |
| Depression score | 4.00 (10.00)  | 4.00 (7.00)   | .47 | 4.00 (6.00)   | 4.00 (13.00)             | .43 |
| Anxiety score    | 2.00 (2.00)   | 3.00 (14.00)  | .37 | 2.00 (6.00)   | 2.00 (6.00)              | .45 |
| Stress score     | 12.00 (12.00) | 11.00 (11.00) | .81 | 10.00 (10.00) | 13.00 (13.00)            | .61 |
| Total score      | 18.00 (26.00) | 18.00 (32.00) | .93 | 18.00 (14.00) | 19.00 (29.00)            | .74 |

## DISCUSSION

### Principal findings

<sup>1</sup> Scores of  $\geq 10$  for depression,  $\geq 8$  for anxiety and  $\geq 15$  for stress

<sup>2</sup> Includes every other method besides hanging

1  
2  
3 The qualitative and quantitative aspects of this study provides insight into the  
4 unique grief processes and health impacts experienced by family members bereaved by  
5 suicide. The qualitative study further addresses a significant gap in the literature by  
6 exploring the physical, psychosomatic health experiences and health behaviours of suicide-  
7 bereaved family members. Results from the quantitative component of this study indicate  
8 that a sizeable minority of suicide-bereaved family members experienced elevated levels of  
9 depression, anxiety, and stress. Other empirical studies have found similar rates of  
10 depression and anxiety amongst suicide-bereaved people to the current study, with one  
11 study finding that 18% of the sample were moderately to severely depressed, as measured  
12 on the PHQ-9, while 21% reported anxiety symptoms on the GAD- 2[44]. Furthermore, the  
13 prevalence of depression in family members bereaved by suicide was reported in previous  
14 studies as 30.5%[11] and 23%[45]. Other studies of nonclinical samples of adults had lower  
15 median scores on the DASS-21 scale when compared to the suicide-bereaved median scores  
16 found in this study[46 47]. Therefore, this indicates that those bereaved by suicide may have  
17 higher rates of depression, anxiety and stress compared to nonclinical adult samples.  
18  
19

20  
21  
22 One possible explanation for the lower than expected prevalence of depression,  
23 anxiety and/or stress in our sample may be selection bias. Those family members who chose  
24 to take part in the study may have had lower levels of psychopathology or difficulties with  
25 the grieving process than other bereaved family members, and therefore may have been  
26 more likely to take part in the study. One recent population-based study compared suicide-  
27 bereaved parents with matched non-bereaved parents: 20.5% of suicide-bereaved parents  
28 refused to take part or to complete the study on the grounds of distress or ill-health,  
29 compared to just 7.6% of non-suicide bereaved parents[44]. This suggests that those who  
30 agree to take part in suicide bereavement research may be in better health than those who  
31 declined to participate. Consequently, the number of suicide-bereaved people experiencing  
32 high levels of depression, anxiety, and/or stress in this study and other empirical research  
33 may be an underestimate of the true figure.  
34  
35

36  
37  
38 Findings from the qualitative interviews indicate that the initial feelings experienced  
39 by family members bereaved by suicide include disbelief, shock, blame, guilt and anger.  
40 These mirror findings from other qualitative studies [30]. Our qualitative and quantitative  
41 results indicate that suicide-bereaved family members experience a number of adverse  
42  
43  
44  
45  
46  
47  
48  
49

1  
2  
3 psychological problems including, depression, anxiety, panic attacks, suicidal thoughts,  
4 intrusive images, nightmares and PTSD. In addition, a number of participants also  
5 experienced adverse psychosomatic health experiences including feelings of nausea,  
6 vomiting, chest pains, palpitations, physical pain, abdominal pains, and breathlessness. In  
7 some cases, these symptoms continued in the months after the death and were associated  
8 with diagnoses such as hypertension, diverticulitis and type 1 diabetes. Bolton and  
9 colleagues[11] took a quantitative approach and similarly found that suicide-bereaved  
10 parents had significantly higher rates of cardiovascular disease, chronic obstructive  
11 pulmonary disease, hypertension, diabetes, depression and anxiety disorders compared  
12 accident-bereaved parents. Therefore, this study corroborates these previous findings that  
13 people bereaved by suicide can experience adverse physical and psychological health  
14 outcomes.

24 The quantitative and particularly the qualitative component of this study illustrate  
25 the difficulties encountered by family members bereaved by suicide and consequently, the  
26 support they require. Research compiled by Grad and colleagues[48] underlies the  
27 importance of those bereaved by suicide having the opportunity to seek support from  
28 outside the family. Some participants spoke of the desire to attend a suicide support group.  
29 However, there is little research on the effectiveness of these groups for those bereaved by  
30 suicide[49]. It was also clear from the interviews that financial difficulties in the aftermath of  
31 the suicide were unfortunately common and prevented many from accessing formal support  
32 services. Participants spoke about having to halt their counselling sessions due to a lack of  
33 money to pay for the service. Reasons for financial difficulties varied and included inheriting  
34 debts accrued by the deceased prior to the death or having to give up or take a break from  
35 work due to grieving difficulties. Another study found that duration of support was  
36 important, with 27% of people believing they required professional help for at least 12  
37 months following the death. Furthermore, 25% and 17.4% reported needing support for at  
38 least two years, or for as long as required[26]. These points underlie the importance of not  
39 only providing timely and effective support to people bereaved by suicide but also support  
40 that does not preclude people due to their financial circumstances.

### 54 **Strengths and limitations**

1  
2  
3 This is the first mixed-methods study to specifically examine and explore the physical and  
4 psychological health implications of suicide bereavement from both a quantitative and a  
5 qualitative perspective. The quantitative data for this study was derived from the larger  
6 SSIS-ACE case-control study which included consecutive cases of suicide and open verdict  
7 cases that met the Rosenberg criteria for the determination of suicide [34]. The validity of  
8 this research can be considered good as this research covered both confirmed suicide  
9 deaths and open verdicts deaths as these may in fact be hidden suicide cases[50-52].  
10 Furthermore, researchers have recommended that such cases meeting criteria for a  
11 probable suicide should be included in future research studies[51]. While the numbers of  
12 suicide-bereaved family members in the study is modest, the quantitative results are similar  
13 to those obtained in larger studies, as previously stated[11 45]. The interviewer for the  
14 qualitative component of the study (AS) did not conduct any of the interviews for the SSIS-  
15 ACE study, which minimises the risk of interviewer bias in the mixed-methods study. This  
16 study has two main limitations. Firstly, family members' physical health experiences were  
17 self-reported and therefore do not constitute an objective measure. An objective measure  
18 of physical health would remove any potential for recall bias in participants' responses.  
19 However, the focus of the qualitative component of the study is to understand family  
20 member's experience of their own health, rather than objective health status. Secondly, the  
21 relatively small quantitative sample size did not allow for more sophisticated statistical  
22 analyses, including controlling for potential confounding factors such as closeness to the  
23 deceased, kinship and time since death which may have impacted on the results presented.  
24 Further mixed-methods research examining an objective measure of physical health would  
25 be a significant addition to the knowledge base.  
26  
27  
28  
29  
30  
31  
32  
33  
34  
35  
36  
37  
38  
39  
40  
41  
42

### 43 **Implications**

44  
45 Considering previous research in the area, this study adds to the existing knowledge-base in  
46 a number of ways. While the mental health outcomes of suicide bereavement have been  
47 well-researched, there has been a dearth of research specifically examining the physical and  
48 psychosomatic health outcomes of suicide bereavement from an experiential perspective.  
49 Several implications arise from this research for professionals seeking to support people  
50 bereaved by suicide. First, equal attention needs to be given to the physical and emotional  
51 sequelae following suicide bereavement by clinicians. This research suggests that one in  
52  
53  
54  
55  
56  
57

1  
2  
3 four people bereaved by suicide will suffer elevated levels of depression and stress and just  
4 under one in five will have elevated levels of anxiety. Additionally, a recent systematic  
5 review noted that there is tentative evidence to suggest that suicide-bereaved family  
6 members have an increased risk for a number of adverse physical health outcomes  
7 compared to people bereaved by other causes of death[11 16-18 53]. Second, it was clear  
8 that, due to mental and physical health difficulties, some people were not able to effectively  
9 identify or seek support. This underlies the importance of health professionals, coroners and  
10 any other professional to pro-actively facilitate support for those bereaved by suicide. This  
11 professional support is especially important when strained or fractured familial relations  
12 affect the quality of the bereaved person's informal support network.  
13  
14  
15  
16  
17  
18  
19

### 20 **Author affiliations**

21  
22 <sup>1</sup> Department of Epidemiology and Public Health, University College Cork, Cork, Ireland  
23

24  
25 <sup>2</sup> National Suicide Research Foundation, University College Cork, Cork, Ireland  
26

27  
28 <sup>3</sup> Department of Emergency Medicine, University of Massachusetts Medical School,  
29 Worcester, MA, USA  
30

31  
32 <sup>4</sup> Department of Obstetrics and Gynaecology, University College Cork, Cork, Ireland  
33

### 34 **Acknowledgements**

35 The authors would like to thank all of those who took the time to take part in the interviews.  
36 The authors would also like to acknowledge Dr Christina Dillon for her guidance with respect  
37 to the quantitative data analysis.  
38  
39  
40

### 41 **Author's contribution**

42 AS drafted the initial protocol document. AS, CL, EA and PC contributed to the design of the  
43 study. KMS, CL, PC and EA contributed to planned analyses. KMS, CL, EA and PC contributed  
44 to revising drafts. All authors contributed to the final manuscript.  
45  
46  
47  
48

### 49 **Funding statement**

50 This work was conducted as part of the SPHeRE Programme under Grant No.  
51 SPHeRE/2013/1. I would also like to acknowledge the funding received from the Health  
52 Research Board to conduct the original SSIS-ACE case-control study, Grant No. HRA-2013-  
53  
54  
55  
56  
57  
58  
59  
60



1  
2  
3 PHR-438 and the National Office for Suicide Prevention for providing funding for the  
4 supervision of this research.  
5

### 6 7 **Competing interests**

8  
9 None

### 10 11 **Exclusive licence statement**

12 The Corresponding Author has the right to grant on behalf of all authors and does grant on  
13 behalf of all authors, a worldwide licence to the Publishers and its licensees in perpetuity, in  
14 all forms, formats and media (whether known now or created in the future), to i) publish,  
15 reproduce, distribute, display and store the Contribution, ii) translate the Contribution into  
16 other languages, create adaptations, reprints, include within collections and create  
17 summaries, extracts and/or, abstracts of the Contribution, iii) create any other derivative  
18 work(s) based on the Contribution, iv) to exploit all subsidiary rights in the Contribution, v)  
19 the inclusion of electronic links from the Contribution to third party material where-ever it  
20 may be located; and, vi) licence any third party to do any or all of the above.  
21  
22  
23  
24  
25  
26  
27

### 28 29 **Ethical approval**

30  
31 Ethical approval has been granted from the Clinical Research Ethics Committee of University  
32 College Cork, reference number: ECM 4 (o) 19/01/2016. Ethical approval was also granted  
33 from the Clinical Research Ethics Committee of University College Cork, for the SSIS-ACE  
34 study, reference number: ECM 5(5) 01/04/2014.  
35  
36  
37

### 38 39 **Data sharing statement**

40  
41 The data recorded, transcribed and analysed is very sensitive in nature. Due to the relatively  
42 small number of participants and the specific geographic location, it would not be  
43 appropriate to consider data sharing due to the risk of people being potentially identified.  
44  
45  
46

### 47 48 **References**

- 49  
50  
51  
52  
53  
54  
55  
56  
57  
58  
59  
60
1. World Health Organisation. Preventing Suicide: A Global Imperative. Luxembourg, 2014:89.
  2. Berman AL. Estimating the Population of Survivors of Suicide: Seeking an Evidence Base. *Suicide Life Threat. Behav.* 2011;**41**(1):110-16 doi: 10.1111/j.1943-278X.2010.00009.x[*published Online First: Epub Date*]].
  3. Andriessen K, Rahman B, Draper B, Dudley M, Mitchell PB. Prevalence of exposure to suicide: A meta-analysis of population-based studies. *J. Psychiatr. Res.* 2017;**88**:113-20 doi: <http://dx.doi.org/10.1016/j.jpsychires.2017.01.017>[*published Online First: Epub Date*]].

- 1
- 2
- 3
- 4 4. Pitman A, Osborn D, King M, Erlangsen A. Effects of suicide bereavement on mental health and  
5 suicide risk. *The Lancet Psychiatry* 2014;**1**(1):86-94 doi: 10.1016/s2215-0366(14)70224-  
6 x[published Online First: Epub Date]].
- 7 5. Rostila M, Saarela J, Kawachi I. Suicide following the death of a sibling: a nationwide follow-up  
8 study from Sweden. *BMJ Open* 2013;**3**(4) doi: 10.1136/bmjopen-2013-002618[published  
9 Online First: Epub Date]].
- 10 6. Pitman AL, Osborn DPJ, Rantell K, King MB. Bereavement by suicide as a risk factor for suicide  
11 attempt: a cross-sectional national UK-wide study of 3432 young bereaved adults. *BMJ Open*  
12 2016;**6**(1) doi: 10.1136/bmjopen-2015-009948[published Online First: Epub Date]].
- 13 7. Wilcox HC, Kuramoto SJ, Lichtenstein P, Långström N, Brent DA, Runeson B. Psychiatric morbidity,  
14 violent crime, and suicide among children and adolescents exposed to parental death. *J. Am.  
15 Acad. Child Adolesc. Psychiatry* 2010;**49**(5):514-23
- 16 8. Mittendorfer-Rutz E, Rasmussen F, Lange T. A life-course study on effects of parental markers of  
17 morbidity and mortality on offspring's suicide attempt. *PLoS One* 2012;**7**(12):e51585 doi:  
18 10.1371/journal.pone.0051585[published Online First: Epub Date]].
- 19 9. Mittendorfer-Rutz E, Rasmussen F, Wasserman D. Familial clustering of suicidal behaviour and  
20 psychopathology in young suicide attempters. *Soc. Psychiatry Psychiatr. Epidemiol.*  
21 2008;**43**(1):28-36 doi: 10.1007/s00127-007-0266-0[published Online First: Epub Date]].
- 22 10. Brent D, Melhem N, Donohoe MB, Walker M. The incidence and course of depression in  
23 bereaved youth 21 months after the loss of a parent to suicide, accident, or sudden natural  
24 death. *Am. J. Psychiatry* 2009;**166**(7):786-94 doi: 10.1176/appi.ajp.2009.08081244[published  
25 Online First: Epub Date]].
- 26 11. Bolton JM, Au W, Leslie WD, et al. Parents bereaved by offspring suicide: a population-based  
27 longitudinal case-control study. *JAMA Psychiatry* 2013;**70**(2):158-67 doi:  
28 10.1001/jamapsychiatry.2013.275[published Online First: Epub Date]].
- 29 12. Ellenbogen S, Gratton F. Do They Suffer More? Reflections on Research Comparing Suicide  
30 Survivors to Other Survivors. *Suicide Life Threat. Behav.* 2001;**31**(1):83-90 doi:  
31 10.1521/suli.31.1.83.21315[published Online First: Epub Date]].
- 32 13. Pitman AL, Osborn DP, Rantell K, King MB. The stigma perceived by people bereaved by suicide  
33 and other sudden deaths: A cross-sectional UK study of 3432 bereaved adults. *J. Psychosom.*  
34 *Res.* 2016;**87**:22-9 doi: 10.1016/j.jpsychores.2016.05.009[published Online First: Epub  
35 Date]].
- 36 14. Xu G, Li N. A comparison study on mental health status between suicide survivors and survivors  
37 of accidental deaths in rural China. *J. Psychiatr. Ment. Health Nurs.* 2014;**21**(10):859-65
- 38 15. Erlangsen A, Runeson B, Bolton JM, et al. Association between spousal suicide and mental,  
39 physical, and social health outcomes: A longitudinal and nationwide register-based study.  
40 *JAMA Psychiatry* 2017 doi: 10.1001/jamapsychiatry.2017.0226[published Online First: Epub  
41 Date]].
- 42 16. Miyabayashi S, Yasuda J. Effects of loss from suicide, accidents, acute illness and chronic illness  
43 on bereaved spouses and parents in Japan: Their general health, depressive mood, and grief  
44 reaction. *Psychiatry Clin. Neurosci.* 2007;**61**(5):502-08
- 45 17. de Groot MH, de Keijser J, Neeleman J. Grief Shortly After Suicide And Natural Death: A  
46 Comparative Study Among Spouses and First-Degree Relatives. *Suicide Life Threat. Behav.*  
47 2006;**36**(4):418-31 doi: 10.1521/suli.2006.36.4.418[published Online First: Epub Date]].
- 48 18. Séguin M, Lesage A, Kiely MC. Parental Bereavement After Suicide and Accident: A Comparative  
49 Study. *Suicide Life Threat. Behav.* 1995;**25**(4):489-98 doi: 10.1111/j.1943-  
50 278X.1995.tb00241.x[published Online First: Epub Date]].
- 51 19. Pitman AL, Hunt IM, McDonnell SJ, Appleby L, Kapur N. Support for Relatives Bereaved by  
52 Psychiatric Patient Suicide: National Confidential Inquiry Into Suicide and Homicide Findings.  
53 *Psychiatr. Serv.* 2016;appi.ps.201600004 doi: 10.1176/appi.ps.201600004[published Online  
54 First: Epub Date]].
- 55
- 56
- 57
- 58
- 59
- 60

- 1  
2  
3 20. Pitman AL, Rantell K, Moran P, et al. Support received after bereavement by suicide and other  
4 sudden deaths: a cross-sectional UK study of 3432 young bereaved adults. *BMJ Open*  
5 2017;**7**(5) doi: 10.1136/bmjopen-2016-014487[published Online First: Epub Date]].
- 6 21. Pettersen R, Omerov P, Steineck G, et al. Suicide-Bereaved Siblings' Perception of Health  
7 Services. *Death Stud.* 2015;**39**(6):323-31 9p doi: 10.1080/07481187.2014.946624[published  
8 Online First: Epub Date]].
- 9 22. McMenamy JM, Jordan JR, Mitchell AM. What do Suicide Survivors Tell Us They Need? Results of  
10 a Pilot Study. *Suicide Life Threat. Behav.* 2008;**38**(4):375-89 doi:  
11 10.1521/suli.2008.38.4.375[published Online First: Epub Date]].
- 12 23. Dyregrov K. What do we know about needs for help after suicide in different parts of the world?  
13 A phenomenological perspective. *Crisis* 2011;**32**(6):310-8 doi: 10.1027/0227-  
14 5910/a000098[published Online First: Epub Date]].
- 15 24. Dyregrov K. Assistance from local authorities versus survivors' needs for support after suicide  
16 *Death Stud.* 2002;**26**(8):647-68 doi: 10.1080/07481180290088356[published Online First:  
17 Epub Date]].
- 18 25. Brown J, Evans-Lacko S, Aschan L, Henderson MJ, Hatch SL, Hotopf M. Seeking informal and  
19 formal help for mental health problems in the community: a secondary analysis from a  
20 psychiatric morbidity survey in South London. *BMC Psychiatry* 2014;**14**(1):275 doi:  
21 10.1186/s12888-014-0275-y[published Online First: Epub Date]].
- 22 26. Wilson A, Marshall A. The support needs and experiences of suicidally bereaved family and  
23 friends. *Death Stud.* 2010;**34**(7):625-40
- 24 27. Sugrue JL, McGilloway S, Keegan O. The Experiences of Mothers Bereaved by Suicide: An  
25 Exploratory Study. *Death Stud.* 2013;**38**(2):118-24 doi:  
26 10.1080/07481187.2012.738765[published Online First: Epub Date]].
- 27 28. McKinnon JM, Chonody J. Exploring the Formal Supports Used by People Bereaved Through  
28 Suicide: A Qualitative Study. *Social Work in Mental Health* 2014;**12**(3):231-48 doi:  
29 10.1080/15332985.2014.889637[published Online First: Epub Date]].
- 30 29. Hjelmeland H, Knizek BL. Why we need qualitative research in suicidology. *Suicide Life Threat.*  
31 *Behav.* 2010;**40**(1):74-80 doi: 10.1521/suli.2010.40.1.74[published Online First: Epub Date]].
- 32 30. Shields C, Kavanagh M, Russo K. A Qualitative Systematic Review of the Bereavement Process  
33 Following Suicide. *Omega: Journal of Death & Dying* 2017;**74**(4):426-54 doi:  
34 10.1177/0030222815612281[published Online First: Epub Date]].
- 35 31. Rogers J, Apel S. Revitalizing suicidology: A call for mixed methods designs. *Suicidology Online*  
36 2010;**1**:95-98
- 37 32. Creswell JW. *A Concise Introduction to Mixed Methods Research.* Los Angeles: SAGE Publications,  
38 2015.
- 39 33. Spillane A, Larkin C, Corcoran P, Matvienko-Sikar K, Arensman E. What are the physical and  
40 psychological health effects of suicide bereavement on family members? Protocol for an  
41 observational and interview mixed-methods study in Ireland. *BMJ Open* 2017;**7**(3):e014707  
42 doi: 10.1136/bmjopen-2016-014707[published Online First: Epub Date]].
- 43 34. Rosenberg ML, Davidson LE, Smith JC, et al. Operational criteria for the determination of suicide.  
44 *J. Forensic Sci.* 1988;**33**(6):1445-56
- 45 35. Isometsä ET. Psychological autopsy studies – a review. *Eur. Psychiatry* 2001;**16**(7):379-85 doi:  
46 [http://dx.doi.org/10.1016/S0924-9338\(01\)00594-6](http://dx.doi.org/10.1016/S0924-9338(01)00594-6)[published  
47 Online First: Epub Date]].
- 48 36. Conner KR, Beautrais AL, Brent DA, Conwell Y, Phillips MR, Schneider B. The next generation of  
49 psychological autopsy studies. Part I. Interview content. *Suicide Life Threat. Behav.*  
50 2011;**41**(6):594-613 doi: 10.1111/j.1943-278X.2011.00057.x[published Online First: Epub  
51 Date]].
- 52 37. Freuchen A, Kjelsberg E, Grøholt B. Suicide or accident? A psychological autopsy study of suicide  
53 in youths under the age of 16 compared to deaths labeled as accidents. *Child and adolescent*  
54  
55  
56  
57  
58  
59  
60

- 1  
2  
3 psychiatry and mental health 2012;**6**:30-30 doi: 10.1186/1753-2000-6-30[published Online  
4 First: Epub Date]].
- 5 38. Wong PWC, Chan WSC, Chen EYH, Chan SSM, Law YW, Yip PSF. Suicide among adults aged 30–  
6 49: A psychological autopsy study in Hong Kong. *BMC Public Health* 2008;**8**:147-47 doi:  
7 10.1186/1471-2458-8-147[published Online First: Epub Date]].
- 8 39. Lovibond PF, Lovibond SH. The structure of negative emotional states: comparison of the  
9 Depression Anxiety Stress Scales (DASS) with the Beck Depression and Anxiety Inventories.  
10 *Behav. Res. Ther.* 1995;**33**(3):335-43
- 11 40. Lovibond SH, Lovibond PF. *Manual for the Depression Anxiety & Stress Scales*. 2nd Edition ed.  
12 Sydney Psychology Foundation 1995.
- 13 41. Cheung T, Wong SY, Wong KY, et al. Depression, Anxiety and Symptoms of Stress among  
14 Baccalaureate Nursing Students in Hong Kong: A Cross-Sectional Study. *Int. J. Environ. Res.*  
15 *Public Health* 2016;**13**(8) doi: 10.3390/ijerph13080779[published Online First: Epub Date]].
- 16 42. Parkitny L, McAuley J. The Depression Anxiety Stress Scale (DASS). *J. Physiother.* 2010;**56**(3):204  
17 doi: 10.1016/S1836-9553(10)70030-8[published Online First: Epub Date]].
- 18 43. Braun V, Clarke V. Using thematic analysis in psychology. *Qualitative Research in Psychology*  
19 2006;**3**(2):77-101 doi: 10.1191/1478088706qp0630a[published Online First: Epub Date]].
- 20 44. Omerov P, Steineck G, Dyregrov K, Runeson B, Nyberg U. The ethics of doing nothing. Suicide-  
21 bereavement and research: ethical and methodological considerations. *Psychol. Med.*  
22 2014;**44**(16):3409-20
- 23 45. Melhem NM, Walker M, Moritz G, Brent DA. Antecedents and sequelae of sudden parental death  
24 in offspring and surviving caregivers. *Arch. Pediatr. Adolesc. Med.* 2008;**162**(5):403-10 doi:  
25 10.1001/archpedi.162.5.403[published Online First: Epub Date]].
- 26 46. Sinclair SJ, Siefert CJ, Slavin-Mulford JM, Stein MB, Renna M, Blais MA. Psychometric evaluation  
27 and normative data for the depression, anxiety, and stress scales-21 (DASS-21) in a  
28 nonclinical sample of U.S. adults. *Eval. Health Prof.* 2012;**35**(3):259-79 doi:  
29 10.1177/0163278711424282[published Online First: Epub Date]].
- 30 47. Henry JD, Crawford JR. The short-form version of the Depression Anxiety Stress Scales (DASS-21):  
31 Construct validity and normative data in a large non-clinical sample. *Br. J. Clin. Psychol.*  
32 2005;**44**(2):227-39 doi: 10.1348/014466505X29657[published Online First: Epub Date]].
- 33 48. Grad OT, Clark S, Dyregrov K, Andriessen K. What helps and what hinders the process of surviving  
34 the suicide of somebody close? *Crisis* 2004;**25**(3):134-9 doi: 10.1027/0227-  
35 5910.25.3.134[published Online First: Epub Date]].
- 36 49. Andriessen K, Krysinska K. Essential questions on suicide bereavement and postvention.  
37 *International Journal of Environmental Research & Public Health* [Electronic Resource]  
38 2012;**9**(1):24-32
- 39 50. Pritchard C, Hansen L. Examining undetermined and accidental deaths as source of 'under-  
40 reported-suicide' by age and sex in twenty Western countries. *Community Ment. Health J.*  
41 2015;**51**(3):365-76 doi: 10.1007/s10597-014-9810-z[published Online First: Epub Date]].
- 42 51. Bakst SS, Braun T, Zucker I, Amitai Z, Shohat T. The accuracy of suicide statistics: are true suicide  
43 deaths misclassified? *Soc. Psychiatry Psychiatr. Epidemiol.* 2016;**51**(1):115-23 doi:  
44 10.1007/s00127-015-1119-x[published Online First: Epub Date]].
- 45 52. Chang SS, Sterne JA, Lu TH, Gunnell D. 'Hidden' suicides amongst deaths certified as  
46 undetermined intent, accident by pesticide poisoning and accident by suffocation in Taiwan.  
47 *Soc. Psychiatry Psychiatr. Epidemiol.* 2010;**45**(2):143-52 doi: 10.1007/s00127-009-0049-  
48 x[published Online First: Epub Date]].
- 49 53. Dyregrov K, Nordanger D, Dyregrov A. Predictors of psychosocial distress after suicide, SIDS and  
50 accidents. *Death Stud.* 2003;**27**(2):143-65 doi: 10.1080/07481180302892[published Online  
51 First: Epub Date]].
- 52  
53  
54  
55  
56  
57  
58  
59  
60

1  
2  
3  
4  
5  
6  
7  
8  
9  
10  
11  
12  
13  
14  
15  
16  
17  
18  
19  
20  
21  
22  
23  
24  
25  
26  
27  
28  
29  
30  
31  
32  
33  
34  
35  
36  
37  
38  
39  
40  
41  
42  
43  
44  
45  
46  
47  
48  
49  
50  
51  
52  
53  
54  
55  
56  
57  
58  
59  
60

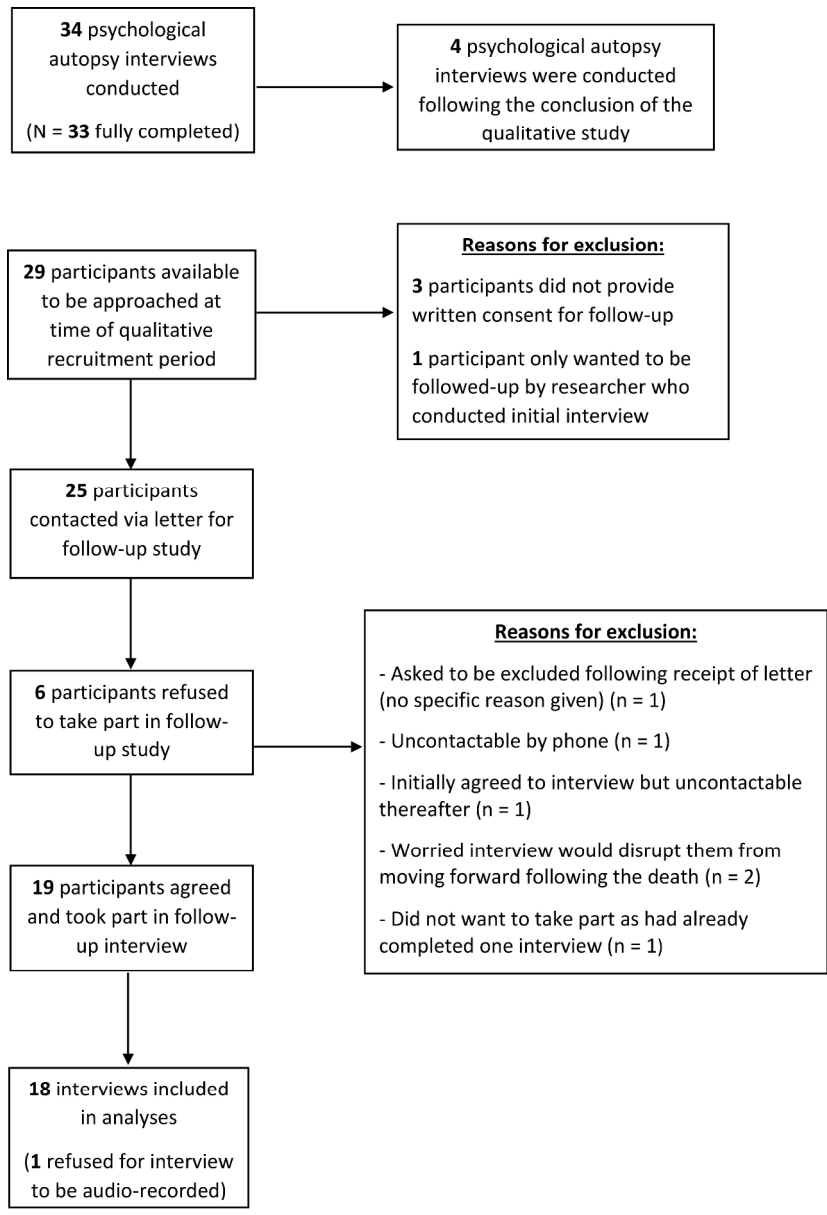

**Figure 1:** Flowchart of recruitment process for SSIS-ACE study

232x339mm (300 x 300 DPI)

## Consolidated criteria for reporting qualitative studies (COREQ): 32-item checklist

Developed from:

Tong A, Sainsbury P, Craig J. Consolidated criteria for reporting qualitative research (COREQ): a 32-item checklist for interviews and focus groups. *International Journal for Quality in Health Care*. 2007. Volume 19, Number 6: pp. 349 – 357

**YOU MUST PROVIDE A RESPONSE FOR ALL ITEMS. ENTER N/A IF NOT APPLICABLE**

| No. Item                                       | Guide questions/description                                                                                                                              | Reported on Page # |
|------------------------------------------------|----------------------------------------------------------------------------------------------------------------------------------------------------------|--------------------|
| <b>Domain 1: Research team and reflexivity</b> |                                                                                                                                                          |                    |
| <i>Personal Characteristics</i>                |                                                                                                                                                          |                    |
| 1. Interviewer/facilitator                     | Which author/s conducted the interview or focus group?                                                                                                   | 6 (in protocol)    |
| 2. Credentials                                 | What were the researcher's credentials?<br>E.g. PhD, MD                                                                                                  | 6 (in protocol)    |
| 3. Occupation                                  | What was their occupation at the time of the study?                                                                                                      | 6 (in protocol)    |
| 4. Gender                                      | Was the researcher male or female?                                                                                                                       | 6 (in protocol)    |
| 5. Experience and training                     | What experience or training did the researcher have?                                                                                                     | 6 (in protocol)    |
| <i>Relationship with participants</i>          |                                                                                                                                                          |                    |
| 6. Relationship established                    | Was a relationship established prior to study commencement?                                                                                              | 3 (in protocol)    |
| 7. Participant knowledge of the interviewer    | What did the participants know about the researcher? e.g. personal goals, reasons for doing the research                                                 | 4 (in protocol)    |
| 8. Interviewer characteristics                 | What characteristics were reported about the interviewer/facilitator? e.g. Bias, assumptions, reasons and interests in the research topic                | 6 (in protocol)    |
| <b>Domain 2: study design</b>                  |                                                                                                                                                          |                    |
| <i>Theoretical framework</i>                   |                                                                                                                                                          |                    |
| 9. Methodological orientation and Theory       | What methodological orientation was stated to underpin the study? e.g. grounded theory, discourse analysis, ethnography, phenomenology, content analysis | 3 (in protocol)    |
| <i>Participant selection</i>                   |                                                                                                                                                          |                    |
| 10. Sampling                                   | How were participants selected? e.g. purposive, convenience, consecutive, snowball                                                                       | 5-6                |
| 11. Method of approach                         | How were participants approached? e.g. face-to-face, telephone, mail, email                                                                              | 5                  |
| 12. Sample size                                | How many participants were in the study?                                                                                                                 | 5-6, 9             |



|                                        |                                                                                                                                 |                      |
|----------------------------------------|---------------------------------------------------------------------------------------------------------------------------------|----------------------|
| 13. Non-participation                  | How many people refused to participate or dropped out? Reasons?                                                                 | 7                    |
| <i>Setting</i>                         |                                                                                                                                 |                      |
| 14. Setting of data collection         | Where was the data collected? e.g. home, clinic, workplace                                                                      | 8                    |
| 15. Presence of non-participants       | Was anyone else present besides the participants and researchers?                                                               | 3 (in protocol)      |
| 16. Description of sample              | What are the important characteristics of the sample? e.g. demographic data, date                                               | 9, 16-17             |
| <i>Data collection</i>                 |                                                                                                                                 |                      |
| 17. Interview guide                    | Were questions, prompts, guides provided by the authors? Was it pilot tested?                                                   | 5 (in protocol)      |
| 18. Repeat interviews                  | Were repeat inter views carried out? If yes, how many?                                                                          | 5                    |
| 19. Audio/visual recording             | Did the research use audio or visual recording to collect the data?                                                             | 5                    |
| 20. Field notes                        | Were field notes made during and/or after the inter view or focus group?                                                        | 4                    |
| 21. Duration                           | What was the duration of the inter views or focus group?                                                                        | 8                    |
| 22. Data saturation                    | Was data saturation discussed?                                                                                                  | 4                    |
| 23. Transcripts returned               | Were transcripts returned to participants for comment and/or correction?                                                        | 6 (in protocol)      |
| <b>Domain 3: analysis and findings</b> |                                                                                                                                 |                      |
| <i>Data analysis</i>                   |                                                                                                                                 |                      |
| 24. Number of data coders              | How many data coders coded the data?                                                                                            | 9                    |
| 25. Description of the coding tree     | Did authors provide a description of the coding tree?                                                                           | 9                    |
| 26. Derivation of themes               | Were themes identified in advance or derived from the data?                                                                     | 5-6 (in protocol), 9 |
| 27. Software                           | What software, if applicable, was used to manage the data?                                                                      | 9                    |
| 28. Participant checking               | Did participants provide feedback on the findings?                                                                              | 6 (in protocol)      |
| <i>Reporting</i>                       |                                                                                                                                 |                      |
| 29. Quotations presented               | Were participant quotations presented to illustrate the themes/findings? Was each quotation identified? e.g. participant number | 9                    |
| 30. Data and findings consistent       | Was there consistency between the data presented and the findings?                                                              | 19-20                |
| 31. Clarity of major themes            | Were major themes clearly presented in the findings?                                                                            | 9-16                 |
| 32. Clarity of minor themes            | Is there a description of diverse cases or discussion of minor themes?                                                          | 9-16                 |

**Once you have completed this checklist, please save a copy and upload it as part of your submission. When requested to do so as part of the upload process, please select the file type: *Checklist*. You will NOT be able to proceed with**

1  
2  
3 **submission unless the checklist has been uploaded. Please DO NOT include this**  
4 **checklist as part of the main manuscript document. It must be uploaded as a**  
5 **separate file.**  
6  
7  
8  
9  
10  
11  
12  
13  
14  
15  
16  
17  
18  
19  
20  
21  
22  
23  
24  
25  
26  
27  
28  
29  
30  
31  
32  
33  
34  
35  
36  
37  
38  
39  
40  
41  
42  
43  
44  
45  
46  
47  
48  
49  
50  
51  
52  
53  
54  
55  
56  
57  
58  
59  
60

For peer review only



# BMJ Open

## What are the physical and psychological health effects of suicide bereavement on family members? An observational and interview mixed-methods study in Ireland

|                                 |                                                                                                                                                                                                                                                                                                                                                                                                                                                                                                                                                                                                                                                                       |
|---------------------------------|-----------------------------------------------------------------------------------------------------------------------------------------------------------------------------------------------------------------------------------------------------------------------------------------------------------------------------------------------------------------------------------------------------------------------------------------------------------------------------------------------------------------------------------------------------------------------------------------------------------------------------------------------------------------------|
| Journal:                        | <i>BMJ Open</i>                                                                                                                                                                                                                                                                                                                                                                                                                                                                                                                                                                                                                                                       |
| Manuscript ID                   | bmjopen-2017-019472.R1                                                                                                                                                                                                                                                                                                                                                                                                                                                                                                                                                                                                                                                |
| Article Type:                   | Research                                                                                                                                                                                                                                                                                                                                                                                                                                                                                                                                                                                                                                                              |
| Date Submitted by the Author:   | 10-Nov-2017                                                                                                                                                                                                                                                                                                                                                                                                                                                                                                                                                                                                                                                           |
| Complete List of Authors:       | Spillane, Ailbhe; University College Cork National University of Ireland, School of Public Health; National Suicide Research Foundation<br>Matvienko-Sikar, Karen; University College Cork National University of Ireland, School of Public Health<br>Larkin, Celine; University of Massachusetts Medical School Department of Medicine, Department of Emergency Medicine<br>Corcoran, Paul; University College Cork, School of Public Health; Cork University Maternity Hospital, Department of Obstetrics and Gynaecology<br>Arensman, Ella ; University College Cork National University of Ireland, School of Public Health; National Suicide Research Foundation |
| <b>Primary Subject Heading</b>: | Mental health                                                                                                                                                                                                                                                                                                                                                                                                                                                                                                                                                                                                                                                         |
| Secondary Subject Heading:      | Public health, Qualitative research, Health services research                                                                                                                                                                                                                                                                                                                                                                                                                                                                                                                                                                                                         |
| Keywords:                       | Mixed-methods, Suicide bereavement, Family members, Morbidity, Health                                                                                                                                                                                                                                                                                                                                                                                                                                                                                                                                                                                                 |
|                                 |                                                                                                                                                                                                                                                                                                                                                                                                                                                                                                                                                                                                                                                                       |

SCHOLARONE™  
Manuscripts

1  
2  
3 **What are the physical and psychological health effects of suicide bereavement on family**  
4 **members? An observational and interview mixed-methods study in Ireland**  
5  
6  
7

8  
9 Ailbhe Spillane<sup>1,2\*</sup>, Karen Matvienko-Sikar<sup>1</sup>, Celine Larkin<sup>3</sup>, Paul Corcoran<sup>1,4</sup>, Ella Arensman<sup>1,2</sup>  
10  
11  
12

13  
14 \*Corresponding author: Ms Ailbhe Spillane ([ailbhe.spillane@ucc.ie](mailto:ailbhe.spillane@ucc.ie); 00353 21 4205544)  
15  
16

- 17  
18 1. School of Public Health, 4<sup>th</sup> Floor Western Gateway Building, Western Road, Cork,  
19 Ireland  
20  
21  
22 2. National Suicide Research Foundation, Room 4.28, Western Gateway Building,  
23 Western Road, Cork, Ireland  
24  
25  
26  
27 3. Department of Emergency Medicine, University of Massachusetts Medical School,  
28 Worcester, MA, USA  
29  
30  
31 4. Department of Obstetrics and Gynaecology, Cork University Maternity Hospital, 5th  
32 Floor, Wilton, Cork, Ireland  
33  
34  
35

36 **Keywords:** mixed-methods, suicide bereavement, family members, morbidity, health  
37  
38

39  
40 **Word count:** 7,090  
41  
42  
43  
44  
45  
46  
47  
48  
49  
50  
51  
52  
53  
54  
55

56 **ABSTRACT**  
57  
58  
59  
60

1  
2  
3 **Objectives:** Research focussing on the impact of suicide bereavement on family members'  
4 physical and psychological health is scarce. The aim of this study was to examine how family  
5 members have been physically and psychologically affected following suicide bereavement.  
6 A secondary objective of the study was to describe the needs of family members bereaved  
7 by suicide.  
8  
9

10  
11  
12 **Design:** A mixed-methods study was conducted, using qualitative semi-structured interviews  
13 and additional quantitative self-report measures of depression, anxiety and stress (DASS-  
14 21).  
15  
16

17  
18 **Setting:** Consecutive suicide cases and next-of-kin were identified by examining coroner's  
19 records in Cork City and County, Ireland from October 2014 to May 2016.  
20  
21

22 **Participants:** Eighteen family members bereaved by suicide took part in a qualitative  
23 interview. They were recruited from the Suicide Support and Information System: A Case-  
24 Control Study (SSIS-ACE) where family members bereaved by suicide (n = 33) completed  
25 structured measures of their wellbeing.  
26  
27

28  
29 **Results:** Qualitative findings indicated three superordinate themes in relation to  
30 experiences following suicide bereavement: (1) Co-occurrence of grief and health reactions;  
31 (2) disparity in supports after suicide; and (3) reconstructing life after deceased's suicide.  
32 Initial feelings of guilt, blame, shame and anger often manifested in enduring physical,  
33 psychological and psychosomatic difficulties. Support needs were diverse and were often  
34 related to the availability or absence of informal support by family or friends. Quantitative  
35 results indicated that the proportion of respondents above the DASS-21 cut-offs  
36 respectively were 24% for depression, 18% for anxiety and 27% for stress.  
37  
38

39  
40 **Conclusions:** Healthcare professionals' awareness of the adverse physical and  
41 psychosomatic health difficulties experienced by family members bereaved by suicide is  
42 essential. Pro-actively facilitating support for this group could help to reduce the negative  
43 health sequelae. The effects of suicide bereavement are wide-ranging, including high levels  
44 of stress, depression, anxiety, and physical health difficulties.  
45  
46  
47  
48  
49  
50  
51  
52  
53  
54  
55  
56  
57  
58  
59  
60

### Strengths and limitations of the study

- This study addressed a specific knowledge gap by examining the physical and psychological health effects of suicide bereavement on family members in Ireland
- The study covered consecutive cases of suicide, which increases the external validity of the outcomes
- This study screened open verdict deaths with validated screening criteria to identify probable suicides. Therefore, this study benefits from the inclusion of probable suicide cases that would otherwise have not been included in the study
- Physical health issues were self-reported and were not objectively measured

### INTRODUCTION

Suicide is a significant global concern, with approximately 800,000 people taking their own lives every year[1]. Consequently, for every suicide, up to 60 people are intimately affected[2]. Recent research also indicates that 1 in 20 people have experienced a suicide in the past year, and 1 in 5 during their lifetime[3]. Quantitative research has highlighted adverse mental health outcomes of suicide bereavement, including heightened risk of suicide[4-6], attempted suicide[6-9], depression[10 11], psychiatric morbidity[7] and psychiatric admission[11]. However, qualitative research examining physical and psychosomatic health morbidity in the aftermath of suicide bereavement is sparse.

To date, several quantitative studies have been conducted to investigate whether suicide bereavement confers a higher risk of physical morbidity compared to other causes of death [4 6 12-15]. People bereaved by suicide had poorer general health[16 17], reported more pain[17], reported more physical illnesses[18] and disorders including cardiovascular disease, chronic obstructive pulmonary disease, hypertension and diabetes[11]. In addition, suicide-bereaved family members visited a GP more often[18] and had significantly higher rates of outpatient physician visits for physical illnesses[11] than non-suicide bereaved individuals. These negative health outcomes illustrate the importance of timely and effective health services and psychosocial supports for those bereaved by suicide, many of whom may carry existing health adversities prior to the death[11].

Previous research has emphasised the importance of access to support for people bereaved by suicide [19 20]. Feelings of depression, anxiety, guilt, extreme sadness, anger

1  
2  
3 and nightmares motivate help-seeking in people bereaved by suicide[21 22]. Some research  
4 has been conducted to explore the perceived needs of family members bereaved by suicide.  
5 Both formal support, in the form of health service use, and informal support help from  
6 friends, families or other non-medical sources, were found to be important. It is critical to  
7 consider that each type of support addresses different needs[23-25]. A quarter of those  
8 bereaved by sudden natural death reported that they were most affected by the death in  
9 the first week[20]. One third of those bereaved by unnatural causes of death reported that  
10 they were most affected in the first six months following the death[20]. One study noted  
11 that first-degree relatives had greater need for formal support than second-degree and non-  
12 relatives[26]. Compared to those bereaved by sudden natural causes of death, people  
13 bereaved by suicide were less likely to receive informal support and immediate support  
14 following the death, and were more likely to experience a delay in receiving support [20].  
15  
16  
17  
18  
19  
20  
21  
22  
23

24 Although a significant number of quantitative studies have examined the association  
25 between suicide bereavement and subsequent physical health outcomes, the topic has  
26 rarely been examined from an experiential perspective using qualitative research involving a  
27 non-selective sample[27 28]. Researchers are beginning to identify the need for further  
28 qualitative research in this area[29], to take into account the inherent complexity of grieving  
29 and social processes[12]. A recent qualitative systematic review identified three areas that  
30 are important for those bereaved by suicide; feelings experienced by those bereaved by  
31 suicide, the meaning-making process following bereavement, and the social context[30].  
32 Specifically, the authors note that those bereaved by suicide experienced a range of grief  
33 reactions, including shame, stigma, blame, guilt, emptiness and a lack of social supports  
34 following the bereavement[30]. In addition, other common feelings included anger and  
35 depression[28]. However, this review only included studies on the thematic processes of  
36 suicide bereavement and did not report on health outcomes following suicide bereavement.  
37  
38  
39  
40  
41  
42  
43  
44  
45  
46

47 While the mental and physical health effects of suicide bereavement have been  
48 examined in quantitative studies, they lack the detailed unique insight into the physical  
49 health experiences of people bereaved by suicide. The primary aim of this research is to  
50 examine how people have been physically and psychologically affected by a family  
51 member's suicide. A secondary objective of the study is to describe the support needs  
52 required by family members bereaved by suicide. The current mixed-methods approach  
53  
54  
55  
56  
57

benefits from leveraging the advantages of both quantitative and qualitative methodological approaches[31], while being able to provide a more comprehensive and in-depth consideration of the research problem under investigation[32].

## **METHODS**

### **Study design and setting**

This study applied a mixed-methods approach. The qualitative study was linked to a larger case-control study, the Suicide Support and Information System: A Case-Control Study (SSIS-ACE, January 2014-March 2017). Qualitative interviews were supplemented with quantitative data of suicide-bereaved family members' wellbeing, which was collected as part of the larger case-control study. Further information on the study design has been reported elsewhere[33] and is available as supplementary file 1.

### **Sample and recruitment**

#### *Qualitative study*

A subset of the 33 participants over the age of eighteen who took part in the SSIS-ACE study and who consented for further follow-up were approached to take part in the qualitative study. At the time of the qualitative study recruitment, there were 29 participants in the larger study to sample from. Three of these did not provide written consent for further follow-up and one only wanted to be contacted again by the researcher that conducted the initial psychological autopsy interview. Therefore, 25 individuals were initially contacted via a letter. Nineteen participants agreed to the interview but one participant did not consent for the interview to be audio-recorded and was therefore excluded from the qualitative analysis. Therefore, eighteen interviews were conducted (female = 11; male = 7), which yielded a response rate of 75%. In one instance, two family members were interviewed together at their request. No repeat interviews were conducted. Interviewees were a spouse (n = 7), a parent (n = 5), a sibling (n = 2) and a child (n = 4). Full details of the recruitment process are illustrated in figure 1. Mean time since bereavement during the qualitative interviews was 27.6 months (range: 15- 38 months). Half of all family members interviewed (n = 9) found the deceased's body, while the other half (n = 9) were informed of the death by other family members or a member of the police force.

### *Quantitative study*

The quantitative data outlined in this paper was collected as part of a larger case-control study (SSIS-ACE). In SSIS-ACE, a senior researcher reviewed records of consecutive suicides and open verdict files from inquests held by all coroners in Cork, Ireland over a 19-month period. Open verdict files that met the Rosenberg criteria[34] for the determination of suicide[34] were eligible for inclusion in the study as probable suicides[33]. Relatives were eligible to participate in an interview for the case-control study if they were well-acquainted enough with the deceased to provide detailed information with respect to the deceased's life and were over the age of 14 years. Family members were contacted by letter and then by telephone and invited to participate in the psychological autopsy interview. 'Psychological autopsy' is a specific research method which involves retrospectively collecting information on aspects of a suicide decedents life, including socio-demographics, previous self-harm, mental health, physical health, personality traits and treatment provided by health care professionals before the suicide[35]. This information is primarily gathered via structured interviews with family or friends of the deceased and also information obtained by health professionals who treated the deceased[35]. The study took into account elements of the psychological autopsy approach according to Conner and colleagues[36]. Thirty-four family members agreed to take part but one interview was not fully completed and was excluded from analyses. Therefore, full interviews were completed with 33 family members (44%). This response rate is similar to other psychological autopsy studies[37 38]. The mean time since bereavement during the psychological autopsy interviews was 10.2 months (range: 6 – 21 months).

1  
2  
3  
4  
5  
6  
7  
8  
9  
10  
11  
12  
13  
14  
15  
16  
17  
18  
19  
20  
21  
22  
23  
24  
25  
26  
27  
28  
29  
30  
31  
32  
33  
34  
35  
36  
37  
38  
39  
40  
41  
42  
43  
44  
45  
46  
47  
48  
49  
50  
51  
52  
53  
54  
55  
56  
57  
58  
59  
60

For peer review only

**Insert Figure 1 here**

**Figure 1:** Flowchart of recruitment process for SSIS-ACE study



## Measures

### *Qualitative study*

Semi-structured interviews (n = 18) were conducted with the aid of a topic guide[33] in order to explore the experiences of people bereaved by the suicide. Interviews began by asking participants about the relationship they had with the deceased. The physical and emotional impact of the bereavement on them was then explored. The impact of the bereavement on the family and their social life was then explored. In addition, participants were asked about what support services they received and what they feel suicide-bereaved family members require in the immediate aftermath and the medium and long-term. Participants' permission to audio-record the interview was obtained. Thirteen interviews took place in the participant's home, two in university research offices and three at a neutral location selected by participants. All interviews took place in a single session. Mean length of interviews was 97.5 minutes (range 42-180 minutes).

### *Quantitative study*

Family members' wellbeing was assessed using the 21-item version of the Depression, Anxiety, and Stress Scale (DASS-21) [39]. This scale assesses a participant's wellbeing in the past week. The scale successfully differentiates between the three affective states while also demonstrating consistency between clinical and non-clinical samples[39]. Median scores of depression, anxiety and stress, together with dichotomised variables were presented. Recommended cut-off scores to generate severity level ranges from normal, mild, moderate, severe and extremely severe categories[40]. However, due to small numbers in the study, it was not possible to subdivide the sample by these five categories. Therefore, participants who met the criteria for depression, anxiety and/or stress at the levels between mild and extremely severe were collapsed into a category of above the "normal" cut-off and those below these scores were classified as "normal". Scores of  $\geq 10$  for depression,  $\geq 8$  for anxiety and  $\geq 15$  for stress were considered indicative of the presence of depression, anxiety, or stress respectively. These cut-off points have been used previously [39 41] and are considered diagnostic indicators of potential diagnoses of depression, anxiety and/or stress [40 42]. All statistical analyses were conducted using SPSS Version 22.

## Data analysis

### *Qualitative study*

Qualitative data were analysed using thematic analysis, which is a flexible method that allows for a variety of ontological and epistemological stances[43]. Thematic analysis involves a number of steps, including familiarising oneself with the data, generating initial codes, searching, reviewing and finally, defining themes[43]. Two authors (AS and KMS) coded the data and all stages of coding and development of themes were discussed with the research team. NVIVO 11 software facilitated the organisation of the data. In the absence of standardised guidelines to report mixed-methods research, the Consolidated Criteria for Reporting Qualitative Research (COREQ) checklist was used and is available as supplementary file 2.

### *Quantitative study*

Descriptive statistics were used to present information on the age, gender and marital status of the suicide decedents, the method of suicide, if a suicide note was present and if there was a history of self-harm prior to the death. The age and gender of the family members and their relationship to the deceased were also presented using descriptive statistics. The characteristics of those interviewed for the follow-up qualitative study was compared with those who were not interviewed using Chi-Square and T-tests. Tests of normality indicated the data was non-normal and therefore non-parametric tests were utilised. Median scores and inter-quartile ranges were computed to describe the DASS-21 sub-scales and total score. A Mann-Whitney U test was used to test for differences in wellbeing for males and females and for people bereaved by a hanging or non-hanging suicide.

## RESULTS

### *Qualitative results*

The 18 participants interviewed for the qualitative study did not significantly differ from those not interviewed regarding their gender ( $p = .42$ ), age ( $p = .56$ ), relationship to the deceased ( $p = .69$ ), method of suicide ( $p = .69$ ), their depression ( $p = .49$ ), anxiety ( $p = .08$ ), stress ( $p = .59$ ) and total score ( $p = .28$ ) on the DASS-21 scale. Three main themes were

1  
2  
3 identified from the analysis process: 'entanglement of grief and health reactions', 'disparity  
4 in support after suicide' and 'reconstructing life after deceased's suicide'.  
5

#### 6 7 *Co-occurrence of grief and health reactions*

8  
9 This first superordinate theme has two subordinate themes; 'immediate grief reactions' and  
10 'enduring physical, psychological and psychosomatic health difficulties'. It was apparent  
11 throughout the interviews that physical, psychosomatic and psychological health  
12 experiences were often tied in with grief reactions, including blame, guilt and extreme  
13 sadness. Additionally, reactions were influenced by contextual factors, such as whether the  
14 participant found their family members body and were informed of the death by others.  
15

16  
17 Immediate grief reactions experienced by participants ranged from guilt, blame, shame,  
18 sadness and relief. Participants often felt angry, both towards the deceased and also  
19 healthcare professionals who cared for the deceased. Conversely, two participants were not  
20 angry with their loved one for taking their own lives: one participant felt relieved their  
21 family member was no longer suffering psychologically and "felt she had escaped, she got  
22 out of it" and revealed it "alleviated some of the pressure" as "she was going to get worse  
23 and worse". Feelings of numbness were reported, with some participants not wanting to  
24 believe that their loved one was dead. One family member could not believe her sister was  
25 dead until she was given the chance to view her body. The delay in receiving the news about  
26 the death and viewing the body appears to have been especially difficult for her when  
27 acknowledging the death:  
28  
29

30  
31 "I went on then for the night like nothing had happened being honest with you, it was just  
32 numb and I didn't want to believe it until I saw it for myself. That was the Wednesday and  
33 we didn't see her until the Friday" (sibling)  
34  
35

36  
37 Physical reactions experienced at the immediate point of bereavement included nausea,  
38 vomiting, breathlessness, numbness, memory loss, and an inability to stand as "my legs had  
39 just given way". One participant noted an immediate physical change to their health, as  
40 their heart rate escalated upon hearing about the death, which resulted in a diagnosis of  
41 hypertension the following day:  
42  
43  
44  
45  
46  
47  
48  
49  
50  
51  
52  
53  
54  
55  
56  
57  
58  
59  
60

1  
2  
3 “My heart rate went up straight away, through the roof. Actually, I had to see a doctor on  
4 the next day [sic]...and I’m on blood pressure control pills since then and I will be probably  
5  
6 for the rest of my life” (sibling)  
7

8  
9 Other psychosomatic health reactions often noted by participants included physical pain,  
10 severe abdominal pains, loss of appetite, low energy levels and inability to sleep in the  
11 immediate aftermath of the suicide. Some participants attributed their low energy levels to  
12 “the emotion” and “turmoil” associated with their grieving, while others felt it was due to  
13 their disrupted sleeping patterns. Reported problems with sleeping in the immediate  
14 aftermath varied in severity and duration. One participant described how they “couldn’t  
15 sleep at all in the beginning” and another described how they attempted to tire themselves  
16 during the day with walks in an attempt to sleep at night. A number of participants  
17 described experiencing distressing nightmares and visions of the deceased:  
18  
19

20  
21 “The son came in like and he was asking me what I was doing...[deceased] was talking to me,  
22 I was talking to him, he was there like, do you know what I’m saying...I thought he  
23 was, I was out of my bed and the whole lot” (parent).  
24

25  
26 Loss of appetite was reported by some participants as a psychosomatic reaction which often  
27 led to weight loss. Reasons for loss of appetite varied, including nausea due to flashbacks of  
28 finding the body, feelings of depression and despondence following the death:  
29

30  
31 “Food-wise, I’m never hungry, I could stay without it all day...if I have a cup of tea and a bit  
32 of bread in the morning, I’m grand...Since himself has gone, you’re just getting up in the  
33 morning doing the odd old thing, sure what’s the point in doing it like” (spouse).  
34

35  
36 Finding the decedent’s body appeared to induce more severe reactions in some cases which  
37 often extended to longer-term psychological impacts, including depression, anxiety, panic  
38 attacks, post-traumatic stress disorder, suicidal thoughts and suicide attempts.  
39

40  
41 “I was depressed afterwards and I...still have this fuzziness in my head...it’s very hard to  
42 explain. It feels like I’m stressed, stressed, like even small little things I can’t deal with”  
43  
44 (spouse)  
45

46  
47 One participant noted that they were not distressed at finding the body but described the  
48 scene as “calm”, while also providing her with the opportunity to say goodbye to the  
49  
50

1  
2  
3 deceased. It also allowed her to lay “down on the ground beside him and I put my head  
4 down on his chest...he was still warm and everything...I just stayed there for a long...I  
5 suppose it was my way of saying goodbye to him” (sibling).  
6  
7

8  
9 The initial experiences of the majority of family members bereaved by suicide set the stage  
10 for enduring physical, psychological and psychosomatic difficulties in the months following  
11 the bereavement. Firstly, a number of adverse mental health outcomes were reported by  
12 family members including being more concerned about their own mental health,  
13 experiencing suicidal thoughts, suicide attempts, depression, anxiety, post-traumatic stress  
14 disorder (PTSD), nightmares, memory loss and intrusive images of the deceased. One  
15 participant attempted suicide in the months after the suicide but emphasised they did not  
16 want to die but rather to escape the emotional pain and depression:  
17  
18  
19  
20  
21

22  
23 “The morning that it happened, I just woke up and the feeling was so awful just inside my  
24 head, I thought like I just can’t stick this anymore, so that’s why I done it. It was just like to  
25 get away from this awful feeling” (sibling)  
26  
27

28  
29 Ongoing intrusive images of the deceased and how they died were also reported by a  
30 number of participants. These images were not restricted to those who found the body but  
31 were also experienced by those who were informed of the death by others. One participant  
32 was preoccupied with the violent and traumatic nature of the death which resulted in her  
33 still being unable to sleep at night:  
34  
35  
36  
37

38 “I’d be awake all night...and then I’m wrecked during the day. In the dead of night in the  
39 dark I think about how she done it...that would make me ill” (parent)  
40  
41

42 Additionally, a number of participants reported psychosomatic symptoms including, chronic  
43 feelings of low energy/exhaustion, persistent chest pains, breathlessness and physical pain  
44 which endured in the months after deceased’s death. Their health status was often  
45 influenced by their health behaviours. Some family members noted “everything stopped,  
46 the world stopped that day” and tried but failed to resume their normal physical activity.  
47 For others, negative health behaviours, including excessive alcohol consumption and over-  
48 eating were used as a coping mechanism:  
49  
50  
51  
52  
53  
54  
55  
56  
57  
58  
59  
60

1  
2  
3 “I’d drink I’d say [pauses] a bottle of vodka a day and a few pints as well... it’s [the alcohol  
4 consumption] got a bit worse... I don’t know if it’s directly related to it or whether I’m using  
5 it as an excuse” (parent)  
6  
7

8  
9 Importantly, some family members experienced an improvement in health behaviours,  
10 including, increasing their levels of physical activity which benefited fitness levels, healthy  
11 weight loss and aided the grieving process:  
12  
13

14 “I went out to the dancing on a Wednesday night, I said make new friends you know...Ya I’ve  
15 got fitter... That was a big boost for me to chat to people and pass away the week” (spouse)  
16  
17

18 Participants experienced a number of adverse physical health problems in the months after  
19 the deceased’s suicide, including being diagnosed with hypertension, type 1 diabetes and  
20 diverticulitis. Participants attributed these diagnoses to the stress of the deaths:  
21  
22

23  
24 “I was hospitalised again this week with it...the doctor came in and said “you need to stop,  
25 you really need to stop, it’s not cancer but it’s going to affect you for the rest of your life...I  
26 know that’s a consequence of dealing with [deceased’s death]” (child)  
27  
28  
29  
30  
31

### 32 *Disparity in supports after suicide*

33

34  
35 The second superordinate theme has two subordinate subthemes; ‘need for formal support’  
36 and ‘need for informal support’. Participants described requiring a range of supports,  
37 however, these needs were often not fully addressed by the formal and informal support  
38 networks. This disparity in the needs and availability of support impacted on the  
39 participant’s grieving process. Primarily, both formal and informal support were required to  
40 address intense psychological, psychosomatic and physical symptoms brought about by  
41 feelings of anger, guilt and blame:  
42  
43  
44  
45  
46

47 “I went to a bereavement information evening one night before I started any counselling,  
48 they put up on a screen physical symptoms and there was about 20 different things and I  
49 could tick at least 10 of them, shortness of breath, panic attacks, headaches, chest pains,  
50 physical chest pains...crippling abdominal pains...it’s the anger that manifests itself in  
51 physical pain” (spouse)  
52  
53  
54  
55  
56  
57  
58  
59  
60

1  
2  
3 Informal support, in the form of practical and emotional support from family and friends  
4 was as important as formal support to some participants. One participant described how  
5 “every night for so long my parents came over to stay every night”, while another credited  
6 his wife as “the biggest support that I have received”. He went on to say that if he was “just  
7 left to wallow in it”, that he “would have gone into a big black hole over it”. Another  
8 participant emphasized the importance of both informal and formal support following a  
9 suicide:  
10  
11  
12  
13

14  
15 “The love of my family... “come home, we’ll mind you” and they did, that was incredible and  
16 if some poor person doesn’t have that, I really pity them. It’s your family and your friends  
17 that gets you through that, and the counselling” (spouse)  
18  
19  
20

21 Others described how family and friends helped with funeral arrangements, financial  
22 support, preparing or bringing food to the family member and helping with practical jobs  
23 around the house, such as maintaining the house and garden in the weeks and months after  
24 the death:  
25  
26  
27

28  
29 “My friends from down the town would come up every day with food and I would always  
30 forgot they were going to do it [laughs] so they were coming up for about a month with  
31 food, they were so kind... I was embarrassed but I found it helpful” (spouse)  
32  
33  
34

35 In some instances, fractured family relations impeded the family member receiving informal  
36 support. In those instances, the importance of formal support is paramount:  
37

38  
39 “I have a sister but then we fell out over this, I don’t have any contact with them...My  
40 problem is if I was feeling down, I wouldn’t say it to them... [I’d be] very wary of people  
41 because I’ve said things and it’s gone around town...I know I can trust my counsellor or my  
42 doctor or yourself there now” (spouse)  
43  
44  
45

46 Another participant sought formal support as they “needed to speak to somebody outside  
47 of my family because I was upsetting everybody when I wanted to talk”. Seeking formal  
48 support was imperative “to get the counselling, just taking time to reflect on everything and  
49 deal with it”. Two participants noted respectively that there was “no pressure with money”  
50 from the counsellor and if they didn’t have “the money that day she’d say give it to me  
51 when you have it”. A number of participants spoke about having to stop formal support due  
52  
53  
54  
55  
56  
57

1  
2  
3 to financial reasons, with one participant stating that there “should be free counselling for  
4 people bereaved by suicide”:  
5

6  
7 “I hadn’t any steady money coming in, my illness benefit had finished and stuff like that...So  
8 that’s the reason I finished up with him [counsellor]” (spouse)  
9

10  
11 The understanding and flexibility of some bereavement counsellors following the suicide  
12 were hugely valued by participants. However, not all experiences with formal support were  
13 positive, with one person noting that the counsellors were “too shocked to deal with me”,  
14 while another said the counsellor “had the clock ticking”. Participants noted that nobody  
15 proactively contacted them to offer formal support. This point is particularly salient as many  
16 spoke of being unable to seek help themselves or were unsure of what help was required.  
17 Feeling “so awful” and “you don’t even know what you need” were significant barriers to  
18 seeking help while others had to “make the phone calls” and “run after all of them [the  
19 counselling services]”. One participant spoke about how she didn’t approach her own GP for  
20 help “but he never came with a list of things either to see how I was either, here’s a list of  
21 services you can avail of”. She expected him to contact her and she explained “it’s very hard  
22 yourself because you don’t even know what you need”. As a result, she was searching the  
23 internet “to find anything” and spoke about how “things aren’t readily available I think in  
24 this day and age even though mental health is a really important thing”.  
25  
26  
27  
28  
29  
30  
31  
32  
33  
34

35  
36 Some participants wanted to attend a suicide bereavement support group as they felt  
37 counsellors could not “possibly understand what’s going on in my head, like unless they’ve  
38 been through it”. Others spoke of wanting to talk to others “with similar experiences”  
39 because “I think it’s important for me to feel that I’m not the only one going through this”.  
40 Additionally, one participant felt that she would benefit from it “because I do find I’m alone  
41 in my thoughts of it and I’m interested in getting other peoples stories so I can relate [to it]”.  
42 However, no such support groups were available for any of the participants. A small number  
43 of participants reported that they did not require any formal support. One participant spoke  
44 with their husband about whether they needed counselling and both concluded that they  
45 can “hack this” on their own. Specifically, two participants who noted they did not require  
46 formal support were engaging in over-eating and excessive alcohol consumption as coping  
47 mechanisms.  
48  
49  
50  
51  
52  
53  
54  
55  
56  
57  
58  
59  
60



### *Reconstructing life after deceased's suicide*

Each participant was confronted with trying to comprehend, make sense of, and reconstruct aspects of their lives following their family member's suicide. Participants were particularly concerned with aspects of their wellbeing. Some spoke about finding it difficult to look positively to the future. Some participants spoke about moving forward in terms of relationships. One participant spoke about how "he [the deceased] was the person I was supposed to spend the rest of my life with and looking to the future without him is...it's hard for me to do". She explains how people often say to her "you're young, you're going to find someone else...and have more kids". However, she feels "that's not for me now... I feel like I had that experience with him, and I feel like I don't want that with anyone else ever". Some participants spoke about seeking new relationships following their partner's death. One participant spoke about how her friends and her counsellor broached the topic of a new relationship with her and she felt "why not...I have an awful lot of love to give". Seeking new relationships and friendships was an important aspect of moving forward for some participants as "there was lots of times where I wouldn't go out...but eventually I got it into my head, I went out to the dancing on a Wednesday night, I said make new friends...and then I met this new girl last year before Christmas".

In terms of wellbeing, a small minority of participants were unable to experience positive thoughts following the suicide. One spoke about wondering "what's the point in living...that's what's killing me". Another participant spoke about she no longer socialises since her partner's death and becomes depressed following constant rumination about his death:

"I don't socialise the way I used to before with other people...the tv might be on but I'd have no interest, I'd be just thinking away to myself and get depressed about it then" (spouse)

Conversely, the majority of participants spoke about how while they had negative thoughts, they were often able to balance these with more positive thoughts. One participant noted that simple things like turning on the radio so there's "something on in the house" or watching a DVD with his children helps as he "enjoys it when we're all together". Various other social activities and past-times such as walking and gardening were endorsed by some as helping during the grieving process. One participant spoke about how she uses yoga as a

1  
2  
3 means of “being present” and to tell herself that she’s “ok” even when “there are still  
4 images in my head” after finding the deceased. A further participant stated they were “very  
5 positive” and engaged in walking and “a bit of photography” which helped him in “hanging  
6 together fairly well”.  
7  
8  
9

10 Part of this reconstruction was also about reappraising what was important to them and  
11 how they thought about life. Some participants chose to make big life changes after the  
12 death, including moving homes, changing jobs or completely disengaging from the work  
13 environment:  
14  
15  
16

17  
18 “I haven’t gone back to my old job in [big city], you know life has changed and I was working  
19 long days and didn’t really have a life, now, I’m looking back and saying, there’s a little bit  
20 more to life than that you know?” (spouse)  
21  
22

23 Two participants moved house soon after the death. One described that she “couldn’t stay  
24 there” as the death occurred in the house. The other participant was forced to sell the  
25 house to pay off the debts the deceased had accumulated but had hidden from his partner.  
26 The participant felt a sense of rejection and betrayal that the deceased didn’t trust her  
27 enough to speak to her about their spiralling debts. She would have “toughed it out and said  
28 to him ok what are we going to do about it” but she feels he was afraid to tell her as “I  
29 suppose he thought I’d leave him”. Three participants were in the process of selling their  
30 properties or had a strong desire to move at the time of the interview as one felt she could  
31 not “move forward while I’m in this house presently” due to her experience of visions of the  
32 deceased in the house.  
33  
34  
35  
36  
37  
38  
39  
40

## 41 **Quantitative results**

### 42 *Characteristics of decedents and family members*

43  
44  
45  
46 Characteristics of the 33 suicide decedents and family members bereaved by suicide are  
47 presented in Table 1. The majority of suicide decedents were male (72.7%), aged 40-59  
48 years (42.4%), were single (42.4%) at the time of death, and died by hanging (57.6%). While,  
49 just over half of the suicide-bereaved family members were female (54.5%) and aged  
50 between 40-59 years (57.6%). The most commonly represented kinship was partner/spouse  
51 (36.4%). The majority of suicide decedents were educated to secondary school level  
52  
53  
54  
55  
56  
57  
58  
59  
60

(39.4%), followed by one quarter (27.3%) and one fifth (21.2%) were educated to post-leaving certificate and third level, respectively. The majority of suicide decedents (42.4%) were employed/self-employed prior to their death. Data for the other educational and employment categories were not presented to maintain confidentiality. Hanging was the most common method of suicide (57.6%), with over half of the sample having a history of intentional self-harm prior to their suicide (54.5%). Just under a half of suicide decedents (45.5%) left a suicide note.

Table 1: Characteristic of suicide decedents and suicide-bereaved family members (n = 33)

|                                               | Suicide decedents N (%) | Family members N (%) |
|-----------------------------------------------|-------------------------|----------------------|
| <b>Sex</b>                                    |                         |                      |
| Male                                          | 24 (72.7)               | 15 (45.5)            |
| Female                                        | 9 (27.3)                | 18 (54.5)            |
| <b>Age</b>                                    |                         |                      |
| 18-39 years                                   | 9 (27.3)                | 7 (21.2)             |
| 40-59 years                                   | 14 (42.2)               | 19 (57.6)            |
| 60+ years                                     | 10 (30.3)               | 7 (21.2)             |
| <b>Interviewee's relationship to deceased</b> |                         |                      |
| Partner/Spouse                                |                         | 12 (36.4)            |
| Parent                                        |                         | 7 (21.2)             |
| Sibling                                       |                         | 9 (27.3)             |
| Child                                         |                         | 5 (15.2)             |
| <b>Marital status</b>                         |                         |                      |
| Single                                        | 14 (42.2)               |                      |
| Married/co-habiting                           | 12 (36.4)               |                      |
| Widowed/divorced/separated                    | 7 (21.2)                |                      |

#### *Wellbeing outcomes (DASS-21 scale)*

Median scores on the DASS-21 were highest for stress (Mdn = 12.00, IQR = 11.00), followed by depression (Mdn = 4.00, IQR = 8.00) and anxiety (Mdn = 2.00, IQR = 5.00). Nearly one-

quarter of the sample (24.2%) had scores that indicated the presence of at least mild levels of depression. One in four suicide-bereaved family members (27.3%) had scores that indicated the presence of at least mild levels of stress. Just under a fifth of participants (18.2%) had scores that indicated the presence of at least mild levels of anxiety (Table 2). These outcomes refer to participants' wellbeing in the week before the interview.

Table 2: Descriptive statistics of DASS-21 scale scores

|                         | Median (IQR)  | Range | Above "normal" cut-off N (%) <sup>1</sup> |
|-------------------------|---------------|-------|-------------------------------------------|
| <b>Depression score</b> | 4.00 (8.00)   | 0-34  | 8 (24.2)                                  |
| <b>Anxiety score</b>    | 2.00 (5.00)   | 0-24  | 6 (18.2)                                  |
| <b>Stress score</b>     | 12.00 (11.00) | 0-28  | 9 (27.3)                                  |
| <b>Total score</b>      | 18.00 (26.00) | 0-76  |                                           |

A Mann-Whitney U test revealed no significant difference in the levels of depression ( $p = .47$ ), anxiety ( $p = .37$ ) and stress ( $p = .81$ ) between suicide-bereaved males and females (Table 3). A Mann-Whitney U test also revealed no significant differences for levels of depression ( $p = .43$ ), anxiety ( $p = .45$ ) and stress ( $p = .61$ ) between those bereaved by hanging and non-hanging suicides (Table 3).

Table 3: DASS-21 median rank scores by gender and method of suicide

|                  | Males         | Females       | p   | Hanging       | Non-hanging <sup>2</sup> | p   |
|------------------|---------------|---------------|-----|---------------|--------------------------|-----|
|                  | N = 15        | N = 18        |     | N = 19        | N = 14                   |     |
| Variable         | Median (IQR)  |               |     |               |                          |     |
| Depression score | 4.00 (10.00)  | 4.00 (7.00)   | .47 | 4.00 (6.00)   | 4.00 (13.00)             | .43 |
| Anxiety score    | 2.00 (2.00)   | 3.00 (14.00)  | .37 | 2.00 (6.00)   | 2.00 (6.00)              | .45 |
| Stress score     | 12.00 (12.00) | 11.00 (11.00) | .81 | 10.00 (10.00) | 13.00 (13.00)            | .61 |
| Total score      | 18.00 (26.00) | 18.00 (32.00) | .93 | 18.00 (14.00) | 19.00 (29.00)            | .74 |

<sup>1</sup> Scores of  $\geq 10$  for depression,  $\geq 8$  for anxiety and  $\geq 15$  for stress

<sup>2</sup> Includes every other method besides hanging

## DISCUSSION

### Principal findings

The qualitative and quantitative aspects of this study provides insight into the unique grief processes and health impacts experienced by family members bereaved by suicide. The qualitative study further addresses a significant gap in the literature by exploring the physical, psychosomatic health experiences and health behaviours of suicide-bereaved family members. Results from the quantitative component of this study indicate that a sizeable minority of suicide-bereaved family members experienced elevated levels of depression, anxiety, and stress. Other empirical studies have found similar rates of depression and anxiety amongst suicide-bereaved people to the current study, with one study finding that 18% of the sample were moderately to severely depressed, as measured on the PHQ-9, while 21% reported anxiety symptoms on the GAD- 2[44]. Furthermore, the prevalence of depression in family members bereaved by suicide was reported in previous studies as 30.5%[11] and 23%[45]. Other studies of nonclinical samples of adults had lower median scores on the DASS-21 scale when compared to the suicide-bereaved median scores found in this study[46 47]. Therefore, this indicates that those bereaved by suicide may have higher rates of depression, anxiety and stress compared to nonclinical adult samples.

One possible explanation for the lower than expected prevalence of depression, anxiety and/or stress in our sample may be selection bias. Those family members who chose to take part in the study may have had lower levels of psychopathology or difficulties with the grieving process than other bereaved family members, and therefore may have been more likely to take part in the study. One recent population-based study compared suicide-bereaved parents with matched non-bereaved parents: 20.5% of suicide-bereaved parents refused to take part or to complete the study on the grounds of distress or ill-health, compared to just 7.6% of non-suicide bereaved parents[44]. This suggests that those who agree to take part in suicide bereavement research may be in better health than those who declined to participate. Consequently, the number of suicide-bereaved people experiencing high levels of depression, anxiety, and/or stress in this study and other empirical research may be an underestimate of the true figure. Findings from the qualitative interviews indicate that the initial feelings experienced by family members bereaved by suicide include disbelief, shock, blame, guilt and anger. These mirror findings from other qualitative studies

1  
2  
3 [30]. Our qualitative and quantitative results indicate that suicide-bereaved family members  
4 experience a number of adverse psychological problems including, depression, anxiety,  
5 panic attacks, suicidal thoughts, intrusive images, nightmares and PTSD. In addition, a  
6 number of participants also experienced adverse psychosomatic health experiences  
7 including feelings of nausea, vomiting, chest pains, palpitations, physical pain, abdominal  
8 pains, and breathlessness. In some cases, these symptoms continued in the months after  
9 the death and were associated with diagnoses such as hypertension, diverticulitis and type 1  
10 diabetes. Bolton and colleagues[11] took a quantitative approach and similarly found that  
11 suicide-bereaved parents had significantly higher rates of cardiovascular disease, chronic  
12 obstructive pulmonary disease, hypertension, diabetes, depression and anxiety disorders  
13 compared accident-bereaved parents. Additionally, a recent systematic review noted that  
14 there is tentative evidence to suggest that suicide-bereaved family members have an  
15 increased risk for a number of adverse physical health outcomes compared to people  
16 bereaved by other causes of death[11 16-18 48]. Therefore, this study corroborates these  
17 previous findings that people bereaved by suicide can experience adverse physical and  
18 psychological health outcomes.  
19  
20  
21  
22  
23  
24  
25  
26  
27  
28  
29  
30

31 The quantitative and particularly the qualitative component of this study illustrate  
32 the difficulties encountered by family members bereaved by suicide and consequently, the  
33 support they require. Research compiled by Grad and colleagues[49] underlies the  
34 importance of those bereaved by suicide having the opportunity to seek support from  
35 outside the family. Some participants spoke of the desire to attend a suicide support group.  
36 However, there is little research on the effectiveness of these groups for those bereaved by  
37 suicide[50]. It was also clear from the interviews that financial difficulties in the aftermath of  
38 the suicide were unfortunately common and prevented many from accessing formal support  
39 services. Participants spoke about having to halt their counselling sessions due to a lack of  
40 money to pay for the service. Reasons for financial difficulties varied and included inheriting  
41 debts accrued by the deceased prior to the death or having to give up or take a break from  
42 work due to grieving difficulties. Another study found that duration of support was  
43 important, with 27% of people believing they required professional help for at least 12  
44 months following the death. Furthermore, 25% and 17.4% reported needing support for at  
45 least two years, or for as long as required[26]. These points underlie the importance of not  
46  
47  
48  
49  
50  
51  
52  
53  
54  
55  
56  
57  
58  
59  
60

1  
2  
3 only providing timely and effective support to people bereaved by suicide but also support  
4 that does not preclude people due to their financial circumstances.  
5  
6

7 The findings from the semi-structured interviews corroborate the quantitative  
8 results of family members' wellbeing, as measured by the DASS-21 scale. The quantitative  
9 scale found that nearly one quarter of family members had scores that indicated at least  
10 mild levels of depression. Furthermore, 1 in four and nearly 1 in five had a least mild levels  
11 of stress and anxiety, respectively. The qualitative interviews provided a greater insight into  
12 these difficulties through participants' descriptions of visions/nightmares, suicidal ideation,  
13 suicide attempts and physician-diagnosed depression, anxiety and PTSD in the months  
14 following the suicide. Additionally, this mixed-methods study identified a gap in the  
15 literature relating to qualitative research specifically exploring the physical and  
16 psychosomatic health experiences in family members bereaved by suicide. Going forward,  
17 further quantitative research investigating the association between suicide bereavement  
18 and objective measures of physical health is required.  
19  
20  
21  
22  
23  
24  
25  
26

27  
28 The mixed-methods approach and the comprehensive recruitment process involved  
29 is a key strength of this study. Consecutive suicide and open verdict cases were identified via  
30 examining coroner's records as part of a larger case-control study (SSIS-ACE). Basic  
31 information about the case and next-of-kin information was collected. Family members  
32 were initially contacted via letter and telephone to take part in a psychological autopsy  
33 study. Data on family members' wellbeing was collected at the end of the psychological  
34 autopsy interview. This data was analysed and forms the quantitative component of this  
35 mixed-methods study. Following their participation in the larger case-control study, those  
36 who provided written consent for follow-up were contacted by the first author of this paper  
37 to take part in an additional qualitative interview about their experiences following the  
38 suicide. Recruitment of the family members via coroner's records and the consecutive  
39 nature of the suicide and open verdict cases reduces the likelihood of selection bias, which  
40 is often a significant problem in research addressing vulnerable populations[51]. The  
41 combination of quantitative and qualitative research provides a clear indication of the  
42 challenges and health problems encountered by family members bereaved by suicide.  
43  
44  
45  
46  
47  
48  
49  
50  
51  
52  
53

#### 54 **Strengths and limitations**

55  
56  
57

1  
2  
3 This is the first mixed-methods study to specifically examine and explore the physical and  
4 psychological health implications of suicide bereavement from both a quantitative and a  
5 qualitative perspective. The quantitative data for this study was derived from the larger  
6 SSIS-ACE case-control study which included consecutive cases of suicide and open verdict  
7 cases that met the Rosenberg criteria for the determination of suicide [34]. The validity of  
8 this research can be considered good as this research covered both confirmed suicide  
9 deaths and open verdicts deaths as these may in fact be hidden suicide cases[52-54].  
10 Furthermore, researchers have recommended that such cases meeting criteria for a  
11 probable suicide should be included in future research studies[53]. While the numbers of  
12 suicide-bereaved family members in the study is modest, the quantitative results are similar  
13 to those obtained in larger studies, as previously stated[11 45]. The interviewer for the  
14 qualitative component of the study (AS) did not conduct any of the interviews for the SSIS-  
15 ACE study, which minimises the risk of interviewer bias in the mixed-methods study. This  
16 study has two main limitations. Firstly, family members' physical health experiences were  
17 self-reported and therefore do not constitute an objective measure. An objective measure  
18 of physical health would remove any potential for recall bias in participants' responses.  
19 However, the focus of the qualitative component of the study is to understand family  
20 member's experience of their own health, rather than objective health status. Secondly, the  
21 relatively small quantitative sample size did not allow for more sophisticated statistical  
22 analyses, including controlling for potential confounding factors such as closeness to the  
23 deceased, kinship and time since death which may have impacted on the results presented.  
24 Further mixed-methods research examining an objective measure of physical health would  
25 be a significant addition to the knowledge base.  
26  
27  
28  
29  
30  
31  
32  
33  
34  
35  
36  
37  
38  
39  
40  
41  
42

### 43 **Implications**

44  
45 Considering previous research in the area, this study adds to the existing knowledge-base in  
46 a number of ways. While the mental health outcomes of suicide bereavement have been  
47 well-researched, there has been a dearth of research specifically examining the physical and  
48 psychosomatic health outcomes of suicide bereavement from an experiential perspective.  
49 Several implications arise from this research for professionals seeking to support people  
50 bereaved by suicide. First, equal attention needs to be given to the physical and emotional  
51 sequelae following suicide bereavement by clinicians. This research suggests that one in  
52  
53  
54  
55  
56  
57



1  
2  
3 four people bereaved by suicide will suffer elevated levels of depression and stress and just  
4 under one in five will have elevated levels of anxiety. Second, it was clear that, due to  
5 mental and physical health difficulties, some people were not able to effectively identify or  
6 seek support. This underlies the importance of health professionals, coroners and any other  
7 professional to pro-actively facilitate support for those bereaved by suicide. This  
8 professional support is especially important when strained or fractured familial relations  
9 affect the quality of the bereaved person's informal support network.  
10  
11  
12  
13  
14  
15  
16  
17  
18  
19

### 20 **Author affiliations**

21  
22 <sup>1</sup>School of Public Health, University College Cork, Cork, Ireland

23  
24 <sup>2</sup>National Suicide Research Foundation, University College Cork, Cork, Ireland

25  
26  
27 <sup>3</sup>Department of Emergency Medicine, University of Massachusetts Medical School,  
28 Worcester, MA, USA

29  
30  
31 <sup>4</sup> Department of Obstetrics and Gynaecology, University College Cork, Cork, Ireland

### 32 **Acknowledgements**

33  
34  
35 The authors would like to thank all of those who took the time to take part in the interviews.  
36  
37 The authors would also like to acknowledge Dr Christina Dillon for her guidance with respect  
38 to the quantitative data analysis.  
39  
40

### 41 **Author's contribution**

42  
43 AS drafted the initial protocol document. AS, CL, EA and PC contributed to the design of the  
44 study. KMS, CL, PC and EA contributed to planned analyses. KMS, CL, EA and PC contributed  
45 to revising drafts. All authors contributed to the final manuscript.  
46  
47

### 48 **Funding statement**

49  
50 This work was conducted as part of the SPHeRE Programme under Grant No.  
51 SPHeRE/2013/1. I would also like to acknowledge the funding received from the Health  
52 Research Board to conduct the original SSIS-ACE case-control study, Grant No. HRA-2013-  
53  
54  
55  
56  
57

1  
2  
3 PHR-438 and the National Office for Suicide Prevention for providing funding for the  
4 supervision of this research.  
5

### 6 7 **Competing interests**

8  
9 None

### 10 11 **Exclusive licence statement**

12 The Corresponding Author has the right to grant on behalf of all authors and does grant on  
13 behalf of all authors, a worldwide licence to the Publishers and its licensees in perpetuity, in  
14 all forms, formats and media (whether known now or created in the future), to i) publish,  
15 reproduce, distribute, display and store the Contribution, ii) translate the Contribution into  
16 other languages, create adaptations, reprints, include within collections and create  
17 summaries, extracts and/or, abstracts of the Contribution, iii) create any other derivative  
18 work(s) based on the Contribution, iv) to exploit all subsidiary rights in the Contribution, v)  
19 the inclusion of electronic links from the Contribution to third party material where-ever it  
20 may be located; and, vi) licence any third party to do any or all of the above.  
21  
22  
23  
24  
25  
26  
27

### 28 29 **Ethical approval**

30  
31 Ethical approval has been granted from the Clinical Research Ethics Committee of University  
32 College Cork, reference number: ECM 4 (o) 19/01/2016. Ethical approval was also granted  
33 from the Clinical Research Ethics Committee of University College Cork, for the SSIS-ACE  
34 study, reference number: ECM 5(5) 01/04/2014.  
35  
36  
37

### 38 39 **Data sharing statement**

40  
41 The data recorded, transcribed and analysed is very sensitive in nature. Due to the relatively  
42 small number of participants and the specific geographic location, it would not be  
43 appropriate to consider data sharing due to the risk of people being potentially identified.  
44  
45  
46

### 47 48 **References**

- 49  
50  
51  
52  
53  
54  
55  
56  
57  
58  
59  
60
1. World Health Organisation. Preventing Suicide: A Global Imperative. Luxembourg, 2014:89.
  2. Berman AL. Estimating the Population of Survivors of Suicide: Seeking an Evidence Base. *Suicide Life Threat. Behav.* 2011;**41**(1):110-16 doi: 10.1111/j.1943-278X.2010.00009.x[published Online First: Epub Date]].
  3. Andriessen K, Rahman B, Draper B, Dudley M, Mitchell PB. Prevalence of exposure to suicide: A meta-analysis of population-based studies. *J. Psychiatr. Res.* 2017;**88**:113-20 doi: <http://dx.doi.org/10.1016/j.jpsychires.2017.01.017>[published Online First: Epub Date]].

- 1
- 2
- 3
- 4 4. Pitman A, Osborn D, King M, Erlangsen A. Effects of suicide bereavement on mental health and  
5 suicide risk. *The Lancet Psychiatry* 2014;**1**(1):86-94 doi: 10.1016/s2215-0366(14)70224-  
6 x[published Online First: Epub Date]].
- 7 5. Rostila M, Saarela J, Kawachi I. Suicide following the death of a sibling: a nationwide follow-up  
8 study from Sweden. *BMJ Open* 2013;**3**(4) doi: 10.1136/bmjopen-2013-002618[published  
9 Online First: Epub Date]].
- 10 6. Pitman AL, Osborn DPJ, Rantell K, King MB. Bereavement by suicide as a risk factor for suicide  
11 attempt: a cross-sectional national UK-wide study of 3432 young bereaved adults. *BMJ Open*  
12 2016;**6**(1) doi: 10.1136/bmjopen-2015-009948[published Online First: Epub Date]].
- 13 7. Wilcox HC, Kuramoto SJ, Lichtenstein P, Långström N, Brent DA, Runeson B. Psychiatric morbidity,  
14 violent crime, and suicide among children and adolescents exposed to parental death. *J. Am.  
15 Acad. Child Adolesc. Psychiatry* 2010;**49**(5):514-23
- 16 8. Mittendorfer-Rutz E, Rasmussen F, Lange T. A life-course study on effects of parental markers of  
17 morbidity and mortality on offspring's suicide attempt. *PLoS One* 2012;**7**(12):e51585 doi:  
18 10.1371/journal.pone.0051585[published Online First: Epub Date]].
- 19 9. Mittendorfer-Rutz E, Rasmussen F, Wasserman D. Familial clustering of suicidal behaviour and  
20 psychopathology in young suicide attempters. *Soc. Psychiatry Psychiatr. Epidemiol.*  
21 2008;**43**(1):28-36 doi: 10.1007/s00127-007-0266-0[published Online First: Epub Date]].
- 22 10. Brent D, Melhem N, Donohoe MB, Walker M. The incidence and course of depression in  
23 bereaved youth 21 months after the loss of a parent to suicide, accident, or sudden natural  
24 death. *Am. J. Psychiatry* 2009;**166**(7):786-94 doi: 10.1176/appi.ajp.2009.08081244[published  
25 Online First: Epub Date]].
- 26 11. Bolton JM, Au W, Leslie WD, et al. Parents bereaved by offspring suicide: a population-based  
27 longitudinal case-control study. *JAMA Psychiatry* 2013;**70**(2):158-67 doi:  
28 10.1001/jamapsychiatry.2013.275[published Online First: Epub Date]].
- 29 12. Ellenbogen S, Gratton F. Do They Suffer More? Reflections on Research Comparing Suicide  
30 Survivors to Other Survivors. *Suicide Life Threat. Behav.* 2001;**31**(1):83-90 doi:  
31 10.1521/suli.31.1.83.21315[published Online First: Epub Date]].
- 32 13. Pitman AL, Osborn DP, Rantell K, King MB. The stigma perceived by people bereaved by suicide  
33 and other sudden deaths: A cross-sectional UK study of 3432 bereaved adults. *J. Psychosom.*  
34 *Res.* 2016;**87**:22-9 doi: 10.1016/j.jpsychores.2016.05.009[published Online First: Epub  
35 Date]].
- 36 14. Xu G, Li N. A comparison study on mental health status between suicide survivors and survivors  
37 of accidental deaths in rural China. *J. Psychiatr. Ment. Health Nurs.* 2014;**21**(10):859-65
- 38 15. Erlangsen A, Runeson B, Bolton JM, et al. Association between spousal suicide and mental,  
39 physical, and social health outcomes: A longitudinal and nationwide register-based study.  
40 *JAMA Psychiatry* 2017 doi: 10.1001/jamapsychiatry.2017.0226[published Online First: Epub  
41 Date]].
- 42 16. Miyabayashi S, Yasuda J. Effects of loss from suicide, accidents, acute illness and chronic illness  
43 on bereaved spouses and parents in Japan: Their general health, depressive mood, and grief  
44 reaction. *Psychiatry Clin. Neurosci.* 2007;**61**(5):502-08
- 45 17. de Groot MH, de Keijser J, Neeleman J. Grief Shortly After Suicide And Natural Death: A  
46 Comparative Study Among Spouses and First-Degree Relatives. *Suicide Life Threat. Behav.*  
47 2006;**36**(4):418-31 doi: 10.1521/suli.2006.36.4.418[published Online First: Epub Date]].
- 48 18. Séguin M, Lesage A, Kiely MC. Parental Bereavement After Suicide and Accident: A Comparative  
49 Study. *Suicide Life Threat. Behav.* 1995;**25**(4):489-98 doi: 10.1111/j.1943-  
50 278X.1995.tb00241.x[published Online First: Epub Date]].
- 51 19. Pitman AL, Hunt IM, McDonnell SJ, Appleby L, Kapur N. Support for Relatives Bereaved by  
52 Psychiatric Patient Suicide: National Confidential Inquiry Into Suicide and Homicide Findings.  
53 *Psychiatr. Serv.* 2016;appi.ps.201600004 doi: 10.1176/appi.ps.201600004[published Online  
54 First: Epub Date]].
- 55
- 56
- 57
- 58
- 59
- 60

- 1  
2  
3 20. Pitman AL, Rantell K, Moran P, et al. Support received after bereavement by suicide and other  
4 sudden deaths: a cross-sectional UK study of 3432 young bereaved adults. *BMJ Open*  
5 2017;**7**(5) doi: 10.1136/bmjopen-2016-014487[published Online First: Epub Date]].
- 6 21. Pettersen R, Omerov P, Steineck G, et al. Suicide-Bereaved Siblings' Perception of Health  
7 Services. *Death Stud.* 2015;**39**(6):323-31 9p doi: 10.1080/07481187.2014.946624[published  
8 Online First: Epub Date]].
- 9 22. McMenamy JM, Jordan JR, Mitchell AM. What do Suicide Survivors Tell Us They Need? Results of  
10 a Pilot Study. *Suicide Life Threat. Behav.* 2008;**38**(4):375-89 doi:  
11 10.1521/suli.2008.38.4.375[published Online First: Epub Date]].
- 12 23. Dyregrov K. What do we know about needs for help after suicide in different parts of the world?  
13 A phenomenological perspective. *Crisis* 2011;**32**(6):310-8 doi: 10.1027/0227-  
14 5910/a000098[published Online First: Epub Date]].
- 15 24. Dyregrov K. Assistance from local authorities versus survivors' needs for support after suicide  
16 *Death Stud.* 2002;**26**(8):647-68 doi: 10.1080/07481180290088356[published Online First:  
17 Epub Date]].
- 18 25. Brown J, Evans-Lacko S, Aschan L, Henderson MJ, Hatch SL, Hotopf M. Seeking informal and  
19 formal help for mental health problems in the community: a secondary analysis from a  
20 psychiatric morbidity survey in South London. *BMC Psychiatry* 2014;**14**(1):275 doi:  
21 10.1186/s12888-014-0275-y[published Online First: Epub Date]].
- 22 26. Wilson A, Marshall A. The support needs and experiences of suicidally bereaved family and  
23 friends. *Death Stud.* 2010;**34**(7):625-40
- 24 27. Sugrue JL, McGilloway S, Keegan O. The Experiences of Mothers Bereaved by Suicide: An  
25 Exploratory Study. *Death Stud.* 2013;**38**(2):118-24 doi:  
26 10.1080/07481187.2012.738765[published Online First: Epub Date]].
- 27 28. McKinnon JM, Chonody J. Exploring the Formal Supports Used by People Bereaved Through  
28 Suicide: A Qualitative Study. *Social Work in Mental Health* 2014;**12**(3):231-48 doi:  
29 10.1080/15332985.2014.889637[published Online First: Epub Date]].
- 30 29. Hjelmeland H, Knizek BL. Why we need qualitative research in suicidology. *Suicide Life Threat.*  
31 *Behav.* 2010;**40**(1):74-80 doi: 10.1521/suli.2010.40.1.74[published Online First: Epub Date]].
- 32 30. Shields C, Kavanagh M, Russo K. A Qualitative Systematic Review of the Bereavement Process  
33 Following Suicide. *Omega: Journal of Death & Dying* 2017;**74**(4):426-54 doi:  
34 10.1177/0030222815612281[published Online First: Epub Date]].
- 35 31. Rogers J, Apel S. Revitalizing suicidology: A call for mixed methods designs. *Suicidology Online*  
36 2010;**1**:95-98
- 37 32. Creswell JW. *A Concise Introduction to Mixed Methods Research*. Los Angeles: SAGE Publications,  
38 2015.
- 39 33. Spillane A, Larkin C, Corcoran P, Matvienko-Sikar K, Arensman E. What are the physical and  
40 psychological health effects of suicide bereavement on family members? Protocol for an  
41 observational and interview mixed-methods study in Ireland. *BMJ Open* 2017;**7**(3):e014707  
42 doi: 10.1136/bmjopen-2016-014707[published Online First: Epub Date]].
- 43 34. Rosenberg ML, Davidson LE, Smith JC, et al. Operational criteria for the determination of suicide.  
44 *J. Forensic Sci.* 1988;**33**(6):1445-56
- 45 35. Isometsä ET. Psychological autopsy studies – a review. *Eur. Psychiatry* 2001;**16**(7):379-85 doi:  
46 [http://dx.doi.org/10.1016/S0924-9338\(01\)00594-6](http://dx.doi.org/10.1016/S0924-9338(01)00594-6)[published Online First: Epub Date]].
- 47 36. Conner KR, Beautrais AL, Brent DA, Conwell Y, Phillips MR, Schneider B. The next generation of  
48 psychological autopsy studies. Part I. Interview content. *Suicide Life Threat. Behav.*  
49 2011;**41**(6):594-613 doi: 10.1111/j.1943-278X.2011.00057.x[published Online First: Epub  
50 Date]].
- 51 37. Freuchen A, Kjelsberg E, Grøholt B. Suicide or accident? A psychological autopsy study of suicide  
52 in youths under the age of 16 compared to deaths labeled as accidents. *Child and adolescent*  
53  
54  
55  
56  
57  
58  
59  
60

- 1  
2  
3 psychiatry and mental health 2012;**6**:30-30 doi: 10.1186/1753-2000-6-30[published Online  
4 First: Epub Date]].
- 5 38. Wong PWC, Chan WSC, Chen EYH, Chan SSM, Law YW, Yip PSF. Suicide among adults aged 30–  
6 49: A psychological autopsy study in Hong Kong. *BMC Public Health* 2008;**8**:147-47 doi:  
7 10.1186/1471-2458-8-147[published Online First: Epub Date]].
- 8 39. Lovibond PF, Lovibond SH. The structure of negative emotional states: comparison of the  
9 Depression Anxiety Stress Scales (DASS) with the Beck Depression and Anxiety Inventories.  
10 *Behav. Res. Ther.* 1995;**33**(3):335-43
- 11 40. Lovibond SH, Lovibond PF. *Manual for the Depression Anxiety & Stress Scales*. 2nd Edition ed.  
12 Sydney Psychology Foundation 1995.
- 13 41. Cheung T, Wong SY, Wong KY, et al. Depression, Anxiety and Symptoms of Stress among  
14 Baccalaureate Nursing Students in Hong Kong: A Cross-Sectional Study. *Int. J. Environ. Res.*  
15 *Public Health* 2016;**13**(8) doi: 10.3390/ijerph13080779[published Online First: Epub Date]].
- 16 42. Parkitny L, McAuley J. The Depression Anxiety Stress Scale (DASS). *J. Physiother.* 2010;**56**(3):204  
17 doi: 10.1016/S1836-9553(10)70030-8[published Online First: Epub Date]].
- 18 43. Braun V, Clarke V. Using thematic analysis in psychology. *Qualitative Research in Psychology*  
19 2006;**3**(2):77-101 doi: 10.1191/1478088706qp0630a[published Online First: Epub Date]].
- 20 44. Omerov P, Steineck G, Dyregrov K, Runeson B, Nyberg U. The ethics of doing nothing. Suicide-  
21 bereavement and research: ethical and methodological considerations. *Psychol. Med.*  
22 2014;**44**(16):3409-20
- 23 45. Melhem NM, Walker M, Moritz G, Brent DA. Antecedents and sequelae of sudden parental death  
24 in offspring and surviving caregivers. *Arch. Pediatr. Adolesc. Med.* 2008;**162**(5):403-10 doi:  
25 10.1001/archpedi.162.5.403[published Online First: Epub Date]].
- 26 46. Sinclair SJ, Siefert CJ, Slavin-Mulford JM, Stein MB, Renna M, Blais MA. Psychometric evaluation  
27 and normative data for the depression, anxiety, and stress scales-21 (DASS-21) in a  
28 nonclinical sample of U.S. adults. *Eval. Health Prof.* 2012;**35**(3):259-79 doi:  
29 10.1177/0163278711424282[published Online First: Epub Date]].
- 30 47. Henry JD, Crawford JR. The short-form version of the Depression Anxiety Stress Scales (DASS-21):  
31 Construct validity and normative data in a large non-clinical sample. *Br. J. Clin. Psychol.*  
32 2005;**44**(2):227-39 doi: 10.1348/014466505X29657[published Online First: Epub Date]].
- 33 48. Dyregrov K, Nordanger D, Dyregrov A. Predictors of psychosocial distress after suicide, SIDS and  
34 accidents. *Death Stud.* 2003;**27**(2):143-65 doi: 10.1080/07481180302892[published Online  
35 First: Epub Date]].
- 36 49. Grad OT, Clark S, Dyregrov K, Andriessen K. What helps and what hinders the process of surviving  
37 the suicide of somebody close? *Crisis* 2004;**25**(3):134-9 doi: 10.1027/0227-  
38 5910.25.3.134[published Online First: Epub Date]].
- 39 50. Andriessen K, Krysinska K. Essential questions on suicide bereavement and postvention.  
40 *International Journal of Environmental Research & Public Health* [Electronic Resource]  
41 2012;**9**(1):24-32
- 42 51. Maple M, Cerel J, Jordan JR, McKay K. Uncovering and Identifying the Missing Voices in Suicide  
43 Bereavement. *Suicidology Online* 2014;**5**:1-12
- 44 52. Pritchard C, Hansen L. Examining undetermined and accidental deaths as source of 'under-  
45 reported-suicide' by age and sex in twenty Western countries. *Community Ment. Health J.*  
46 2015;**51**(3):365-76 doi: 10.1007/s10597-014-9810-z[published Online First: Epub Date]].
- 47 53. Bakst SS, Braun T, Zucker I, Amitai Z, Shohat T. The accuracy of suicide statistics: are true suicide  
48 deaths misclassified? *Soc. Psychiatry Psychiatr. Epidemiol.* 2016;**51**(1):115-23 doi:  
49 10.1007/s00127-015-1119-x[published Online First: Epub Date]].
- 50 54. Chang SS, Sterne JA, Lu TH, Gunnell D. 'Hidden' suicides amongst deaths certified as  
51 undetermined intent, accident by pesticide poisoning and accident by suffocation in Taiwan.  
52 *Soc. Psychiatry Psychiatr. Epidemiol.* 2010;**45**(2):143-52 doi: 10.1007/s00127-009-0049-  
53 x[published Online First: Epub Date]].
- 54  
55  
56  
57  
58  
59  
60

1  
2  
3  
4  
5  
6  
7  
8  
9  
10  
11  
12  
13  
14  
15  
16  
17  
18  
19  
20  
21  
22  
23  
24  
25  
26  
27  
28  
29  
30  
31  
32  
33  
34  
35  
36  
37  
38  
39  
40  
41  
42  
43  
44  
45  
46  
47  
48  
49  
50  
51  
52  
53  
54  
55  
56  
57  
58  
59  
60

For peer review only

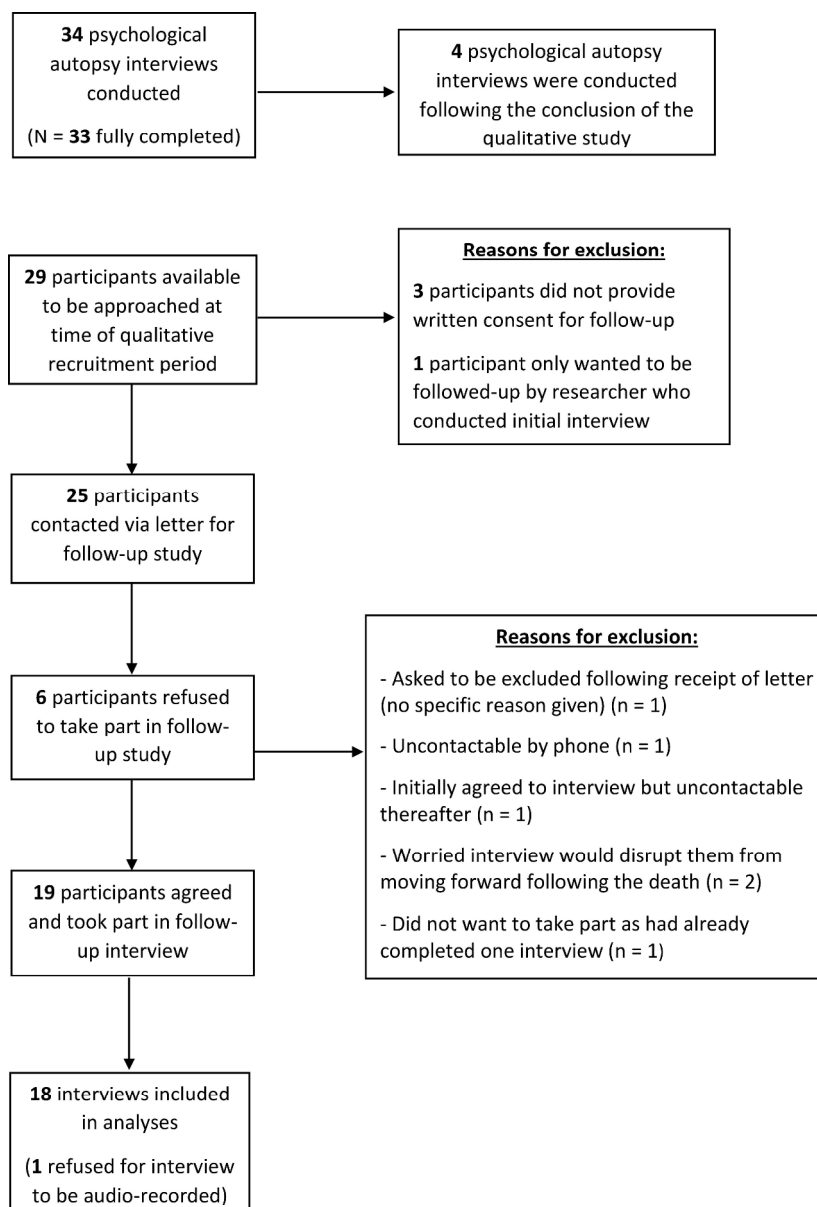

45 **Figure 1:** Flowchart of recruitment process for SSIS-ACE study

46 232x339mm (300 x 300 DPI)



## Consolidated criteria for reporting qualitative studies (COREQ): 32-item checklist

Developed from:

Tong A, Sainsbury P, Craig J. Consolidated criteria for reporting qualitative research (COREQ): a 32-item checklist for interviews and focus groups. *International Journal for Quality in Health Care*. 2007. Volume 19, Number 6: pp. 349 – 357

**YOU MUST PROVIDE A RESPONSE FOR ALL ITEMS. ENTER N/A IF NOT APPLICABLE**

| No. Item                                       | Guide questions/description                                                                                                                              | Reported on Page # |
|------------------------------------------------|----------------------------------------------------------------------------------------------------------------------------------------------------------|--------------------|
| <b>Domain 1: Research team and reflexivity</b> |                                                                                                                                                          |                    |
| <i>Personal Characteristics</i>                |                                                                                                                                                          |                    |
| 1. Interviewer/facilitator                     | Which author/s conducted the interview or focus group?                                                                                                   | 6 (in protocol)    |
| 2. Credentials                                 | What were the researcher's credentials?<br>E.g. PhD, MD                                                                                                  | 6 (in protocol)    |
| 3. Occupation                                  | What was their occupation at the time of the study?                                                                                                      | 6 (in protocol)    |
| 4. Gender                                      | Was the researcher male or female?                                                                                                                       | 6 (in protocol)    |
| 5. Experience and training                     | What experience or training did the researcher have?                                                                                                     | 6 (in protocol)    |
| <i>Relationship with participants</i>          |                                                                                                                                                          |                    |
| 6. Relationship established                    | Was a relationship established prior to study commencement?                                                                                              | 3 (in protocol)    |
| 7. Participant knowledge of the interviewer    | What did the participants know about the researcher? e.g. personal goals, reasons for doing the research                                                 | 4 (in protocol)    |
| 8. Interviewer characteristics                 | What characteristics were reported about the interviewer/facilitator? e.g. Bias, assumptions, reasons and interests in the research topic                | 6 (in protocol)    |
| <b>Domain 2: study design</b>                  |                                                                                                                                                          |                    |
| <i>Theoretical framework</i>                   |                                                                                                                                                          |                    |
| 9. Methodological orientation and Theory       | What methodological orientation was stated to underpin the study? e.g. grounded theory, discourse analysis, ethnography, phenomenology, content analysis | 3 (in protocol)    |
| <i>Participant selection</i>                   |                                                                                                                                                          |                    |
| 10. Sampling                                   | How were participants selected? e.g. purposive, convenience, consecutive, snowball                                                                       | 5-6                |
| 11. Method of approach                         | How were participants approached? e.g. face-to-face, telephone, mail, email                                                                              | 5                  |
| 12. Sample size                                | How many participants were in the study?                                                                                                                 | 5-6, 9             |



|                                        |                                                                                                                                 |                      |
|----------------------------------------|---------------------------------------------------------------------------------------------------------------------------------|----------------------|
| 13. Non-participation                  | How many people refused to participate or dropped out? Reasons?                                                                 | 7                    |
| <i>Setting</i>                         |                                                                                                                                 |                      |
| 14. Setting of data collection         | Where was the data collected? e.g. home, clinic, workplace                                                                      | 8                    |
| 15. Presence of non-participants       | Was anyone else present besides the participants and researchers?                                                               | 3 (in protocol)      |
| 16. Description of sample              | What are the important characteristics of the sample? e.g. demographic data, date                                               | 9                    |
| <i>Data collection</i>                 |                                                                                                                                 |                      |
| 17. Interview guide                    | Were questions, prompts, guides provided by the authors? Was it pilot tested?                                                   | 5 (in protocol)      |
| 18. Repeat interviews                  | Were repeat inter views carried out? If yes, how many?                                                                          | 5                    |
| 19. Audio/visual recording             | Did the research use audio or visual recording to collect the data?                                                             | 5                    |
| 20. Field notes                        | Were field notes made during and/or after the inter view or focus group?                                                        | 4                    |
| 21. Duration                           | What was the duration of the inter views or focus group?                                                                        | 8                    |
| 22. Data saturation                    | Was data saturation discussed?                                                                                                  | 4                    |
| 23. Transcripts returned               | Were transcripts returned to participants for comment and/or correction?                                                        | 6 (in protocol)      |
| <b>Domain 3: analysis and findings</b> |                                                                                                                                 |                      |
| <i>Data analysis</i>                   |                                                                                                                                 |                      |
| 24. Number of data coders              | How many data coders coded the data?                                                                                            | 9                    |
| 25. Description of the coding tree     | Did authors provide a description of the coding tree?                                                                           | 9                    |
| 26. Derivation of themes               | Were themes identified in advance or derived from the data?                                                                     | 5-6 (in protocol), 9 |
| 27. Software                           | What software, if applicable, was used to manage the data?                                                                      | 9                    |
| 28. Participant checking               | Did participants provide feedback on the findings?                                                                              | 6 (in protocol)      |
| <i>Reporting</i>                       |                                                                                                                                 |                      |
| 29. Quotations presented               | Were participant quotations presented to illustrate the themes/findings? Was each quotation identified? e.g. participant number | 10-18                |
| 30. Data and findings consistent       | Was there consistency between the data presented and the findings?                                                              | 20-21                |
| 31. Clarity of major themes            | Were major themes clearly presented in the findings?                                                                            | 10-18                |
| 32. Clarity of minor themes            | Is there a description of diverse cases or discussion of minor themes?                                                          | 10-18                |

**Once you have completed this checklist, please save a copy and upload it as part of your submission. When requested to do so as part of the upload process, please select the file type: *Checklist*. You will NOT be able to proceed with**

1  
2  
3  
4  
5  
6  
7  
8  
9  
10  
11  
12  
13  
14  
15  
16  
17  
18  
19  
20  
21  
22  
23  
24  
25  
26  
27  
28  
29  
30  
31  
32  
33  
34  
35  
36  
37  
38  
39  
40  
41  
42  
43  
44  
45  
46  
47  
48  
49  
50  
51  
52  
53  
54  
55  
56  
57  
58  
59  
60

**submission unless the checklist has been uploaded. Please DO NOT include this checklist as part of the main manuscript document. It must be uploaded as a separate file.**

For peer review only

# BMJ Open

## What are the physical and psychological health effects of suicide bereavement on family members? An observational and interview mixed-methods study in Ireland

|                                 |                                                                                                                                                                                                                                                                                                                                                                                                                                                                                                                                                                                                                               |
|---------------------------------|-------------------------------------------------------------------------------------------------------------------------------------------------------------------------------------------------------------------------------------------------------------------------------------------------------------------------------------------------------------------------------------------------------------------------------------------------------------------------------------------------------------------------------------------------------------------------------------------------------------------------------|
| Journal:                        | <i>BMJ Open</i>                                                                                                                                                                                                                                                                                                                                                                                                                                                                                                                                                                                                               |
| Manuscript ID                   | bmjopen-2017-019472.R2                                                                                                                                                                                                                                                                                                                                                                                                                                                                                                                                                                                                        |
| Article Type:                   | Research                                                                                                                                                                                                                                                                                                                                                                                                                                                                                                                                                                                                                      |
| Date Submitted by the Author:   | 05-Dec-2017                                                                                                                                                                                                                                                                                                                                                                                                                                                                                                                                                                                                                   |
| Complete List of Authors:       | Spillane, Ailbhe; University College Cork National University of Ireland, School of Public Health; National Suicide Research Foundation<br>Matvienko-Sikar, Karen; University College Cork National University of Ireland, School of Public Health<br>Larkin, Celine; University of Massachusetts Medical School Department of Medicine, Department of Emergency Medicine<br>Corcoran, Paul; University College Cork, School of Public Health; National Suicide Research Foundation<br>Arensman, Ella ; University College Cork National University of Ireland, School of Public Health; National Suicide Research Foundation |
| <b>Primary Subject Heading</b>: | Mental health                                                                                                                                                                                                                                                                                                                                                                                                                                                                                                                                                                                                                 |
| Secondary Subject Heading:      | Public health, Qualitative research, Health services research                                                                                                                                                                                                                                                                                                                                                                                                                                                                                                                                                                 |
| Keywords:                       | Mixed-methods, Suicide bereavement, Family members, Morbidity, Health                                                                                                                                                                                                                                                                                                                                                                                                                                                                                                                                                         |
|                                 |                                                                                                                                                                                                                                                                                                                                                                                                                                                                                                                                                                                                                               |

SCHOLARONE™  
Manuscripts

1  
2  
3 **What are the physical and psychological health effects of suicide bereavement on family**  
4 **members? An observational and interview mixed-methods study in Ireland**  
5  
6  
7

8  
9 Ailbhe Spillane<sup>1,2\*</sup>, Karen Matvienko-Sikar<sup>1</sup>, Celine Larkin<sup>3</sup>, Paul Corcoran<sup>1, 2</sup>, Ella Arensman<sup>1,2</sup>  
10  
11  
12

13  
14 \*Corresponding author: Ms Ailbhe Spillane ([ailbhe.spillane@ucc.ie](mailto:ailbhe.spillane@ucc.ie); 00353 21 4205544)  
15  
16

- 17  
18 1. School of Public Health, 4<sup>th</sup> Floor Western Gateway Building, Western Road, Cork,  
19 Ireland  
20  
21  
22 2. National Suicide Research Foundation, Room 4.28, Western Gateway Building,  
23 Western Road, Cork, Ireland  
24  
25  
26  
27 3. Department of Emergency Medicine, University of Massachusetts Medical School,  
28 Worcester, MA, USA  
29  
30  
31  
32  
33

34 **Keywords:** mixed-methods, suicide bereavement, family members, morbidity, health  
35  
36

37 **Word count:** 6,929  
38  
39  
40  
41  
42  
43  
44  
45  
46  
47  
48  
49  
50  
51  
52  
53  
54  
55  
56  
57  
58  
59  
60

## ABSTRACT

**Objectives:** Research focussing on the impact of suicide bereavement on family members' physical and psychological health is scarce. The aim of this study was to examine how family members have been physically and psychologically affected following suicide bereavement. A secondary objective of the study was to describe the needs of family members bereaved by suicide.

**Design:** A mixed-methods study was conducted, using qualitative semi-structured interviews and additional quantitative self-report measures of depression, anxiety and stress (DASS-21).

**Setting:** Consecutive suicide cases and next-of-kin were identified by examining coroner's records in Cork City and County, Ireland from October 2014 to May 2016.

**Participants:** Eighteen family members bereaved by suicide took part in a qualitative interview. They were recruited from the Suicide Support and Information System: A Case-Control Study (SSIS-ACE) where family members bereaved by suicide (n = 33) completed structured measures of their wellbeing.

**Results:** Qualitative findings indicated three superordinate themes in relation to experiences following suicide bereavement: (1) Co-occurrence of grief and health reactions; (2) disparity in supports after suicide; and (3) reconstructing life after deceased's suicide. Initial feelings of guilt, blame, shame and anger often manifested in enduring physical, psychological and psychosomatic difficulties. Support needs were diverse and were often related to the availability or absence of informal support by family or friends. Quantitative results indicated that the proportion of respondents above the DASS-21 cut-offs respectively were 24% for depression, 18% for anxiety and 27% for stress.

**Conclusions:** Healthcare professionals' awareness of the adverse physical and psychosomatic health difficulties experienced by family members bereaved by suicide is essential. Pro-actively facilitating support for this group could help to reduce the negative health sequelae. The effects of suicide bereavement are wide-ranging, including high levels of stress, depression, anxiety, and physical health difficulties.

### Strengths and limitations of the study

- This study addressed a specific knowledge gap by examining the physical and psychological health effects of suicide bereavement on family members in Ireland
- The study covered consecutive cases of suicide, which increases the external validity of the outcomes
- This study screened open verdict deaths with validated screening criteria to identify probable suicides. Therefore, this study benefits from the inclusion of probable suicide cases that would otherwise have not been included in the study
- Physical health issues were self-reported and were not objectively measured

### INTRODUCTION

Suicide is a significant global concern, with approximately 800,000 people taking their own lives every year[1]. For every death by suicide, an estimated 60 people are directly and intimately affected[2]. Recent research also indicates that 1 in 20 people have been exposed to suicide in the past year, and 1 in 5 people have been exposed to suicide during their lifetime[3]. Suicide bereavement is associated with a host of adverse mental health outcomes of suicide bereavement, including heightened risk of suicide[4-6], attempted suicide[6-9], depression[10 11], psychiatric morbidity[7] and psychiatric admission[11]. There is also emerging evidence from quantitative studies that family members bereaved by suicide experienced more physical health issues than those bereaved by other means[12].

Individuals bereaved by suicide had poorer general health[13 14], reported more pain[14], reported more physical illnesses[15] and disorders including cardiovascular disease, chronic obstructive pulmonary disease, hypertension and diabetes[11]. In addition, suicide-bereaved family members visited a GP more often[15] and had significantly higher rates of outpatient physician visits for physical illnesses[11] than non-suicide bereaved individuals. Negative health outcomes provide an impetus for timely access to effective health services and psychosocial supports for those bereaved by suicide, many of whom may carry existing health adversities prior to the death[11].

Previous research has underlined the broader importance of access to support for those bereaved by suicide [16 17]. In the aftermath of suicide, feelings of depression,

1  
2  
3 anxiety, guilt, extreme sadness, anger and nightmares are often present and are associated  
4 with help-seeking in people bereaved by suicide[18 19]. These acute effects can be long-  
5 lasting: the time point rated as the worst stage after a death is the first week for about one-  
6 quarter of suicide-bereaved individuals but many family members struggle with the loss for  
7 the first year and, in one-fifth of cases, up to and beyond three years[17]. Both formal  
8 professional support and informal support from friends, families and others are important  
9 during this time, and address different needs[20-22], and may be especially important for  
10 first-degree relatives[23]. Despite their acute needs, those bereaved by suicide are less likely  
11 than other bereaved individuals to receive informal support and immediate support  
12 following the death, and are more likely to experience a delay in receiving support [17].  
13  
14  
15  
16  
17  
18  
19

20  
21 Although a significant number of quantitative studies have examined the associations  
22 among suicide bereavement, physical health outcomes and access to support, these areas  
23 have rarely been examined from an experiential perspective using qualitative research in a  
24 general sample[24 25]. Researchers are beginning to identify the need for further qualitative  
25 research on suicide bereavement [26], to take into account the inherent complexity of  
26 grieving and social processes[27]. Qualitative research can help to elucidate the lived  
27 experience of suicide bereavement, highlighting such areas as feelings experienced by those  
28 bereaved by suicide, the meaning-making process following bereavement, and social  
29 context[28].  
30  
31  
32  
33  
34  
35  
36

37 The primary aim of this research is to examine how people have been physically and  
38 psychologically affected by a family member's suicide. A secondary objective of the study is  
39 to describe the support needs required by family members bereaved by suicide. The current  
40 mixed-methods approach benefits from leveraging the advantages of both quantitative and  
41 qualitative methodological approaches[29], while being able to provide a more  
42 comprehensive and in-depth consideration of the research problem under investigation[30].  
43  
44  
45  
46  
47

## 48 **METHODS**

### 49 **Study design and setting**

50  
51  
52 This study applied a mixed-methods approach. The qualitative study was linked to a larger  
53 case-control study, the Suicide Support and Information System: A Case-Control Study (SSIS-  
54 ACE, January 2014-March 2017). Qualitative interviews were supplemented with  
55  
56  
57

1  
2  
3 quantitative data of suicide-bereaved family members' wellbeing, which was collected as  
4 part of the larger case-control study. Further information on the study design has been  
5 reported elsewhere[31] and is available as supplementary file 1.  
6  
7

## 8 **Sample and recruitment**

### 10 *Qualitative study*

11  
12 A subset of the 33 participants over the age of eighteen who took part in the SSIS-ACE study  
13 and who consented for further follow-up were approached to take part in the qualitative  
14 study. At the time of the qualitative study recruitment, there were 29 participants in the  
15 larger study to sample from. Three of these did not provide written consent for further  
16 follow-up and one only wanted to be contacted again by the researcher that conducted the  
17 initial psychological autopsy interview. Therefore, 25 individuals were initially contacted via  
18 a letter. Nineteen participants agreed to the interview but one participant did not consent  
19 for the interview to be audio-recorded and was therefore excluded from the qualitative  
20 analysis. Therefore, eighteen interviews were conducted (female = 11; male = 7), which  
21 yielded a response rate of 75%. In one instance, two family members were interviewed  
22 together at their request. No repeat interviews were conducted. Interviewees were a  
23 spouse (n = 7), a parent (n = 5), a sibling (n = 2) and a child (n = 4). Full details of the  
24 recruitment process are illustrated in figure 1. Mean time since bereavement during the  
25 qualitative interviews was 27.6 months (range: 15- 38 months). Half of all family members  
26 interviewed (n = 9) found the deceased's body, while the other half (n = 9) were informed of  
27 the death by other family members or a member of the police force.  
28  
29  
30  
31  
32  
33  
34  
35  
36  
37  
38  
39  
40  
41  
42  
43  
44  
45

### 46 *Quantitative study*

47 The quantitative data outlined in this paper was collected as part of a larger case-  
48 control study (SSIS-ACE). In SSIS-ACE, a senior researcher reviewed records of consecutive  
49 suicides and open verdict files from inquests held by all coroners in Cork, Ireland over a 19-  
50 month period. Open verdict files that met the Rosenberg criteria[32] for the determination  
51 of suicide[32] were eligible for inclusion in the study as probable suicides[31]. Relatives  
52 were eligible to participate in an interview for the case-control study if they were well-  
53 acquainted enough with the deceased to provide detailed information with respect to the  
54  
55  
56  
57  
58  
59  
60



1  
2  
3 deceased's life and were over the age of 14 years. Family members were contacted by letter  
4 and then by telephone and invited to participate in the psychological autopsy interview.  
5  
6 'Psychological autopsy' is a specific research method which involves retrospectively  
7  
8 collecting information on aspects of a suicide decedents life, including socio-demographics,  
9  
10 previous self-harm, mental health, physical health, personality traits and treatment  
11  
12 provided by health care professionals before the suicide[33]. This information is primarily  
13  
14 gathered via structured interviews with family or friends of the deceased and also  
15  
16 information obtained by health professionals who treated the deceased[33]. The study took  
17  
18 into account elements of the psychological autopsy approach according to Conner and  
19  
20 colleagues[34]. Thirty-four family members agreed to take part but one interview was not  
21  
22 fully completed and was excluded from analyses. Therefore, full interviews were completed  
23  
24 with 33 family members (44%). This response rate is similar to other psychological autopsy  
25  
26 studies[35 36]. The mean time since bereavement during the psychological autopsy  
27  
28 interviews was 10.2 months (range: 6 – 21 months).  
29  
30  
31  
32  
33  
34  
35  
36  
37  
38  
39  
40  
41  
42  
43  
44  
45  
46  
47  
48  
49  
50  
51  
52  
53  
54  
55  
56  
57  
58  
59  
60

**Insert Figure 1 here**

**Figure 1:** Flowchart of recruitment process for SSIS-ACE study

## Measures

### *Qualitative study*

Semi-structured interviews (n = 18) were conducted with the aid of a topic guide[31] in order to explore the experiences of people bereaved by the suicide. Interviews began by asking participants about the relationship they had with the deceased. The physical and emotional impact of the bereavement on them was then explored. The impact of the bereavement on the family and their social life was then explored. In addition, participants were asked about what support services they received and what they feel suicide-bereaved family members require in the immediate aftermath and the medium and long-term. Participants' permission to audio-record the interview was obtained. Thirteen interviews took place in the participant's home, two in university research offices and three at a neutral location selected by participants. All interviews took place in a single session. Mean length of interviews was 97.5 minutes (range 42-180 minutes).

### *Quantitative study*

Family members' wellbeing was assessed using the 21-item version of the Depression, Anxiety, and Stress Scale (DASS-21) [37]. This scale assesses a participant's wellbeing in the past week. The scale successfully differentiates between the three affective states while also demonstrating consistency between clinical and non-clinical samples[37]. Median scores of depression, anxiety and stress, together with dichotomised variables were presented. Recommended cut-off scores to generate severity level ranges from normal, mild, moderate, severe and extremely severe categories[38]. However, due to small numbers in the study, it was not possible to subdivide the sample by these five categories. Therefore, participants who met the criteria for depression, anxiety and/or stress at the levels between mild and extremely severe were collapsed into a category of above the "normal" cut-off and those below these scores were classified as "normal". Scores of  $\geq 10$  for depression,  $\geq 8$  for anxiety and  $\geq 15$  for stress were considered indicative of the presence of depression, anxiety, or stress respectively. These cut-off points have been used previously [37 39] and are considered diagnostic indicators of potential diagnoses of depression, anxiety and/or stress [38 40]. All statistical analyses were conducted using SPSS Version 22.

## Data analysis

### *Qualitative study*

Qualitative data were analysed using thematic analysis, which is a flexible method that allows for a variety of ontological and epistemological stances[41]. Thematic analysis involves a number of steps, including familiarising oneself with the data, generating initial codes, searching, reviewing and finally, defining themes[41]. Two authors (AS and KMS) coded the data and all stages of coding and development of themes were discussed with the research team. NVIVO 11 software facilitated the organisation of the data. In the absence of standardised guidelines to report mixed-methods research, the Consolidated Criteria for Reporting Qualitative Research (COREQ) checklist was used and is available as supplementary file 2.

### *Quantitative study*

Descriptive statistics were used to present information on the age, gender and marital status of the suicide decedents, the method of suicide, if a suicide note was present and if there was a history of self-harm prior to the death. The age and gender of the family members and their relationship to the deceased were also presented using descriptive statistics. The characteristics of those interviewed for the follow-up qualitative study was compared with those who were not interviewed using Chi-Square and T-tests. Tests of normality indicated the data was non-normal and therefore non-parametric tests were utilised. Median scores and inter-quartile ranges were computed to describe the DASS-21 sub-scales and total score. A Mann-Whitney U test was used to test for differences in wellbeing for males and females and for people bereaved by a hanging or non-hanging suicide.

## RESULTS

### *Qualitative results*

The 18 participants interviewed for the qualitative study did not significantly differ from those not interviewed regarding their gender ( $p = .42$ ), age ( $p = .56$ ), relationship to the deceased ( $p = .69$ ), method of suicide ( $p = .69$ ), their depression ( $p = .49$ ), anxiety ( $p = .08$ ), stress ( $p = .59$ ) and total score ( $p = .28$ ) on the DASS-21 scale. Three main themes were

1  
2  
3 identified from the analysis process: 'Co-occurrence of grief and health reactions', 'disparity  
4 in supports after suicide' and 'reconstructing life after deceased's suicide'.  
5

6  
7 *Co-occurrence of grief and health reactions*  
8

9 This first superordinate theme has two subordinate themes; 'immediate grief reactions' and  
10 'enduring physical, psychological and psychosomatic health difficulties'. It was apparent  
11 throughout the interviews that physical, psychosomatic and psychological health  
12 experiences were often tied in with grief reactions, including blame, guilt and extreme  
13 sadness. Additionally, reactions were influenced by contextual factors, such as whether the  
14 participant found their family members body or whether they were informed of the death  
15 by others.  
16

17  
18 Immediate grief reactions experienced by participants ranged from guilt, blame, shame,  
19 sadness and relief. Participants often felt angry, both towards the deceased and also  
20 healthcare professionals who cared for the deceased. Conversely, two participants were not  
21 angry with their loved one for taking their own lives: one participant felt relieved their  
22 family member was no longer suffering psychologically and "felt she had escaped, she got  
23 out of it" and revealed it "alleviated some of the pressure" as "she was going to get worse  
24 and worse". Feelings of numbness were reported, with some participants not wanting to  
25 believe that their loved one was dead. One family member could not believe her sister was  
26 dead until she was given the chance to view her body. The delay in receiving the news about  
27 the death and viewing the body appears to have been especially difficult for her when  
28 acknowledging the death:  
29

30  
31 "I went on then for the night like nothing had happened being honest with you, it was just  
32 numb and I didn't want to believe it until I saw it for myself. That was the Wednesday and  
33 we didn't see her until the Friday" (sibling)  
34  
35

36  
37 Physical reactions experienced at the immediate point of bereavement included nausea,  
38 vomiting, breathlessness, numbness, memory loss, and an inability to stand as "my legs had  
39 just given way". One participant noted an immediate physical change to their health, as  
40 their heart rate escalated upon hearing about the death, which resulted in a diagnosis of  
41 hypertension the following day:  
42  
43

1  
2  
3 “My heart rate went up straight away, through the roof. Actually, I had to see a doctor on  
4 [sic] the next day ...and I’m on blood pressure control pills since then and I will be probably  
5  
6 for the rest of my life” (sibling)  
7

8  
9 Other psychosomatic health reactions often noted by participants included physical pain,  
10 severe abdominal pains, loss of appetite, low energy levels and an inability to sleep in the  
11 immediate aftermath of the suicide. Some participants attributed their low energy levels to  
12 “the emotion” and “turmoil” associated with their grieving, while others felt it was due to  
13 their disrupted sleeping patterns. Reported problems with sleeping in the immediate  
14 aftermath varied in severity and duration. One participant described how they “couldn’t  
15 sleep at all in the beginning” and another described how they tried to tire themselves during  
16 the day with walks in an attempt to sleep at night. A number of participants described  
17 experiencing distressing nightmares and visions of the deceased:  
18  
19

20  
21 “The son came in like and he was asking me what I was doing...[deceased] was talking to me,  
22 I was talking to him, he was there like, do you know what I’m saying...I thought he  
23 was, I was out of my bed and the whole lot” (parent).  
24

25  
26 Loss of appetite was reported by some participants as a psychosomatic reaction which often  
27 led to weight loss. Reasons for loss of appetite varied, including nausea due to flashbacks of  
28 finding the body or feelings of depression and despondence following the death:  
29

30  
31 “Food-wise, I’m never hungry, I could stay without it all day...if I have a cup of tea and a bit  
32 of bread in the morning, I’m grand...Since himself has gone, you’re just getting up in the  
33 morning doing the odd old thing, sure what’s the point in doing it like” (spouse).  
34

35  
36 Finding the decedent’s body appeared to induce more severe reactions in some cases which  
37 often extended to longer-term psychological impacts, including depression, anxiety, panic  
38 attacks, post-traumatic stress disorder, suicidal thoughts and suicide attempts.  
39

40  
41 “I was depressed afterwards and I...still have this fuzziness in my head...it’s very hard to  
42 explain. It feels like I’m stressed, stressed, like even small little things I can’t deal with”  
43 (spouse)  
44

45  
46 One participant noted that they were not distressed at finding the body but described the  
47 scene as “calm”, while also providing her with the opportunity to say goodbye to the  
48  
49

1  
2  
3 deceased. It also allowed her to lay “down on the ground beside him and I put my head  
4 down on his chest...he was still warm and everything...I just stayed there for a long...I  
5 suppose it was my way of saying goodbye to him” (sibling).  
6  
7

8  
9 The initial experiences of the majority of family members bereaved by suicide set the stage  
10 for enduring physical, psychological and psychosomatic difficulties in the months following  
11 the bereavement. Firstly, a number of adverse mental health outcomes were reported by  
12 family members including being more concerned about their own mental health,  
13 experiencing suicidal thoughts, suicide attempts, depression, anxiety and physician-  
14 diagnosed post-traumatic stress disorder (PTSD) in the months after the death. Nightmares,  
15 memory loss and intrusive images of the deceased were often present. One participant  
16 attempted suicide in the months after the suicide but emphasised they did not want to die  
17 but rather to escape the emotional pain and depression:  
18  
19  
20  
21  
22  
23

24 “The morning that it happened, I just woke up and the feeling was so awful just inside my  
25 head, I thought like I just can’t stick this anymore, so that’s why I done [*sic*] it. It was just like  
26 to get away from this awful feeling” (sibling)  
27  
28  
29

30 Ongoing intrusive images of the deceased and how they died were also reported by a  
31 number of participants. These images were not restricted to those who found the body but  
32 were also experienced by those who were informed of the death by others. One participant  
33 was preoccupied with the violent and traumatic nature of the death which resulted in her  
34 still being unable to sleep at night:  
35  
36  
37  
38

39 “I’d be awake all night...and then I’m wrecked during the day. In the dead of night in the  
40 dark I think about how she done [*sic*] it...that would make me ill” (parent)  
41  
42  
43

44 Additionally, a number of participants reported psychosomatic symptoms including, chronic  
45 feelings of low energy/exhaustion, persistent chest pains, breathlessness and physical pain  
46 which endured in the months after deceased’s death. Their health status was often  
47 influenced by their health behaviours. Some family members noted “everything stopped,  
48 the world stopped that day” and tried but failed to resume their normal physical activity.  
49 For others, negative health behaviours, including excessive alcohol consumption and over-  
50 eating were used as a coping mechanism:  
51  
52  
53  
54  
55  
56  
57

1  
2  
3 “I’d drink I’d say [pauses] a bottle of vodka a day and a few pints as well... it’s [the alcohol  
4 consumption] got a bit worse... I don’t know if it’s directly related to it or whether I’m using  
5 it as an excuse” (parent)  
6  
7

8  
9 Importantly, some family members experienced an improvement in health behaviours,  
10 including, increasing their levels of physical activity which benefited fitness levels, healthy  
11 weight loss and aided the grieving process:  
12  
13

14 “I went out to the dancing on a Wednesday night, I said make new friends you know...ya I’ve  
15 got fitter... That was a big boost for me to chat to people and pass away the week” (spouse)  
16  
17

18 Participants experienced a number of adverse physical health problems in the months after  
19 the deceased’s suicide, including being diagnosed with hypertension, type 1 diabetes and  
20 diverticulitis. Participants attributed these diagnoses to the stress of the deaths:  
21  
22

23  
24 “I was hospitalised again this week with it...the doctor came in and said “you need to stop,  
25 you really need to stop, it’s not cancer but it’s going to affect you for the rest of your life...I  
26 know that’s a consequence of dealing with [deceased’s death]” (child)  
27  
28

### 29 30 *Disparity in supports after suicide* 31

32 The second superordinate theme has two subordinate subthemes; ‘need for formal support’  
33 and ‘need for informal support’. Participants described requiring a range of supports,  
34 however, these needs were often not fully addressed by the formal and informal support  
35 networks. This disparity in the needs and availability of support impacted on the  
36 participant’s grieving process. Primarily, both formal and informal support were required to  
37 address intense psychological, psychosomatic and physical symptoms brought about by  
38 feelings of anger, guilt and blame:  
39  
40  
41  
42  
43

44  
45 “I went to a bereavement information evening one night before I started any counselling,  
46 they put up on a screen physical symptoms and there was about 20 different things and I  
47 could tick at least 10 of them, shortness of breath, panic attacks, headaches, chest pains,  
48 physical chest pains...crippling abdominal pains...it’s the anger that manifests itself in  
49 physical pain” (spouse)  
50  
51  
52  
53

54 Informal support, in the form of practical and emotional support from family and friends  
55 was as important as formal support to some participants. One participant described how  
56  
57

1  
2  
3 “every night for so long my parents came over to stay every night”, while another credited  
4 his wife as “the biggest support that I have received”. He went on to say that if he was “just  
5 left to wallow in it”, that he “would have gone into a big black hole over it”. Another  
6 participant emphasised the importance of both informal and formal support following a  
7 suicide:  
8  
9

10  
11  
12 “The love of my family... “come home, we’ll mind you” and they did, that was incredible and  
13 if some poor person doesn’t have that, I really pity them. It’s your family and your friends  
14 that gets you through that, and the counselling” (spouse)  
15  
16

17  
18 Others described how family and friends helped with funeral arrangements, financial  
19 support, preparing or bringing food to the family member and helping with practical jobs  
20 around the house, such as maintaining the house and garden in the weeks and months after  
21 the death:  
22  
23

24  
25 “My friends from down the town would come up every day with food and I would always  
26 forgot they were going to do it [laughs] so they were coming up for about a month with  
27 food, they were so kind... I was embarrassed but I found it helpful” (spouse)  
28  
29

30  
31 In some instances, fractured family relations impeded the family member receiving informal  
32 support. In those instances, the importance of formal support is paramount:  
33  
34

35 “I have a sister but then we fell out over this, I don’t have any contact with them...My  
36 problem is if I was feeling down, I wouldn’t say it to them... [I’d be] very wary of people  
37 because I’ve said things and it’s gone around town...I know I can trust my counsellor or my  
38 doctor or yourself there now” (spouse)  
39  
40  
41

42  
43 Another participant sought formal support as they “needed to speak to somebody outside  
44 of my family because I was upsetting everybody when I wanted to talk”. Seeking formal  
45 support was imperative “to get the counselling, just taking time to reflect on everything and  
46 deal with it”. Two participants noted respectively that there was “no pressure with money”  
47 from the counsellor and if they didn’t have “the money that day she’d say give it to me  
48 when you have it”. A number of participants spoke about having to stop formal support due  
49 to financial reasons, with one participant stating that there “should be free counselling for  
50 people bereaved by suicide”:  
51  
52  
53  
54  
55  
56  
57



1  
2  
3 “I hadn’t any steady money coming in, my illness benefit had finished and stuff like that...So  
4 that’s the reason I finished up with him [counsellor]” (spouse)  
5  
6

7 The understanding and flexibility of some bereavement counsellors following the suicide  
8 were hugely valued by participants. However, not all experiences with formal support were  
9 positive, with one person noting that the counsellors were “too shocked to deal with me”,  
10 while another said the counsellor “had the clock ticking”. Participants noted that nobody  
11 proactively contacted them to offer formal support. This point is particularly salient as many  
12 spoke of being unable to seek help themselves or were unsure of what help was required.  
13 Feeling “so awful” and “you don’t even know what you need” were significant barriers to  
14 seeking help while others had to “make the phone calls” and “run after all of them [the  
15 counselling services]”. One participant spoke about how she didn’t approach her own GP for  
16 help “but he never came with a list of things either to see how I was either, here’s a list of  
17 services you can avail of”. She expected him to contact her and she explained “it’s very hard  
18 yourself because you don’t even know what you need”. As a result, she was searching the  
19 internet “to find anything” and spoke about how “things aren’t readily available I think in  
20 this day and age even though mental health is a really important thing”.  
21  
22  
23  
24  
25  
26  
27  
28  
29  
30

31 Some participants wanted to attend a suicide bereavement support group as they felt  
32 counsellors could not “possibly understand what’s going on in my head, like unless they’ve  
33 been through it”. Others spoke of wanting to talk to others “with similar experiences”  
34 because “I think it’s important for me to feel that I’m not the only one going through this”.  
35 Additionally, one participant felt that she would benefit from it “because I do find I’m alone  
36 in my thoughts of it and I’m interested in getting other peoples stories so I can relate [to it]”.  
37 However, no such support groups were available for any of the participants. A small number  
38 of participants reported that they did not require any formal support. One participant spoke  
39 with their husband about whether they needed counselling and both concluded that they  
40 can “hack this” on their own. Specifically, two participants who noted they did not require  
41 formal support were engaging in over-eating and excessive alcohol consumption as coping  
42 mechanisms.  
43  
44  
45  
46  
47  
48  
49  
50  
51  
52

### 53 *Reconstructing life after deceased’s suicide*

54  
55  
56  
57

1  
2  
3 Each participant was confronted with trying to comprehend, make sense of, and reconstruct  
4 aspects of their lives following their family member's suicide. Participants were particularly  
5 concerned with aspects of their wellbeing. Some spoke about finding it difficult to look  
6 positively to the future. Some participants spoke about moving forward in terms of  
7 relationships. One participant spoke about how "he [the deceased] was the person I was  
8 supposed to spend the rest of my life with and looking to the future without him is...it's hard  
9 for me to do". She explains how people often say to her "you're young, you're going to find  
10 someone else...and have more kids". However, she feels "that's not for me now... I feel like I  
11 had that experience with him, and I feel like I don't want that with anyone else ever". Some  
12 participants spoke about seeking new relationships following their partner's death. One  
13 participant spoke about how her friends and her counsellor broached the topic of a new  
14 relationship with her and she felt "why not...I have an awful lot of love to give". Seeking new  
15 relationships and friendships was an important aspect of moving forward for some  
16 participants as "there was lots of times where I wouldn't go out...but eventually I got it into  
17 my head, I went out to the dancing on a Wednesday night, I said make new friends...and  
18 then I met this new girl last year before Christmas".

19  
20  
21  
22  
23  
24  
25  
26  
27  
28  
29  
30  
31 In terms of wellbeing, a small minority of participants were unable to experience positive  
32 thoughts following the suicide. One spoke about wondering "what's the point in  
33 living...that's what's killing me". Another participant spoke about she no longer socialises  
34 since her partner's death and becomes depressed following constant rumination about his  
35 death:

36  
37  
38  
39  
40 "I don't socialise the way I used to before with other people...the tv might be on but I'd have  
41 no interest, I'd be just thinking away to myself and get depressed about it then" (spouse)

42  
43  
44 Conversely, the majority of participants spoke about how while they had negative thoughts,  
45 they were often able to balance these with more positive thoughts. One participant noted  
46 that simple things like turning on the radio so there's "something on in the house" or  
47 watching a DVD with his children helps as he "enjoys it when we're all together". Various  
48 other social activities and past-times such as walking and gardening were endorsed by some  
49 as helping during the grieving process. One participant spoke about how she uses yoga as a  
50 means of "being present" and to tell herself that she's "ok" even when "there are still  
51 images in my head" after finding the deceased. A further participant stated they were "very  
52  
53  
54  
55  
56  
57  
58  
59  
60

1  
2  
3 positive” and engaged in walking and “a bit of photography” which helped him in “hanging  
4 together fairly well”.

5  
6  
7 Part of this reconstruction was also about reappraising what was important to them and  
8 how they thought about life. Some participants chose to make big life changes after the  
9 death, including moving homes, changing jobs or completely disengaging from the work  
10 environment:  
11  
12

13  
14 “I haven’t gone back to my old job in [big city], you know life has changed and I was working  
15 long days and didn’t really have a life, now, I’m looking back and saying, there’s a little bit  
16 more to life than that you know?” (spouse)  
17  
18

19  
20 Two participants moved house soon after the death. One described that she “couldn’t stay  
21 there” as the death occurred in the house. The other participant was forced to sell the  
22 house to pay off the debts the deceased had accumulated but had hidden from his partner.  
23 The participant felt a sense of rejection and betrayal that the deceased didn’t trust her  
24 enough to speak to her about their spiralling debts. She would have “toughed it out and said  
25 to him ok what are we going to do about it” but she feels he was afraid to tell her as “I  
26 suppose he thought I’d leave him”. Three participants were in the process of selling their  
27 properties or had a strong desire to move at the time of the interview as one felt she could  
28 not “move forward while I’m in this house presently” due to her experience of visions of the  
29 deceased in the house.  
30  
31  
32  
33  
34  
35  
36  
37

### 38 **Quantitative results**

#### 39 *Characteristics of decedents and family members*

40  
41  
42 Characteristics of the 33 suicide decedents and family members bereaved by suicide are  
43 presented in Table 1. The majority of suicide decedents were male (72.7%), aged 40-59  
44 years (42.4%), were single (42.4%) at the time of death, and died by hanging (57.6%). While,  
45 just over half of the suicide-bereaved family members were female (54.5%) and aged  
46 between 40-59 years (57.6%). The most commonly represented kinship was partner/spouse  
47 (36.4%). The majority of suicide decedents were educated to secondary school level  
48 (39.4%), followed by one quarter (27.3%) and one fifth (21.2%) were educated to post-  
49 leaving certificate and third level, respectively. The majority of suicide decedents (42.4%)  
50  
51  
52  
53  
54  
55  
56  
57  
58  
59  
60

were employed/self-employed prior to their death. Data for the other educational and employment categories were not presented to maintain confidentiality. Hanging was the most common method of suicide (57.6%), with over half of the sample having a history of intentional self-harm prior to their suicide (54.5%). Just under a half of suicide decedents (45.5%) left a suicide note.

Table 1: Characteristic of suicide decedents and suicide-bereaved family members (n = 33)

|                                               | Suicide decedents N (%) | Family members N (%) |
|-----------------------------------------------|-------------------------|----------------------|
| <b>Sex</b>                                    |                         |                      |
| Male                                          | 24 (72.7)               | 15 (45.5)            |
| Female                                        | 9 (27.3)                | 18 (54.5)            |
| <b>Age</b>                                    |                         |                      |
| 18-39 years                                   | 9 (27.3)                | 7 (21.2)             |
| 40-59 years                                   | 14 (42.2)               | 19 (57.6)            |
| 60+ years                                     | 10 (30.3)               | 7 (21.2)             |
| <b>Interviewee's relationship to deceased</b> |                         |                      |
| Partner/Spouse                                |                         | 12 (36.4)            |
| Parent                                        |                         | 7 (21.2)             |
| Sibling                                       |                         | 9 (27.3)             |
| Child                                         |                         | 5 (15.2)             |
| <b>Marital status</b>                         |                         |                      |
| Single                                        | 14 (42.2)               |                      |
| Married/co-habiting                           | 12 (36.4)               |                      |
| Widowed/divorced/separated                    | 7 (21.2)                |                      |

*Wellbeing outcomes (DASS-21 scale)*

Median scores on the DASS-21 were highest for stress (Mdn = 12.00, IQR = 11.00), followed by depression (Mdn = 4.00, IQR = 8.00) and anxiety (Mdn = 2.00, IQR = 5.00). Nearly one-quarter of the sample (24.2%) had scores that indicated the presence of at least mild levels of depression. One in four suicide-bereaved family members (27.3%) had scores that

indicated the presence of at least mild levels of stress. Just under a fifth of participants (18.2%) had scores that indicated the presence of at least mild levels of anxiety (Table 2). These outcomes refer to participants' wellbeing in the week before the interview.

Table 2: Descriptive statistics of DASS-21 scale scores

|                  | Median (IQR)  | Range | Above "normal" cut-off N (%) <sup>1</sup> |
|------------------|---------------|-------|-------------------------------------------|
| Depression score | 4.00 (8.00)   | 0-34  | 8 (24.2)                                  |
| Anxiety score    | 2.00 (5.00)   | 0-24  | 6 (18.2)                                  |
| Stress score     | 12.00 (11.00) | 0-28  | 9 (27.3)                                  |
| Total score      | 18.00 (26.00) | 0-76  |                                           |

A Mann-Whitney U test revealed no significant difference in the levels of depression ( $p = .47$ ), anxiety ( $p = .37$ ) and stress ( $p = .81$ ) between suicide-bereaved males and females (Table 3). A Mann-Whitney U test also revealed no significant differences for levels of depression ( $p = .43$ ), anxiety ( $p = .45$ ) and stress ( $p = .61$ ) between those bereaved by hanging and non-hanging suicides (Table 3).

Table 3: DASS-21 median rank scores by gender and method of suicide

|                              | Males<br>N = 15 | Females<br>N = 18 | p   | Hanging<br>N = 19 | Non-hanging <sup>2</sup><br>N = 14 | p   |
|------------------------------|-----------------|-------------------|-----|-------------------|------------------------------------|-----|
| <b>Variable Median (IQR)</b> |                 |                   |     |                   |                                    |     |
| Depression score             | 4.00 (10.00)    | 4.00 (7.00)       | .47 | 4.00 (6.00)       | 4.00 (13.00)                       | .43 |
| Anxiety score                | 2.00 (2.00)     | 3.00 (14.00)      | .37 | 2.00 (6.00)       | 2.00 (6.00)                        | .45 |
| Stress score                 | 12.00 (12.00)   | 11.00 (11.00)     | .81 | 10.00 (10.00)     | 13.00 (13.00)                      | .61 |
| Total score                  | 18.00 (26.00)   | 18.00 (32.00)     | .93 | 18.00 (14.00)     | 19.00 (29.00)                      | .74 |

## DISCUSSION

<sup>1</sup> Scores of  $\geq 10$  for depression,  $\geq 8$  for anxiety and  $\geq 15$  for stress

<sup>2</sup> Includes every other method besides hanging

### Principal findings

The qualitative and quantitative aspects of this study provides insight into the unique grief processes and health impacts experienced by family members bereaved by suicide. The qualitative study further addresses a significant gap in the literature by exploring the physical, psychosomatic health experiences and health behaviours of suicide-bereaved family members. Results from the quantitative component of this study indicate that a sizeable minority of suicide-bereaved family members experienced elevated levels of depression, anxiety, and stress. Other empirical studies have found similar rates of depression and anxiety amongst suicide-bereaved people to the current study, with one study finding that 18% of the sample were moderately to severely depressed, as measured on the PHQ-9, while 21% reported anxiety symptoms on the GAD- 2[42]. Furthermore, the prevalence of depression in family members bereaved by suicide was reported in previous studies as 30.5%[11] and 23%[43]. Other studies of nonclinical samples of adults had lower median scores on the DASS-21 scale when compared to the suicide-bereaved median scores found in this study[44 45]. Therefore, this indicates that those bereaved by suicide may have higher rates of depression, anxiety and stress compared to nonclinical adult samples.

One possible explanation for the lower than expected prevalence of depression, anxiety and/or stress in our sample may be selection bias. Those family members who chose to take part in the study may have had lower levels of psychopathology or difficulties with the grieving process than other bereaved family members, and therefore may have been more likely to take part in the study. One recent population-based study compared suicide-bereaved parents with matched non-bereaved parents: 20.5% of suicide-bereaved parents refused to take part or to complete the study on the grounds of distress or ill-health, compared to just 7.6% of non-suicide bereaved parents[42]. This suggests that those who agree to take part in suicide bereavement research may be in better health than those who declined to participate. Consequently, the number of suicide-bereaved people experiencing high levels of depression, anxiety, and/or stress in this study and other empirical research may be an underestimate of the true figure. Findings from the qualitative interviews indicate that the initial feelings experienced by family members bereaved by suicide include disbelief, shock, blame, guilt and anger. These mirror findings from other qualitative studies [28]. Our qualitative and quantitative results indicate that suicide-bereaved family members

1  
2  
3 experience a number of adverse psychological problems including, depression, anxiety,  
4 panic attacks, suicidal thoughts, intrusive images, nightmares and PTSD. In addition, a  
5 number of participants also experienced adverse psychosomatic health experiences  
6 including feelings of nausea, vomiting, chest pains, palpitations, physical pain, abdominal  
7 pains, and breathlessness. In some cases, these symptoms continued in the months after  
8 the death and were associated with diagnoses such as hypertension, diverticulitis and type 1  
9 diabetes. Bolton and colleagues[11] took a quantitative approach and similarly found that  
10 suicide-bereaved parents had significantly higher rates of cardiovascular disease, chronic  
11 obstructive pulmonary disease, hypertension, diabetes, depression and anxiety disorders  
12 compared accident-bereaved parents. Additionally, a recent systematic review noted that  
13 there is tentative evidence to suggest that suicide-bereaved family members have an  
14 increased risk for a number of adverse physical health outcomes compared to people  
15 bereaved by other causes of death[11 13-15 46]. Therefore, this study corroborates these  
16 previous findings that people bereaved by suicide can experience adverse physical and  
17 psychological health outcomes.  
18  
19  
20  
21  
22  
23  
24  
25  
26  
27  
28

29 The quantitative and particularly the qualitative component of this study illustrate  
30 the difficulties encountered by family members bereaved by suicide and consequently, the  
31 support they require. Research compiled by Grad and colleagues[47] underlies the  
32 importance of those bereaved by suicide having the opportunity to seek support from  
33 outside the family. Some participants spoke of the desire to attend a suicide support group.  
34 However, there is little research on the effectiveness of these groups for those bereaved by  
35 suicide[48]. It was also clear from the interviews that financial difficulties in the aftermath of  
36 the suicide were unfortunately common and prevented many from accessing formal support  
37 services. Participants spoke about having to halt their counselling sessions due to a lack of  
38 money to pay for the service. Reasons for financial difficulties varied and included inheriting  
39 debts accrued by the deceased prior to the death or having to give up or take a break from  
40 work due to grieving difficulties. Another study found that duration of support was  
41 important, with 27% of people believing they required professional help for at least 12  
42 months following the death. Furthermore, 25% and 17.4% reported needing support for at  
43 least two years, or for as long as required[23]. These points underlie the importance of not  
44  
45  
46  
47  
48  
49  
50  
51  
52  
53  
54  
55  
56  
57  
58  
59  
60

1  
2  
3 only providing timely and effective support to people bereaved by suicide but also support  
4 that does not preclude people due to their financial circumstances.  
5  
6

7 The findings from the semi-structured interviews corroborate the quantitative  
8 results of family members' wellbeing, as measured by the DASS-21 scale. The quantitative  
9 scale found that nearly one quarter of family members had scores that indicated at least  
10 mild levels of depression. Furthermore, 1 in four and nearly 1 in five had a least mild levels  
11 of stress and anxiety, respectively. The qualitative interviews provided a greater insight into  
12 these difficulties through participants' descriptions of visions/nightmares, suicidal ideation,  
13 suicide attempts and physician-diagnosed depression, anxiety and PTSD in the months  
14 following the suicide. Additionally, this mixed-methods study identified a gap in the  
15 literature relating to qualitative research specifically exploring the physical and  
16 psychosomatic health experiences in family members bereaved by suicide. Going forward,  
17 further quantitative research investigating the association between suicide bereavement  
18 and objective measures of physical health is required.  
19  
20  
21  
22  
23  
24  
25  
26  
27

### 28 **Strengths and limitations**

29  
30 This is the first mixed-methods study to specifically examine and explore the physical and  
31 psychological health implications of suicide bereavement from both a quantitative and a  
32 qualitative perspective. The mixed-methods approach and the comprehensive recruitment  
33 process involved is a key strength of this study. The quantitative data for this study was  
34 derived from the larger SSIS-ACE case-control study which included consecutive cases of  
35 suicide and open verdict cases that met the Rosenberg criteria for the determination of  
36 suicide which were identified via examining coroner's records [32]. Basic information about  
37 the case and next-of-kin information was collected. Family members were initially contacted  
38 via letter and telephone to take part in a psychological autopsy study. Data on family  
39 members' wellbeing was collected at the end of the psychological autopsy interview. This  
40 data was analysed and forms the quantitative component of this mixed-methods study.  
41 Following their participation in the larger case-control study, those who provided written  
42 consent for follow-up were contacted by the first author of this paper to take part in an  
43 additional qualitative interview about their experiences following the suicide. Recruitment  
44 of the family members via coroner's records and the consecutive nature of the suicide and  
45 open verdict cases reduces the likelihood of selection bias, which is often a significant  
46  
47  
48  
49  
50  
51  
52  
53  
54  
55  
56  
57  
58  
59  
60



1  
2  
3 problem in research addressing vulnerable populations[49]. The validity of this research can  
4 be considered good as this research covered both confirmed suicide deaths and open  
5 verdicts deaths as these may in fact be hidden suicide cases[50-52]. Furthermore,  
6 researchers have recommended that such cases meeting criteria for a probable suicide  
7 should be included in future research studies[51]. The combination of quantitative and  
8 qualitative research provides a clear indication of the challenges and health problems  
9 encountered by family members bereaved by suicide.  
10  
11  
12  
13  
14

15 While the numbers of suicide-bereaved family members in the study is modest, the  
16 quantitative results are similar to those obtained in larger studies, as previously stated[11  
17 43]. The interviewer for the qualitative component of the study (AS) did not conduct any of  
18 the interviews for the SSIS-ACE study, which minimises the risk of interviewer bias in the  
19 mixed-methods study. This study has two main limitations. Firstly, family members' physical  
20 health experiences were self-reported and therefore do not constitute an objective  
21 measure. An objective measure of physical health would remove any potential for recall bias  
22 in participants' responses. However, the focus of the qualitative component of the study is  
23 to understand family member's experience of their own health, rather than objective health  
24 status. Secondly, the relatively small quantitative sample size did not allow for more  
25 sophisticated statistical analyses, including controlling for potential confounding factors  
26 such as closeness to the deceased, kinship and time since death which may have impacted  
27 on the results presented. Further mixed-methods research examining an objective measure  
28 of physical health would be a significant addition to the knowledge base.  
29  
30  
31  
32  
33  
34  
35  
36  
37  
38  
39

#### 40 **Implications**

41  
42 Considering previous research in the area, this study adds to the existing knowledge-base in  
43 a number of ways. While the mental health outcomes of suicide bereavement have been  
44 well-researched, there has been a dearth of research specifically examining the physical and  
45 psychosomatic health outcomes of suicide bereavement from an experiential perspective.  
46 Several implications arise from this research for professionals seeking to support people  
47 bereaved by suicide. First, equal attention needs to be given to the physical and emotional  
48 sequelae following suicide bereavement by clinicians. This research suggests that one in  
49 four people bereaved by suicide will suffer elevated levels of depression and stress and just  
50 under one in five will have elevated levels of anxiety. Second, it was clear that, due to  
51  
52  
53  
54  
55  
56  
57  
58  
59  
60

1  
2  
3 mental and physical health difficulties, some people were not able to effectively identify or  
4 seek support. This underlies the importance of health professionals, coroners and any other  
5 professional to pro-actively facilitate support for those bereaved by suicide. This  
6 professional support is especially important when strained or fractured familial relations  
7 affect the quality of the bereaved person's informal support network.  
8  
9  
10  
11  
12  
13

#### 14 **Author affiliations**

15  
16 <sup>1</sup>School of Public Health, University College Cork, Cork, Ireland

17  
18 <sup>2</sup>National Suicide Research Foundation, University College Cork, Cork, Ireland

19  
20  
21 <sup>3</sup>Department of Emergency Medicine, University of Massachusetts Medical School,  
22 Worcester, MA, USA  
23  
24

#### 25 **Acknowledgements**

26  
27 The authors would like to thank all of those who took the time to take part in the interviews.  
28 The authors would also like to acknowledge Dr Christina Dillon for her guidance with respect  
29 to the quantitative data analysis.  
30  
31

#### 32 **Author's contribution**

33  
34 AS drafted the initial protocol document. AS, CL, EA and PC contributed to the design of the  
35 study. KMS, CL, PC and EA contributed to planned analyses. KMS, CL, EA and PC contributed  
36 to revising drafts. All authors contributed to the final manuscript.  
37  
38  
39

#### 40 **Funding statement**

41  
42 This work was conducted as part of the SPHeRE Programme under Grant No.  
43 SPHeRE/2013/1. I would also like to acknowledge the funding received from the Health  
44 Research Board to conduct the original SSIS-ACE case-control study, Grant No. HRA-2013-  
45 PHR-438 and the National Office for Suicide Prevention for providing funding for the  
46 supervision of this research.  
47  
48  
49  
50

#### 51 **Competing interests**

52  
53 None  
54

#### 55 **Exclusive licence statement**

1  
2  
3 The Corresponding Author has the right to grant on behalf of all authors and does grant on  
4 behalf of all authors, a worldwide licence to the Publishers and its licensees in perpetuity, in  
5 all forms, formats and media (whether known now or created in the future), to i) publish,  
6 reproduce, distribute, display and store the Contribution, ii) translate the Contribution into  
7 other languages, create adaptations, reprints, include within collections and create  
8 summaries, extracts and/or, abstracts of the Contribution, iii) create any other derivative  
9 work(s) based on the Contribution, iv) to exploit all subsidiary rights in the Contribution, v)  
10 the inclusion of electronic links from the Contribution to third party material where-ever it  
11 may be located; and, vi) licence any third party to do any or all of the above.  
12  
13  
14  
15  
16  
17  
18

### 19 **Ethical approval**

20  
21 Ethical approval has been granted from the Clinical Research Ethics Committee of University  
22 College Cork, reference number: ECM 4 (o) 19/01/2016. Ethical approval was also granted  
23 from the Clinical Research Ethics Committee of University College Cork, for the SSIS-ACE  
24 study, reference number: ECM 5(5) 01/04/2014.  
25  
26  
27  
28

### 29 **Data sharing statement**

30  
31 The data recorded, transcribed and analysed is very sensitive in nature. Due to the relatively  
32 small number of participants and the specific geographic location, it would not be  
33 appropriate to consider data sharing due to the risk of people being potentially identified.  
34  
35  
36

### 37 **References**

- 38  
39 1. World Health Organisation. Preventing Suicide: A Global Imperative. Luxembourg, 2014:89.  
40 2. Berman AL. Estimating the Population of Survivors of Suicide: Seeking an Evidence Base. *Suicide*  
41 *Life Threat. Behav.* 2011;**41**(1):110-16 doi: 10.1111/j.1943-278X.2010.00009.x[published  
42 Online First: Epub Date]].  
43 3. Andriessen K, Rahman B, Draper B, Dudley M, Mitchell PB. Prevalence of exposure to suicide: A  
44 meta-analysis of population-based studies. *J. Psychiatr. Res.* 2017;**88**:113-20 doi:  
45 <http://dx.doi.org/10.1016/j.jpsychires.2017.01.017>[published  
46 Online First: Epub Date]].  
47 4. Pitman A, Osborn D, King M, Erlangsen A. Effects of suicide bereavement on mental health and  
48 suicide risk. *The Lancet Psychiatry* 2014;**1**(1):86-94 doi: 10.1016/s2215-0366(14)70224-  
49 x[published Online First: Epub Date]].  
50 5. Rostila M, Saarela J, Kawachi I. Suicide following the death of a sibling: a nationwide follow-up  
51 study from Sweden. *BMJ Open* 2013;**3**(4) doi: 10.1136/bmjopen-2013-002618[published  
52 Online First: Epub Date]].  
53 6. Pitman AL, Osborn DPJ, Rantell K, King MB. Bereavement by suicide as a risk factor for suicide  
54 attempt: a cross-sectional national UK-wide study of 3432 young bereaved adults. *BMJ Open*  
55 2016;**6**(1) doi: 10.1136/bmjopen-2015-009948[published Online First: Epub Date]].  
56  
57  
58  
59  
60

- 1
- 2
- 3 7. Wilcox HC, Kuramoto SJ, Lichtenstein P, Långström N, Brent DA, Runeson B. Psychiatric morbidity,  
4 violent crime, and suicide among children and adolescents exposed to parental death. *J. Am.*  
5 *Acad. Child Adolesc. Psychiatry* 2010;**49**(5):514-23
- 6 8. Mittendorfer-Rutz E, Rasmussen F, Lange T. A life-course study on effects of parental markers of  
7 morbidity and mortality on offspring's suicide attempt. *PLoS One* 2012;**7**(12):e51585 doi:  
8 10.1371/journal.pone.0051585[published Online First: Epub Date]].
- 9 9. Mittendorfer-Rutz E, Rasmussen F, Wasserman D. Familial clustering of suicidal behaviour and  
10 psychopathology in young suicide attempters. *Soc. Psychiatry Psychiatr. Epidemiol.*  
11 2008;**43**(1):28-36 doi: 10.1007/s00127-007-0266-0[published Online First: Epub Date]].
- 12 10. Brent D, Melhem N, Donohoe MB, Walker M. The incidence and course of depression in  
13 bereaved youth 21 months after the loss of a parent to suicide, accident, or sudden natural  
14 death. *Am. J. Psychiatry* 2009;**166**(7):786-94 doi: 10.1176/appi.ajp.2009.08081244[published  
15 Online First: Epub Date]].
- 16 11. Bolton JM, Au W, Leslie WD, et al. Parents bereaved by offspring suicide: a population-based  
17 longitudinal case-control study. *JAMA Psychiatry* 2013;**70**(2):158-67 doi:  
18 10.1001/jamapsychiatry.2013.275[published Online First: Epub Date]].
- 19 12. Spillane A, Larkin C, Corcoran P, Matvienko-Sikar K, Riordan F, Arensman E. Physical and  
20 psychosomatic health outcomes in people bereaved by suicide compared to people  
21 bereaved by other modes of death: a systematic review. *BMC Public Health* Forthcoming  
22 2017
- 23 13. Miyabayashi S, Yasuda J. Effects of loss from suicide, accidents, acute illness and chronic illness  
24 on bereaved spouses and parents in Japan: Their general health, depressive mood, and grief  
25 reaction. *Psychiatry Clin. Neurosci.* 2007;**61**(5):502-08
- 26 14. de Groot MH, de Keijser J, Neeleman J. Grief Shortly After Suicide And Natural Death: A  
27 Comparative Study Among Spouses and First-Degree Relatives. *Suicide Life Threat. Behav.*  
28 2006;**36**(4):418-31 doi: 10.1521/suli.2006.36.4.418[published Online First: Epub Date]].
- 29 15. Séguin M, Lesage A, Kiely MC. Parental Bereavement After Suicide and Accident: A Comparative  
30 Study. *Suicide Life Threat. Behav.* 1995;**25**(4):489-98 doi: 10.1111/j.1943-  
31 278X.1995.tb00241.x[published Online First: Epub Date]].
- 32 16. Pitman AL, Hunt IM, McDonnell SJ, Appleby L, Kapur N. Support for Relatives Bereaved by  
33 Psychiatric Patient Suicide: National Confidential Inquiry Into Suicide and Homicide Findings.  
34 *Psychiatr. Serv.* 2016;appi.ps.201600004 doi: 10.1176/appi.ps.201600004[published Online  
35 First: Epub Date]].
- 36 17. Pitman AL, Rantell K, Moran P, et al. Support received after bereavement by suicide and other  
37 sudden deaths: a cross-sectional UK study of 3432 young bereaved adults. *BMJ Open*  
38 2017;**7**(5) doi: 10.1136/bmjopen-2016-014487[published Online First: Epub Date]].
- 39 18. Pettersen R, Omerov P, Steineck G, et al. Suicide-Bereaved Siblings' Perception of Health  
40 Services. *Death Stud.* 2015;**39**(6):323-31 9p doi: 10.1080/07481187.2014.946624[published  
41 Online First: Epub Date]].
- 42 19. McMenamy JM, Jordan JR, Mitchell AM. What do Suicide Survivors Tell Us They Need? Results of  
43 a Pilot Study. *Suicide Life Threat. Behav.* 2008;**38**(4):375-89 doi:  
44 10.1521/suli.2008.38.4.375[published Online First: Epub Date]].
- 45 20. Dyregrov K. What do we know about needs for help after suicide in different parts of the world?  
46 A phenomenological perspective. *Crisis* 2011;**32**(6):310-8 doi: 10.1027/0227-  
47 5910/a000098[published Online First: Epub Date]].
- 48 21. Dyregrov K. Assistance from local authorities versus survivors' needs for support after suicide  
49 *Death Stud.* 2002;**26**(8):647-68 doi: 10.1080/07481180290088356[published Online First:  
50 Epub Date]].
- 51 22. Brown J, Evans-Lacko S, Aschan L, Henderson MJ, Hatch SL, Hotopf M. Seeking informal and  
52 formal help for mental health problems in the community: a secondary analysis from a  
53  
54  
55  
56  
57  
58  
59  
60

- 1  
2  
3 psychiatric morbidity survey in South London. *BMC Psychiatry* 2014;**14**(1):275 doi:  
4 10.1186/s12888-014-0275-y[published Online First: Epub Date]].
- 5 23. Wilson A, Marshall A. The support needs and experiences of suicidally bereaved family and  
6 friends. *Death Stud.* 2010;**34**(7):625-40
- 7 24. Sugrue JL, McGilloway S, Keegan O. The Experiences of Mothers Bereaved by Suicide: An  
8 Exploratory Study. *Death Stud.* 2013;**38**(2):118-24 doi:  
9 10.1080/07481187.2012.738765[published Online First: Epub Date]].
- 10 25. McKinnon JM, Chonody J. Exploring the Formal Supports Used by People Bereaved Through  
11 Suicide: A Qualitative Study. *Social Work in Mental Health* 2014;**12**(3):231-48 doi:  
12 10.1080/15332985.2014.889637[published Online First: Epub Date]].
- 13 26. Hjelmeland H, Knizek BL. Why we need qualitative research in suicidology. *Suicide Life Threat.*  
14 *Behav.* 2010;**40**(1):74-80 doi: 10.1521/suli.2010.40.1.74[published Online First: Epub Date]].
- 15 27. Ellenbogen S, Gratton F. Do They Suffer More? Reflections on Research Comparing Suicide  
16 Survivors to Other Survivors. *Suicide Life Threat. Behav.* 2001;**31**(1):83-90 doi:  
17 10.1521/suli.31.1.83.21315[published Online First: Epub Date]].
- 18 28. Shields C, Kavanagh M, Russo K. A Qualitative Systematic Review of the Bereavement Process  
19 Following Suicide. *Omega: Journal of Death & Dying* 2017;**74**(4):426-54 doi:  
20 10.1177/0030222815612281[published Online First: Epub Date]].
- 21 29. Rogers J, Apel S. Revitalizing suicidology: A call for mixed methods designs. *Suicidology Online*  
22 2010;**1**:95-98
- 23 30. Creswell JW. *A Concise Introduction to Mixed Methods Research*. Los Angeles: SAGE Publications,  
24 2015.
- 25 31. Spillane A, Larkin C, Corcoran P, Matvienko-Sikar K, Arensman E. What are the physical and  
26 psychological health effects of suicide bereavement on family members? Protocol for an  
27 observational and interview mixed-methods study in Ireland. *BMJ Open* 2017;**7**(3):e014707  
28 doi: 10.1136/bmjopen-2016-014707[published Online First: Epub Date]].
- 29 32. Rosenberg ML, Davidson LE, Smith JC, et al. Operational criteria for the determination of suicide.  
30 *J. Forensic Sci.* 1988;**33**(6):1445-56
- 31 33. Isometsä ET. Psychological autopsy studies – a review. *Eur. Psychiatry* 2001;**16**(7):379-85 doi:  
32 [http://dx.doi.org/10.1016/S0924-9338\(01\)00594-6](http://dx.doi.org/10.1016/S0924-9338(01)00594-6)[published Online First: Epub Date]].
- 33 34. Conner KR, Beautrais AL, Brent DA, Conwell Y, Phillips MR, Schneider B. The next generation of  
34 psychological autopsy studies. Part I. Interview content. *Suicide Life Threat. Behav.*  
35 2011;**41**(6):594-613 doi: 10.1111/j.1943-278X.2011.00057.x[published Online First: Epub  
36 Date]].
- 37 35. Freuchen A, Kjelsberg E, Grøholt B. Suicide or accident? A psychological autopsy study of suicide  
38 in youths under the age of 16 compared to deaths labeled as accidents. *Child and adolescent*  
39 *psychiatry and mental health* 2012;**6**:30-30 doi: 10.1186/1753-2000-6-30[published Online  
40 First: Epub Date]].
- 41 36. Wong PWC, Chan WSC, Chen EYH, Chan SSM, Law YW, Yip PSF. Suicide among adults aged 30–  
42 49: A psychological autopsy study in Hong Kong. *BMC Public Health* 2008;**8**:147-47 doi:  
43 10.1186/1471-2458-8-147[published Online First: Epub Date]].
- 44 37. Lovibond PF, Lovibond SH. The structure of negative emotional states: comparison of the  
45 Depression Anxiety Stress Scales (DASS) with the Beck Depression and Anxiety Inventories.  
46 *Behav. Res. Ther.* 1995;**33**(3):335-43
- 47 38. Lovibond SH, Lovibond PF. *Manual for the Depression Anxiety & Stress Scales*. 2nd Edition ed.  
48 Sydney Psychology Foundation 1995.
- 49 39. Cheung T, Wong SY, Wong KY, et al. Depression, Anxiety and Symptoms of Stress among  
50 Baccalaureate Nursing Students in Hong Kong: A Cross-Sectional Study. *Int. J. Environ. Res.*  
51 *Public Health* 2016;**13**(8) doi: 10.3390/ijerph13080779[published Online First: Epub Date]].
- 52 40. Parkitny L, McAuley J. The Depression Anxiety Stress Scale (DASS). *J. Physiother.* 2010;**56**(3):204  
53 doi: 10.1016/S1836-9553(10)70030-8[published Online First: Epub Date]].
- 54  
55  
56  
57  
58  
59  
60

- 1
- 2
- 3
- 4 41. Braun V, Clarke V. Using thematic analysis in psychology. *Qualitative Research in Psychology* 2006;**3**(2):77-101 doi: 10.1191/1478088706qp063oa[published Online First: Epub Date]].
- 5 42. Omerov P, Steineck G, Dyregrov K, Runeson B, Nyberg U. The ethics of doing nothing. *Suicide-*
- 6 *bereavement and research: ethical and methodological considerations.* *Psychol. Med.*
- 7 2014;**44**(16):3409-20
- 8 43. Melhem NM, Walker M, Moritz G, Brent DA. Antecedents and sequelae of sudden parental death
- 9 in offspring and surviving caregivers. *Arch. Pediatr. Adolesc. Med.* 2008;**162**(5):403-10 doi:
- 10 10.1001/archpedi.162.5.403[published Online First: Epub Date]].
- 11 44. Sinclair SJ, Siefert CJ, Slavin-Mulford JM, Stein MB, Renna M, Blais MA. Psychometric evaluation
- 12 and normative data for the depression, anxiety, and stress scales-21 (DASS-21) in a
- 13 nonclinical sample of U.S. adults. *Eval. Health Prof.* 2012;**35**(3):259-79 doi:
- 14 10.1177/0163278711424282[published Online First: Epub Date]].
- 15 45. Henry JD, Crawford JR. The short-form version of the Depression Anxiety Stress Scales (DASS-21):
- 16 Construct validity and normative data in a large non-clinical sample. *Br. J. Clin. Psychol.*
- 17 2005;**44**(2):227-39 doi: 10.1348/014466505X29657[published Online First: Epub Date]].
- 18 46. Dyregrov K, Nordanger D, Dyregrov A. Predictors of psychosocial distress after suicide, SIDS and
- 19 accidents. *Death Stud.* 2003;**27**(2):143-65 doi: 10.1080/07481180302892[published Online
- 20 First: Epub Date]].
- 21 47. Grad OT, Clark S, Dyregrov K, Andriessen K. What helps and what hinders the process of surviving
- 22 the suicide of somebody close? *Crisis* 2004;**25**(3):134-9 doi: 10.1027/0227-
- 23 5910.25.3.134[published Online First: Epub Date]].
- 24 48. Andriessen K, Krysinska K. Essential questions on suicide bereavement and postvention.
- 25 *International Journal of Environmental Research & Public Health* [Electronic Resource]
- 26 2012;**9**(1):24-32
- 27 49. Maple M, Cerel J, Jordan JR, McKay K. Uncovering and Identifying the Missing Voices in Suicide
- 28 Bereavement. *Suicidology Online* 2014;**5**:1-12
- 29 50. Pritchard C, Hansen L. Examining undetermined and accidental deaths as source of 'under-
- 30 reported-suicide' by age and sex in twenty Western countries. *Community Ment. Health J.*
- 31 2015;**51**(3):365-76 doi: 10.1007/s10597-014-9810-z[published Online First: Epub Date]].
- 32 51. Bakst SS, Braun T, Zucker I, Amitai Z, Shohat T. The accuracy of suicide statistics: are true suicide
- 33 deaths misclassified? *Soc. Psychiatry Psychiatr. Epidemiol.* 2016;**51**(1):115-23 doi:
- 34 10.1007/s00127-015-1119-x[published Online First: Epub Date]].
- 35 52. Chang SS, Sterne JA, Lu TH, Gunnell D. 'Hidden' suicides amongst deaths certified as
- 36 undetermined intent, accident by pesticide poisoning and accident by suffocation in Taiwan.
- 37 *Soc. Psychiatry Psychiatr. Epidemiol.* 2010;**45**(2):143-52 doi: 10.1007/s00127-009-0049-
- 38 x[published Online First: Epub Date]].
- 39
- 40
- 41
- 42
- 43
- 44
- 45
- 46
- 47
- 48
- 49
- 50
- 51
- 52
- 53
- 54
- 55
- 56
- 57
- 58
- 59
- 60

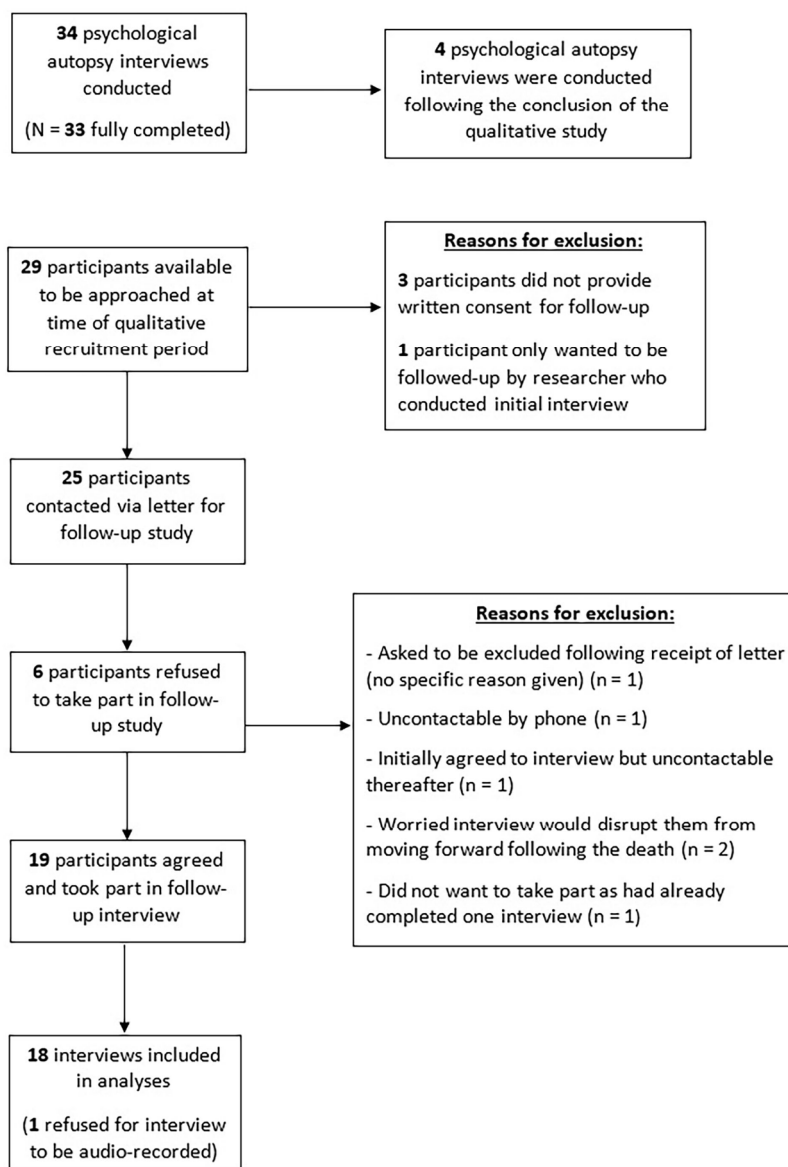

45  
46  
47  
48  
49  
50  
51  
52  
53  
54  
55  
56  
57  
58  
59  
60

Figure 1: Flowchart of recruitment process for SSIS-ACE study

176x240mm (300 x 300 DPI)



## Consolidated criteria for reporting qualitative studies (COREQ): 32-item checklist

Developed from:

Tong A, Sainsbury P, Craig J. Consolidated criteria for reporting qualitative research (COREQ): a 32-item checklist for interviews and focus groups. *International Journal for Quality in Health Care*. 2007. Volume 19, Number 6: pp. 349 – 357

**YOU MUST PROVIDE A RESPONSE FOR ALL ITEMS. ENTER N/A IF NOT APPLICABLE**

| No. Item                                       | Guide questions/description                                                                                                                              | Reported on Page # |
|------------------------------------------------|----------------------------------------------------------------------------------------------------------------------------------------------------------|--------------------|
| <b>Domain 1: Research team and reflexivity</b> |                                                                                                                                                          |                    |
| <i>Personal Characteristics</i>                |                                                                                                                                                          |                    |
| 1. Interviewer/facilitator                     | Which author/s conducted the interview or focus group?                                                                                                   | 6 (in protocol)    |
| 2. Credentials                                 | What were the researcher's credentials?<br>E.g. PhD, MD                                                                                                  | 6 (in protocol)    |
| 3. Occupation                                  | What was their occupation at the time of the study?                                                                                                      | 6 (in protocol)    |
| 4. Gender                                      | Was the researcher male or female?                                                                                                                       | 6 (in protocol)    |
| 5. Experience and training                     | What experience or training did the researcher have?                                                                                                     | 6 (in protocol)    |
| <i>Relationship with participants</i>          |                                                                                                                                                          |                    |
| 6. Relationship established                    | Was a relationship established prior to study commencement?                                                                                              | 3 (in protocol)    |
| 7. Participant knowledge of the interviewer    | What did the participants know about the researcher? e.g. personal goals, reasons for doing the research                                                 | 4 (in protocol)    |
| 8. Interviewer characteristics                 | What characteristics were reported about the interviewer/facilitator? e.g. Bias, assumptions, reasons and interests in the research topic                | 6 (in protocol)    |
| <b>Domain 2: study design</b>                  |                                                                                                                                                          |                    |
| <i>Theoretical framework</i>                   |                                                                                                                                                          |                    |
| 9. Methodological orientation and Theory       | What methodological orientation was stated to underpin the study? e.g. grounded theory, discourse analysis, ethnography, phenomenology, content analysis | 3 (in protocol)    |
| <i>Participant selection</i>                   |                                                                                                                                                          |                    |
| 10. Sampling                                   | How were participants selected? e.g. purposive, convenience, consecutive, snowball                                                                       | 5-6                |
| 11. Method of approach                         | How were participants approached? e.g. face-to-face, telephone, mail, email                                                                              | 5                  |
| 12. Sample size                                | How many participants were in the study?                                                                                                                 | 5-6                |



|                                        |                                                                                                                                 |                      |
|----------------------------------------|---------------------------------------------------------------------------------------------------------------------------------|----------------------|
| 13. Non-participation                  | How many people refused to participate or dropped out? Reasons?                                                                 | 6                    |
| <i>Setting</i>                         |                                                                                                                                 |                      |
| 14. Setting of data collection         | Where was the data collected? e.g. home, clinic, workplace                                                                      | 7                    |
| 15. Presence of non-participants       | Was anyone else present besides the participants and researchers?                                                               | 3 (in protocol)      |
| 16. Description of sample              | What are the important characteristics of the sample? e.g. demographic data, date                                               | 8                    |
| <i>Data collection</i>                 |                                                                                                                                 |                      |
| 17. Interview guide                    | Were questions, prompts, guides provided by the authors? Was it pilot tested?                                                   | 5 (in protocol)      |
| 18. Repeat interviews                  | Were repeat inter views carried out? If yes, how many?                                                                          | 5                    |
| 19. Audio/visual recording             | Did the research use audio or visual recording to collect the data?                                                             | 5                    |
| 20. Field notes                        | Were field notes made during and/or after the inter view or focus group?                                                        | 4                    |
| 21. Duration                           | What was the duration of the inter views or focus group?                                                                        | 7                    |
| 22. Data saturation                    | Was data saturation discussed?                                                                                                  | 6 (in protocol)      |
| 23. Transcripts returned               | Were transcripts returned to participants for comment and/or correction?                                                        | 6 (in protocol)      |
| <b>Domain 3: analysis and findings</b> |                                                                                                                                 |                      |
| <i>Data analysis</i>                   |                                                                                                                                 |                      |
| 24. Number of data coders              | How many data coders coded the data?                                                                                            | 8                    |
| 25. Description of the coding tree     | Did authors provide a description of the coding tree?                                                                           | 9-16                 |
| 26. Derivation of themes               | Were themes identified in advance or derived from the data?                                                                     | 5-6 (in protocol), 8 |
| 27. Software                           | What software, if applicable, was used to manage the data?                                                                      | 8                    |
| 28. Participant checking               | Did participants provide feedback on the findings?                                                                              | 6 (in protocol)      |
| <i>Reporting</i>                       |                                                                                                                                 |                      |
| 29. Quotations presented               | Were participant quotations presented to illustrate the themes/findings? Was each quotation identified? e.g. participant number | 9-16                 |
| 30. Data and findings consistent       | Was there consistency between the data presented and the findings?                                                              | 20-21                |
| 31. Clarity of major themes            | Were major themes clearly presented in the findings?                                                                            | 9-16                 |
| 32. Clarity of minor themes            | Is there a description of diverse cases or discussion of minor themes?                                                          | 9-16                 |

**Once you have completed this checklist, please save a copy and upload it as part of your submission. When requested to do so as part of the upload process, please select the file type: *Checklist*. You will NOT be able to proceed with**

1  
2  
3  
4  
5  
6  
7  
8  
9  
10  
11  
12  
13  
14  
15  
16  
17  
18  
19  
20  
21  
22  
23  
24  
25  
26  
27  
28  
29  
30  
31  
32  
33  
34  
35  
36  
37  
38  
39  
40  
41  
42  
43  
44  
45  
46  
47  
48  
49  
50  
51  
52  
53  
54  
55  
56  
57  
58  
59  
60

**submission unless the checklist has been uploaded. Please DO NOT include this checklist as part of the main manuscript document. It must be uploaded as a separate file.**

For peer review only
